# Supplementary material for: Identifying subgroups of patients using latent class analysis: should we use a single-stage or a two-stage approach? A methodological study using a cohort of patients with low back pain
Source: Springer Nature journal article supplement (doi:10.1186/s12891-017-1411-x), 2017-02-01

**a**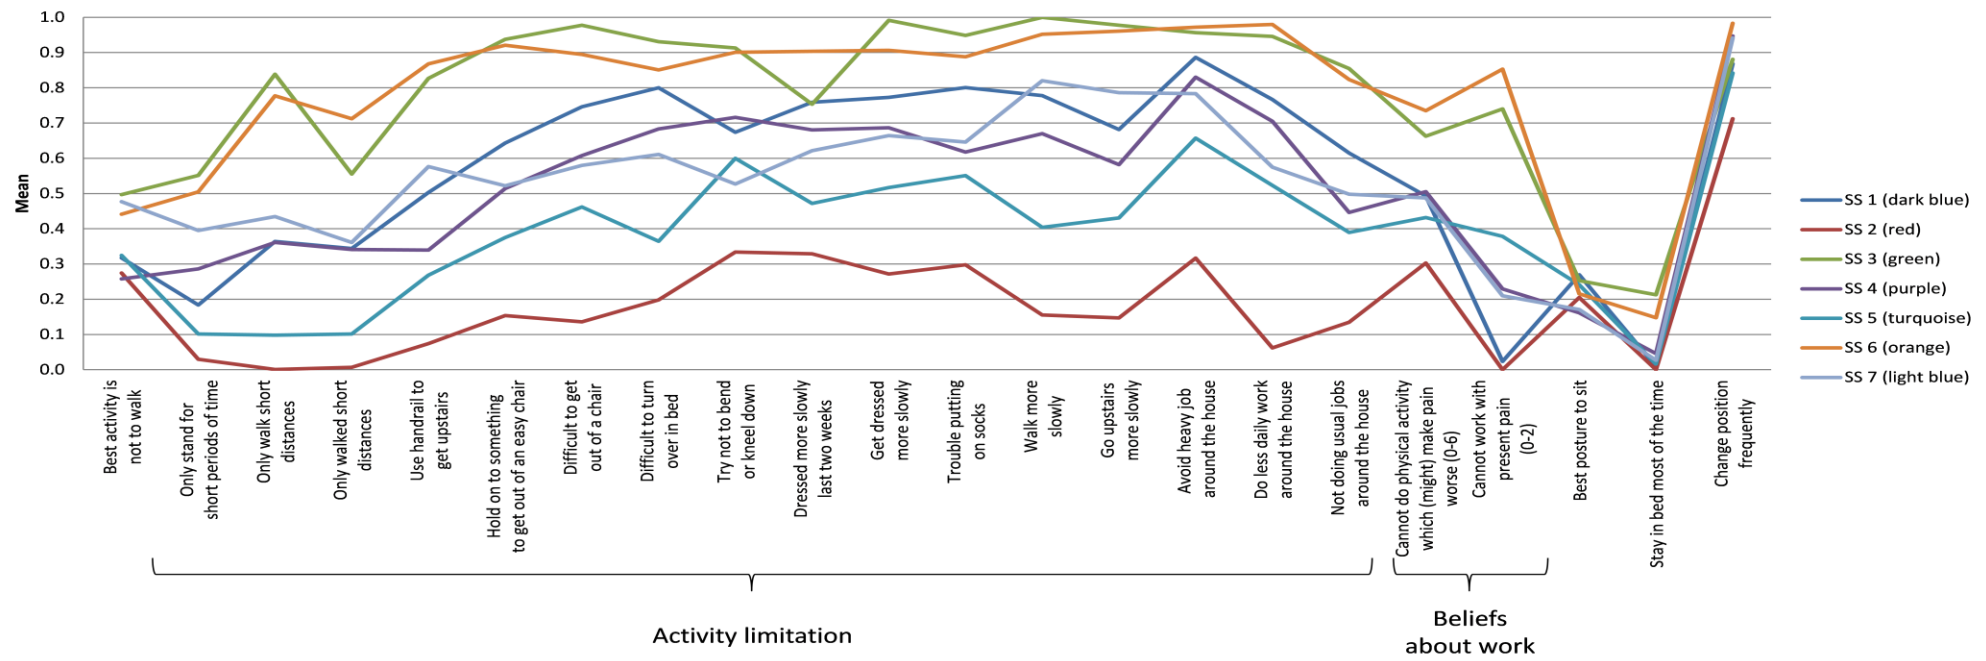**b**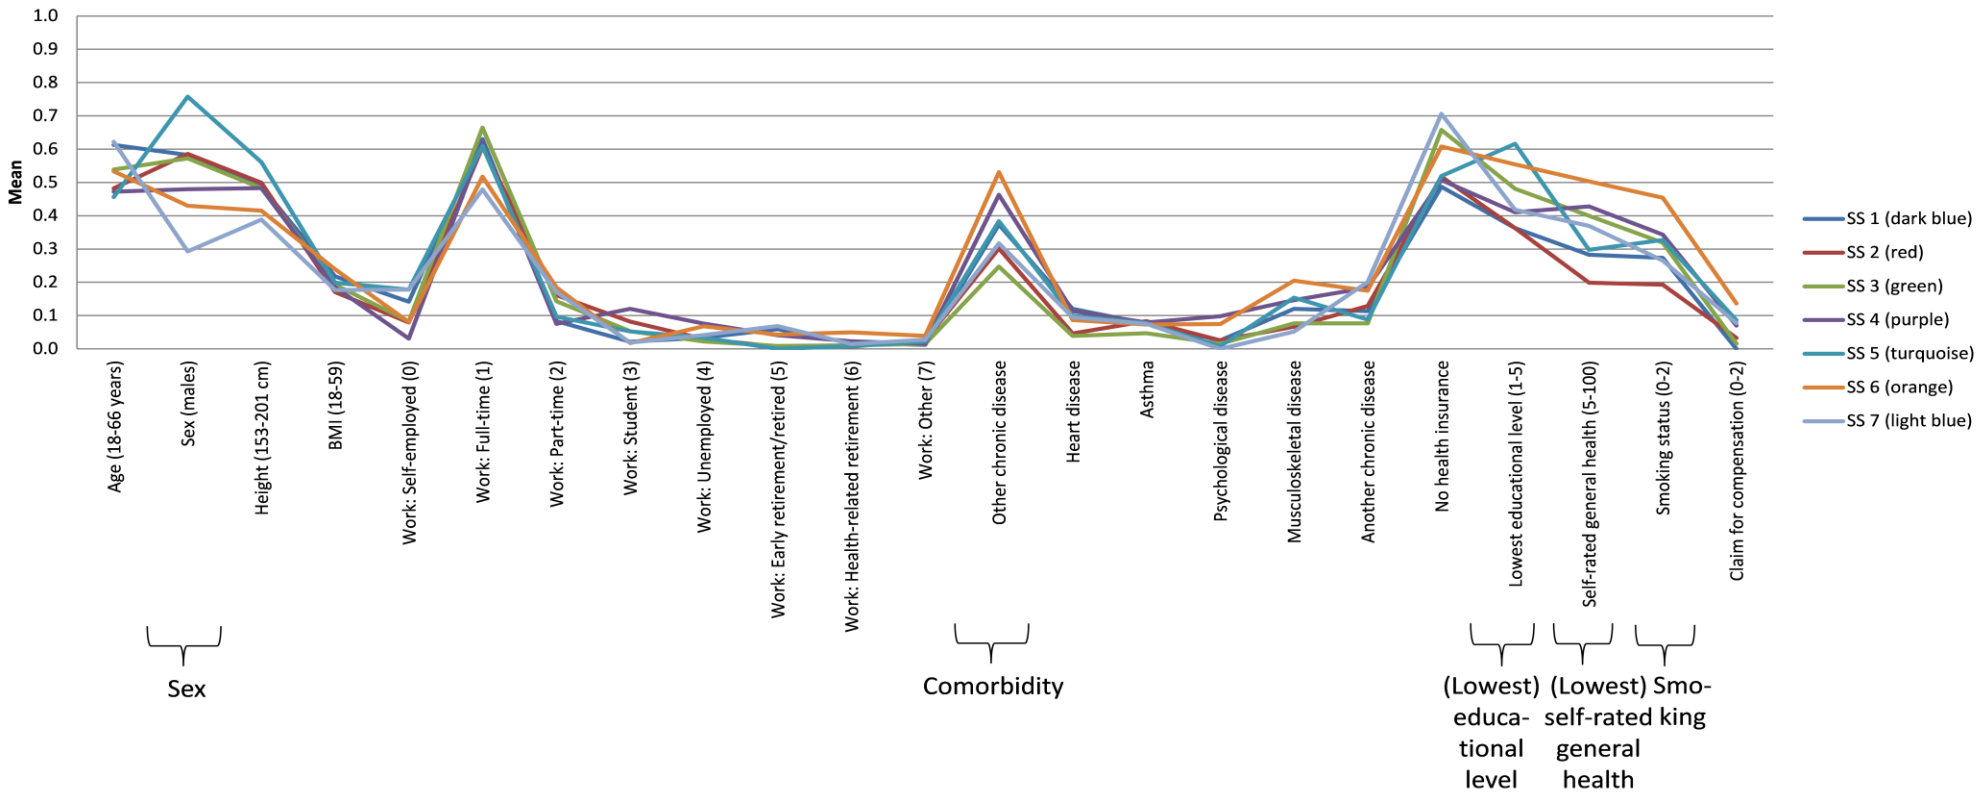

**c**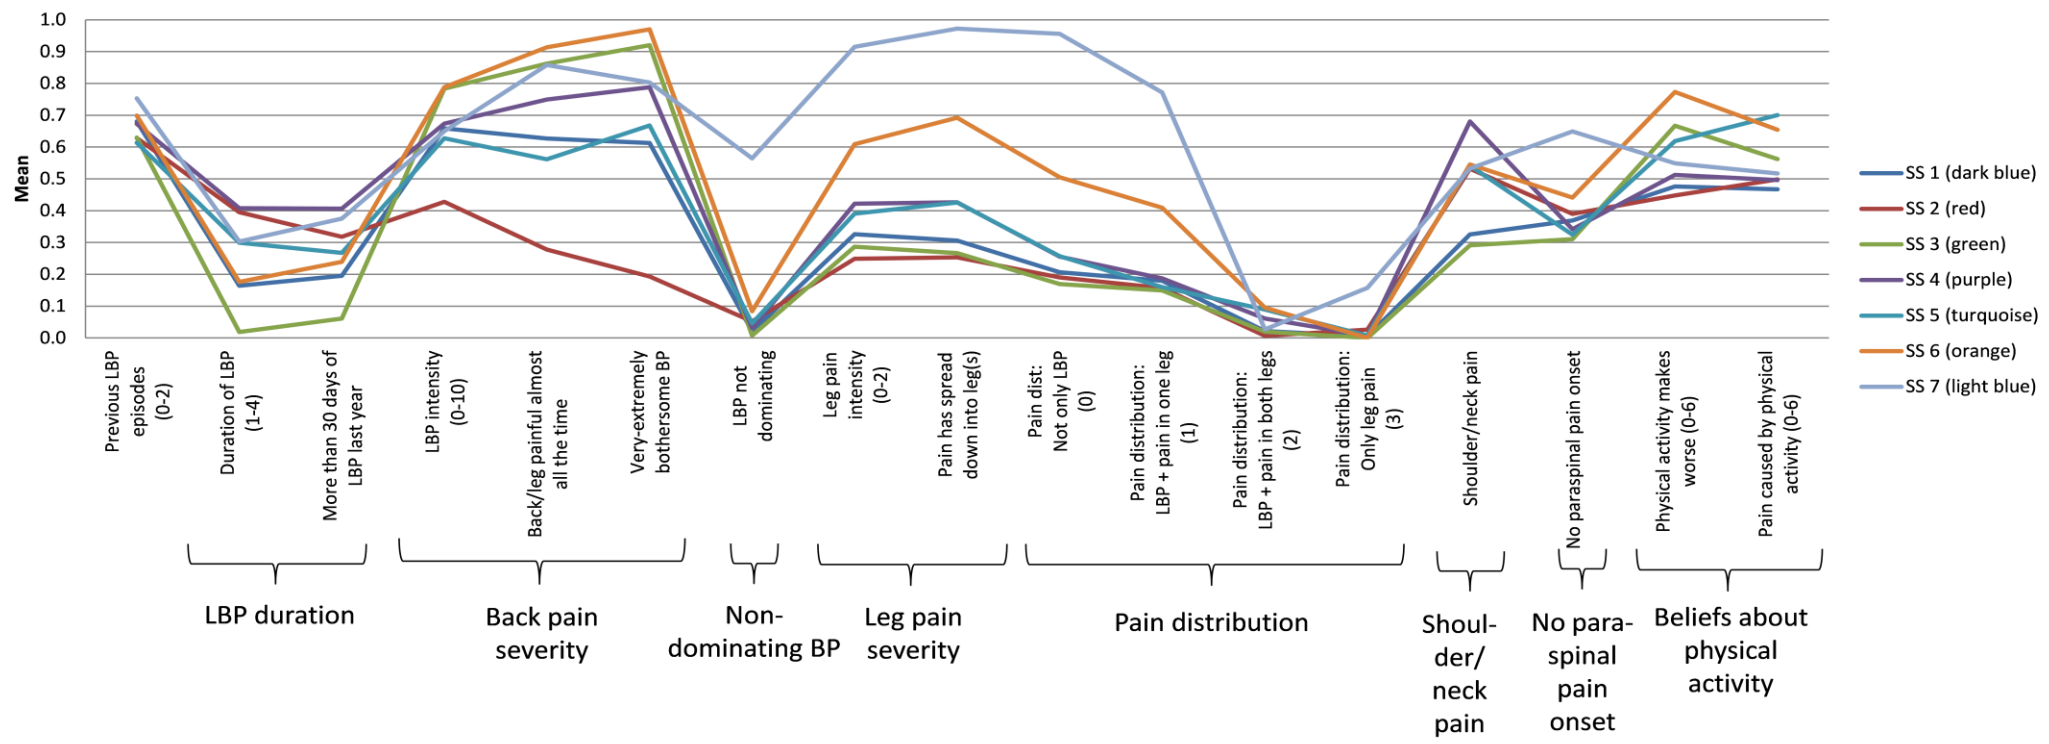**d**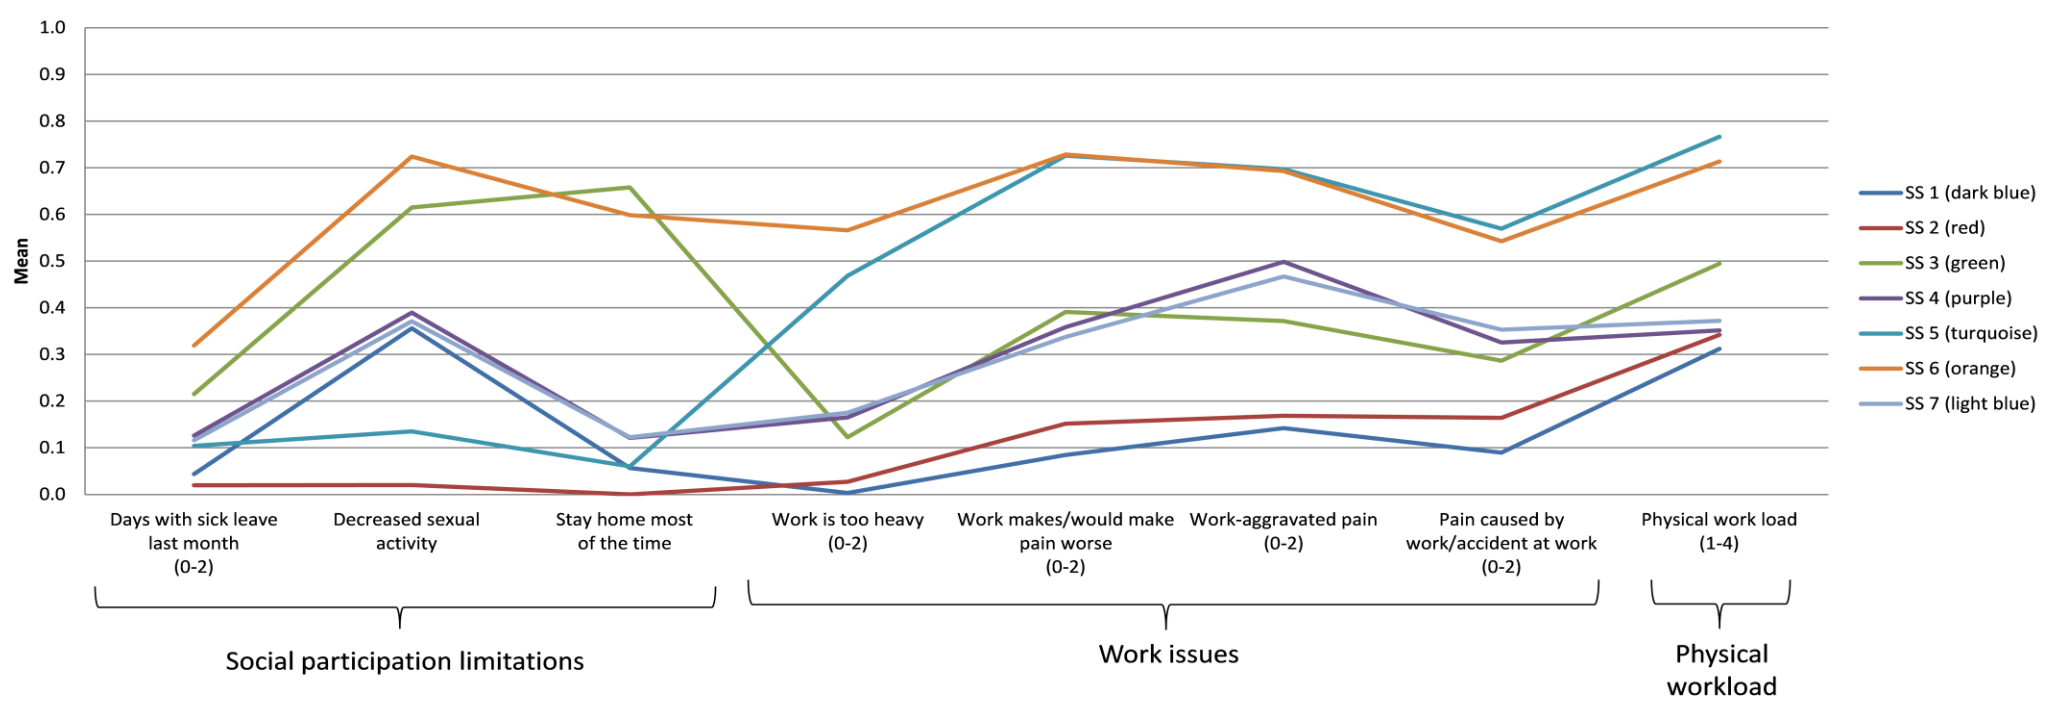

**e**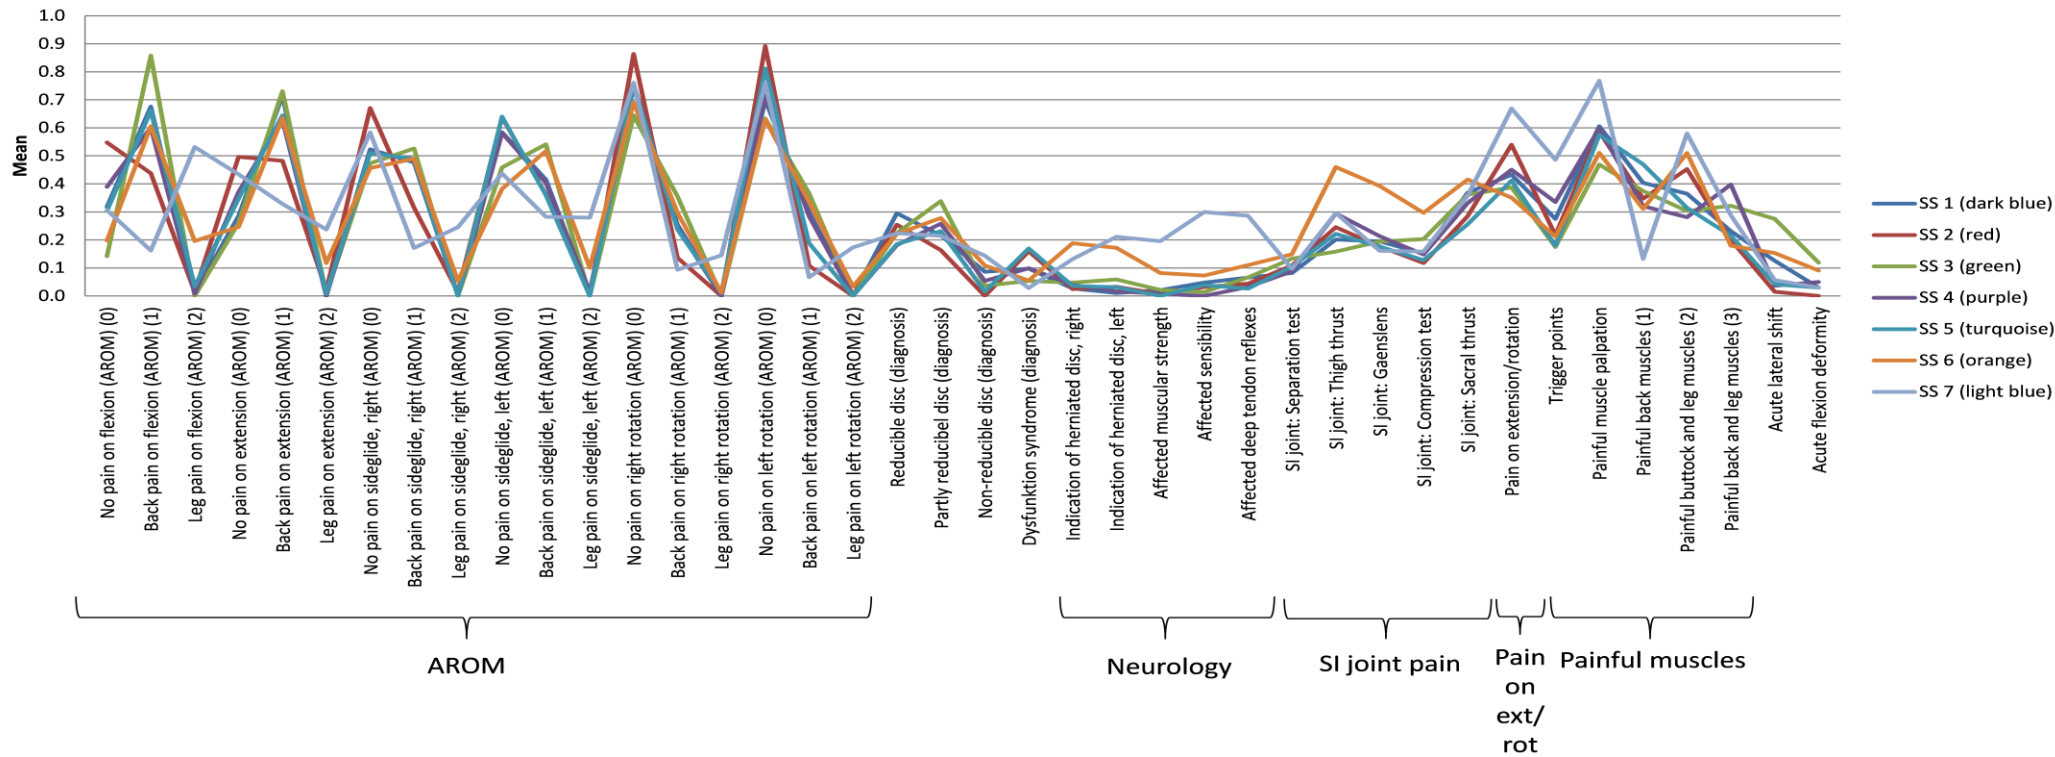**f**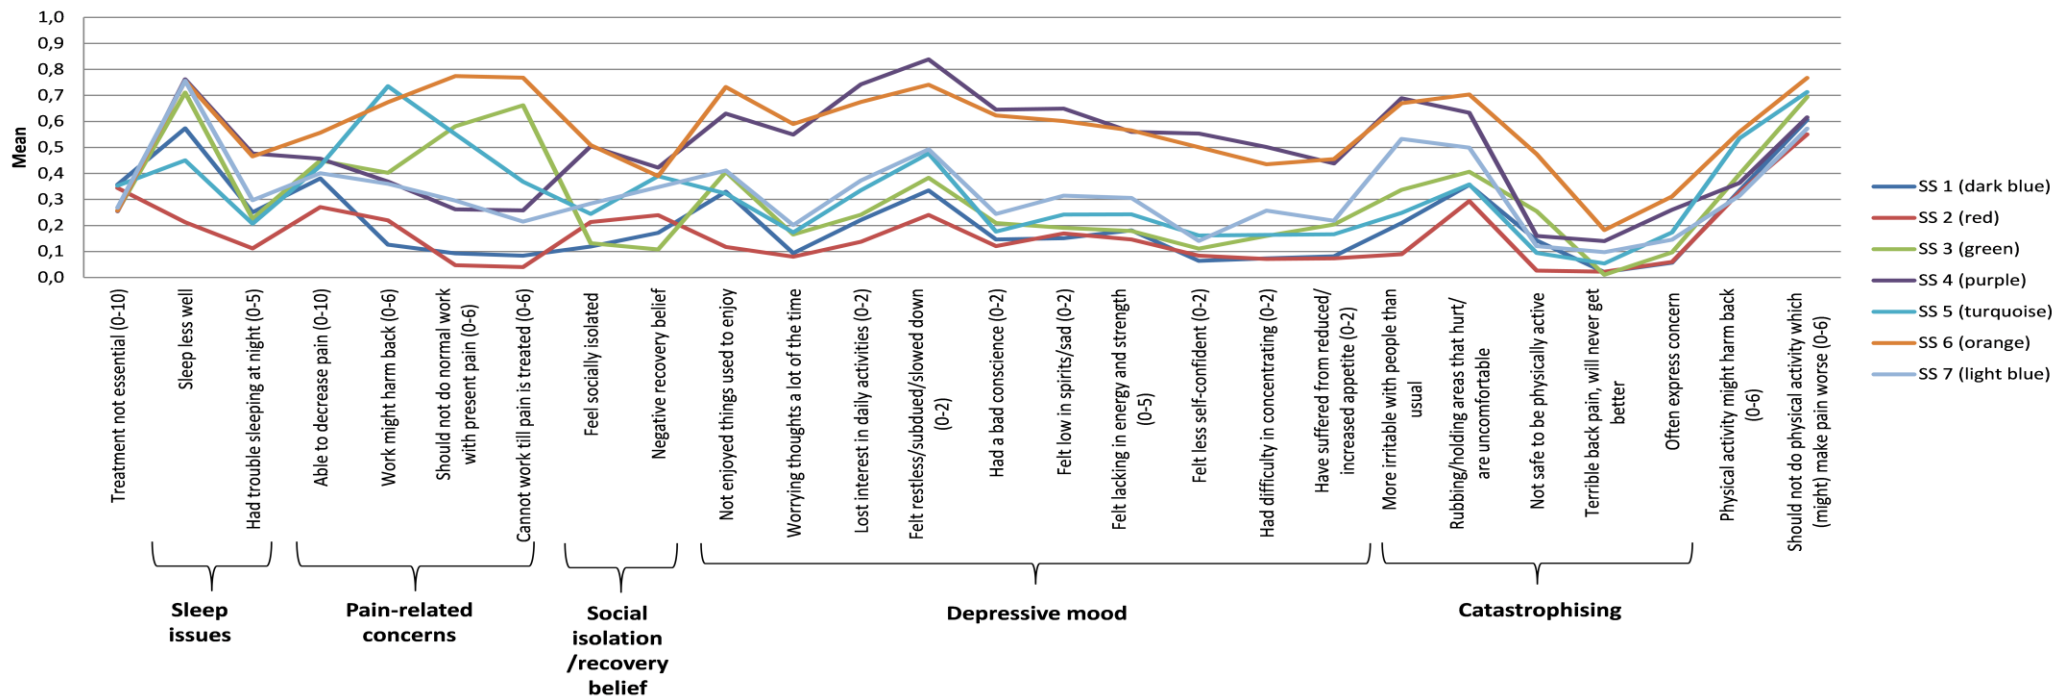

Supplement: MOESM2 [file 12035474]
