# Supplementary material for: Identifying subgroups of patients using latent class analysis: should we use a single-stage or a two-stage approach? A methodological study using a cohort of patients with low back pain
Source: Springer Nature journal article supplement (doi:10.1186/s12891-017-1411-x), 2017-02-01
Supplement: MOESM3 [file 12035474]

## Additional file 3

This document contains the descriptive presentation and profile plots of preferred model solutions for the two-stage LCA approach.

The patient subgroups (from the second stage) are presented first and subsequently the previously identified domain-specific patient categorisations (from the first stage) for each health domain.

Details of the used domain-specific patient categorisations (activity, pain, participation and psychology) have been published previously: Nielsen AM et al; *Using existing questionnaires in Latent Class Analysis: should we use summary scores or single items as input? A methodological study using a cohort of patients with low back pain.* Clin Epidemiol. 2016:73-89

### Explanatory legend

We described each variable by using:

- standardised descriptive labels for quintiles (see Table 1)
- proportions (%) for nominal or ordinal variables with less than four categories
- interquartile ranges (IQR) for the remaining ordinal items and continuous items

Subgroup/category size and description of variables are based on the patients assigned to the subgroup/category for which their posterior probability was the largest

**Table 1. Standardised wording used to report the quintiles within the estimates and subgroup profile plots**

| Range, %           | 0-19     | 20-39 | 40-59    | 60-79 | 80-100        |
|--------------------|----------|-------|----------|-------|---------------|
| 'Very few to most' | Very few | Few   | Half     | Many  | Most          |
| 'Low – high'       | Very low | Low   | Moderate | High  | Very high     |
| 'All or none'      | 0=none   |       |          |       | 100=only, all |

**Table 2. Descriptive presentation of the nine two-stage (TS) patient subgroups based on categorical latent variables derived from the first stage of the two-stage LCA**

| Patient subgroup   |                          | TS 1                                                                  | TS 2                                                   | TS 3                                                                                                            | TS 4                                                                                 | TS 5                                                                                                                                                                                                                   | TS 6                                                                                                        | TS 7                                                                                       | TS 8                                                                    | TS 9                                                                                                | Scale                                      |
|--------------------|--------------------------|-----------------------------------------------------------------------|--------------------------------------------------------|-----------------------------------------------------------------------------------------------------------------|--------------------------------------------------------------------------------------|------------------------------------------------------------------------------------------------------------------------------------------------------------------------------------------------------------------------|-------------------------------------------------------------------------------------------------------------|--------------------------------------------------------------------------------------------|-------------------------------------------------------------------------|-----------------------------------------------------------------------------------------------------|--------------------------------------------|
| Activity           | Probabilities above 0.30 | Act1=0.83                                                             | None                                                   | Act2=0.50                                                                                                       | Act2=0.48                                                                            | Act2=0.32                                                                                                                                                                                                              | Act3=0.43                                                                                                   | Act3=0.57                                                                                  | Act3=0.53                                                               | Act1=0.61                                                                                           | Multistate nominal<br>Act. 1- Act. 7       |
|                    | Description              | Very high degree of disability                                        | Uncharacteristic profile                               | Very high degree of disability, no walking distance limitations<br>Overall: difficulties in household duties... | Very high degree of disability, no walking distance limitations                      | Very high degree of disability, no walking distance limitations<br>Overall: close to uncharacteristic                                                                                                                  | Very low degree of disability<br>Overall: no walking distance limitations                                   | Very low degree of disability<br>Overall: more with dressing problems...                   | Very low degree of disability<br>Overall: Some with walking limitations | Very high degree of disability                                                                      |                                            |
| Contextual factors | Probabilities above 0.30 | Context1=0.31                                                         | Context1=0.50                                          | Context1=0.46<br>Context4=0.30                                                                                  | Context2=0.47                                                                        | Context3=0.45                                                                                                                                                                                                          | Context1=0.32<br>Context3=0.46                                                                              | Context1=0.54                                                                              | Context2=0.62                                                           | None                                                                                                | Multistate nominal<br>Context 1- Context 7 |
|                    | Description              | Healthy males working full-time or self-employed                      | Healthy males working full-time or self-employed       | Healthy males OR males with comorbidity working full-time or self-employed                                      | Healthy females working full-time or part-time                                       | Females with comorbidity working full-time or part-time                                                                                                                                                                | Healthy males working full-time or self-employed OR females with comorbidity working full-time or part-time | Healthy males working full-time or self-employed                                           | Healthy females working full-time or part-time                          | Uncharacteristic profile<br>Overall: more with comorbidity, less young students                     |                                            |
| Pain               | Probabilities above 0.30 | Pain1=0.52<br>Pain2=0.39                                              | Pain3=0.45                                             | Pain1=0.56                                                                                                      | Pain2=0.41                                                                           | Pain2=0.30                                                                                                                                                                                                             | Pain3=0.42                                                                                                  | Pain3=0.50                                                                                 | Pain6=0.47                                                              | Pain2=0.33<br>Pain7=0.35                                                                            | Multistate nominal<br>Pain 1- Pain 7       |
|                    | Description              | Recent LBP, high degree of LBP severity (some with leg pain, 'pain2') | Recent LBP with low degree of back pain severity       | Recent LBP with high degree of LBP severity                                                                     | Recent LBP with high degree of LBP severity and moderate degree of leg pain severity | Recent LBP with high degree of LBP severity and moderate degree of leg pain severity<br><i>If taking the other categories into account:</i><br>Back and leg pain of moderate-high severity, leg pain is not dominating | Recent LBP with low degree of back pain severity                                                            | Recent LBP with low degree of back pain severity                                           | Persistent LBP of moderate severity, leg pain of low severity           | Recent LBP of moderate-high severity for both back and leg pain<br>More<br>• with no dominating LBP |                                            |
| Participation      | Probabilities above 0.30 | Part4=0.40                                                            | Part1=0.97                                             | Part3=0.38                                                                                                      | Part1=0.43                                                                           | Part3=0.31                                                                                                                                                                                                             | Part1=0.48                                                                                                  | Part2=0.50                                                                                 | Part1=0.56                                                              | None                                                                                                | Multistate nominal<br>Part. 1- Part. 7     |
|                    | Description              | Social participation limitations                                      | Very few work and SPL, low degree of physical workload | Too heavy work makes pain worse                                                                                 | Very few work and SPL, low degree of physical workload                               | Too heavy work makes pain worse<br>Overall: work-issues                                                                                                                                                                | Very few work and SPL, low degree of physical workload                                                      | Very few SPL, unsure if work aggrav/makes pain worse whichever degree of physical workload | Very few work and SPL, low degree of physical workload                  | Uncharacteristic profile<br>Overall: less with social participation                                 |                                            |

|                                                |                          |                                                                                                                                                                |                                                                                                                                                           |                                                                                                                                                                                                    |                                                                                                                                                                           |                                                                                                                                                                                    |                                                                                                                                             |                                                          |                                                                                                                                                           | limitations/more with work participation limitations                                          |                                                       |
|------------------------------------------------|--------------------------|----------------------------------------------------------------------------------------------------------------------------------------------------------------|-----------------------------------------------------------------------------------------------------------------------------------------------------------|----------------------------------------------------------------------------------------------------------------------------------------------------------------------------------------------------|---------------------------------------------------------------------------------------------------------------------------------------------------------------------------|------------------------------------------------------------------------------------------------------------------------------------------------------------------------------------|---------------------------------------------------------------------------------------------------------------------------------------------|----------------------------------------------------------|-----------------------------------------------------------------------------------------------------------------------------------------------------------|-----------------------------------------------------------------------------------------------|-------------------------------------------------------|
| <b>Physical impairment</b>                     | Probabilities above 0.30 | None                                                                                                                                                           | Phyimp1=0.43                                                                                                                                              | Phyimp1=0.42                                                                                                                                                                                       | None                                                                                                                                                                      | Phyimp2=0.30<br>Phyimp4=0.30                                                                                                                                                       | Phyimp2=0.39                                                                                                                                | Phyimp1=0.64                                             | Phyimp2=0.42                                                                                                                                              | Phyimp6=1.00                                                                                  | <b>Multistate nominal</b><br>Phy.imp. 1-<br>Phy.imp 6 |
|                                                | Description              | Back pain, no leg pain                                                                                                                                         | Mainly LBP on flexion and extension, no leg pain<br><br>More with the diagnosis: 'reducible disc'                                                         | Mainly LBP on flexion and extension, no leg pain<br><br>More with LBP on all directions and painful back muscles                                                                                   | Uncharacteristic profile                                                                                                                                                  | SI joint pain/TrP/painful buttock/leg muscles OR diagnosis: Partly reducible disc<br>No leg pain                                                                                   | SI joint pain, TrP and painful buttock/leg muscles, no leg pain                                                                             | Mainly LBP on flexion and extension, no leg pain         | SI joint pain, TrP and painful buttock/leg muscles                                                                                                        | Leg pain on flex, ext and side glide. Neurological signs, TrP and painful buttock/leg muscles |                                                       |
| <b>Psychology</b>                              | Probabilities above 0.30 | Psych1=0.33                                                                                                                                                    | Psych3=0.59                                                                                                                                               | Psych2=0.32                                                                                                                                                                                        | Psych5=0.35<br>Psych6=0.44                                                                                                                                                | Psych2=0.42<br>Psych7=0.34                                                                                                                                                         | Psych1=0.33<br>Psych4=0.49                                                                                                                  | None                                                     | Psych3=0.47                                                                                                                                               | None                                                                                          | <b>Multistate nominal</b><br>Psych 1-<br>Psych8       |
|                                                | Description              | Treatment believers with low degree of depressive mood<br><br>More<br>• believe treatment is essential<br>• sleep less well<br>• low degree of depressive mood | Uncomplicated psychological profile<br><br>Less<br>• sleep less well<br>• has pain-related concerns<br>• less feel socially isolated with depressive mood | Pain-related concerns, moderate degree of depressive mood<br><br>More<br>• sleep less well<br>• has pain-related concerns<br>• feel socially isolated<br>• with moderate degree of depressive mood | Sleep issues, low degree of pain-related concerns (low-moderate degree of depressive mood)<br><br>More<br>• with sleep issues<br><br>Less<br>• with pain-related concerns | Complicated psychological profile<br><br>More<br>• sleep less well<br>• with pain-related (work) concerns<br>• feel socially isolated<br>• moderate-high degree of depressive mood | Sleep well with low degree of depressive mood<br><br>More<br>• with low degree of depressive mood<br><br>Less<br>• sleep less well (psych4) | Not complicated psychological profile OR catastrophising | Uncomplicated psychological profile<br><br>Less<br>• sleep less well<br>• has pain-related concerns<br>• less feel socially isolated with depressive mood | Uncharacteristic psychological profile<br><br>More<br>• sleep less well                       |                                                       |
| <b>Labelling</b>                               |                          | <b>Activity and social participation limitations, severe LBP</b>                                                                                               | <b>Copers with intermittent and mild LBP</b>                                                                                                              | <b>Work-related severe LBP</b>                                                                                                                                                                     | <b>Sleep issues, activity limitations, severe LBP</b>                                                                                                                     | <b>LBP with several consequences</b>                                                                                                                                               | <b>Sleeps well and SI joint pain</b>                                                                                                        | <b>Mild LBP with few consequences</b>                    | <b>Persistent LBP with SI joint pain</b>                                                                                                                  | <b>Nerve root involvement</b>                                                                 |                                                       |
| <b>Subgroup size, N</b>                        |                          | 219 (24%)                                                                                                                                                      | 161 (17%)                                                                                                                                                 | 127 (14%)                                                                                                                                                                                          | 113 (12%)                                                                                                                                                                 | 71 (8%)                                                                                                                                                                            | 69 (7%)                                                                                                                                     | 74 (8%)                                                  | 45 (5%)                                                                                                                                                   | 49 (5%)                                                                                       |                                                       |
| <b>Posterior probability, median</b>           |                          | 0.98<br>(IQR=0.82-1.00)                                                                                                                                        | 0.92<br>(IQR=0.79-0.98)                                                                                                                                   | 0.83<br>(IQR=0.63-0.95)                                                                                                                                                                            | 0.87<br>(IQR=0.74-0.94)                                                                                                                                                   | 0.87<br>(IQR=0.70-0.98)                                                                                                                                                            | 0.89<br>(IQR=0.68-0.98)                                                                                                                     | 0.85<br>(IQR=0.69-0.98)                                  | 0.94<br>(IQR=0.87-0.98)                                                                                                                                   | 0.98<br>(IQR=0.91-1.00)                                                                       |                                                       |
| <b>Posterior probability less than 0.70, N</b> |                          | 32<br>(15%)                                                                                                                                                    | 26<br>(16%)                                                                                                                                               | 41<br>(32%)                                                                                                                                                                                        | 24<br>(21%)                                                                                                                                                               | 17<br>(24%)                                                                                                                                                                        | 18<br>(26%)                                                                                                                                 | 19<br>(26%)                                              | 4<br>(9%)                                                                                                                                                 | 3<br>(6%)                                                                                     |                                                       |

TS = two-stage patient subgroup

Psych = psychology domain-specific categorisation

LBP = low back pain

Act = activity domain-specific categorisation

Part = participation domain-specific categorisation

SPL = social participation limitations

Phy.imp. = physical impairment domain-specific categorisation

SI = sacroiliac

TrP = trigger points

Context = contextual factors domain-specific categorisation



**Figure 1. Profile plots of three model solutions for patient subgroups resulting from the second stage of the two-stage LCA**

**Description of the domain-specific patient categorisations (6 variables)**

**8 patient-subgroups**

**9 patient-subgroups**

**10 patient-subgroups**

- Psych\_1: Treatment believers with low degree of depressive mood
- Psych\_2: Pain-related concerns, moderate degree of depressive mood
- Psych\_3: Uncomplicated psychological profile
- Psych\_4: Sleep well, low degree of depressive mood
- Psych\_5: Treatment believers with sleep issues and moderate degree of depressive mood
- Psych\_6: Sleep issues, low degree of pain-related concerns
- Psych\_7: The complicated psychological profile
- Psych\_8: Pain-related concerns, low degree of depressive mood
- Pain\_1: Recent LBP with high degree of back pain severity
- Pain\_2: Recent LBP with high degree of back pain severity and moderate degree of leg pain severity
- Pain\_3: Recent LBP with low degree of back pain severity
- Pain\_4: Persistent LBP, high degree of back and leg pain severity
- Pain\_5: Recent LBP with moderate degree of back pain severity, moderate degree of leg pain severity
- Pain\_6: Persistent LBP, moderate degree of back pain severity and low degree of leg pain severity
- Pain\_7: Recent LBP, moderate degree of LBP severity, moderate-high degree of LP severity, ND-LBP
- Act\_1: Very high degree of disability (transfer/climbing/bending/turning/walking/dressing/household/work)
- Act\_2: Very high degree of disability, but no walking distance limitation
- Act\_3: Very low degree of disability
- Act\_4: Low degree of disability, but dressing problems
- Act\_5: Moderate degree of disability, no walking distance limitations
- Act\_6: Low degree of disability, but difficulties in household duties
- Act\_7: Moderate degree of disability, high degree of walking limitations (speed and distance)
- Part\_1: Very few work and SPL, low degree of physical workload
- Part\_2: Very few SPL, unsure if work aggrav./makes worse, whichever degree of physical workload
- Part\_3: Very few SPL, work is too heavy, aggrav./makes worse, pain caused by or at work, high degree of PW
- Part\_4: High degree of SPL, but low degree of work limitations whichever degree of physical workload
- Part\_5: Moderate degree of SPL, work aggravated/makes pain worse, very low degree of physical workload
- Part\_6: Low degree of SPL, pain caused by work, none with very low degree of physical workload
- Part\_7: High degree of SPL, work is too heavy, aggrav./makes worse, pain caused by work, high degree of PW
- Phy.imp\_1: LBP on flexion and extension, no LP
- Phy.imp\_2: LBP on flex, ext, and side glide, no LP, SI joint pain, TP and painful buttock/leg muscles
- Phy.imp\_3: LBP on flex, ext and side glide, no LP, diagnosis: reducible disc
- Phy.imp\_4: LBP on flex, ext and side glide, no LP, diagnosis: partly reducible disc
- Phy.imp\_5: LBP on AROM in all directions, painful back muscles
- Phy.imp\_6: LP on flex, ext and side glide, neurological signs, TP and painful buttock/leg muscles
- Context 1: Healthy males working full-time or self-employed
- Context 2: Healthy females working full-time or part-time
- Context 3: Females with comorbidity, working full-time or part-time
- Context 4: Males with comorbidity, working full-time or self-employed
- Context 5: Healthy patients in their 30s, higher BMI, working full-time, students or unemployed
- Context 6: Healthy students (approx. 25 years of age), lower BMI, fewer with health insurance
- Context 7: Retired patients (or working part-time) with comorbidity, fewer with health insurance

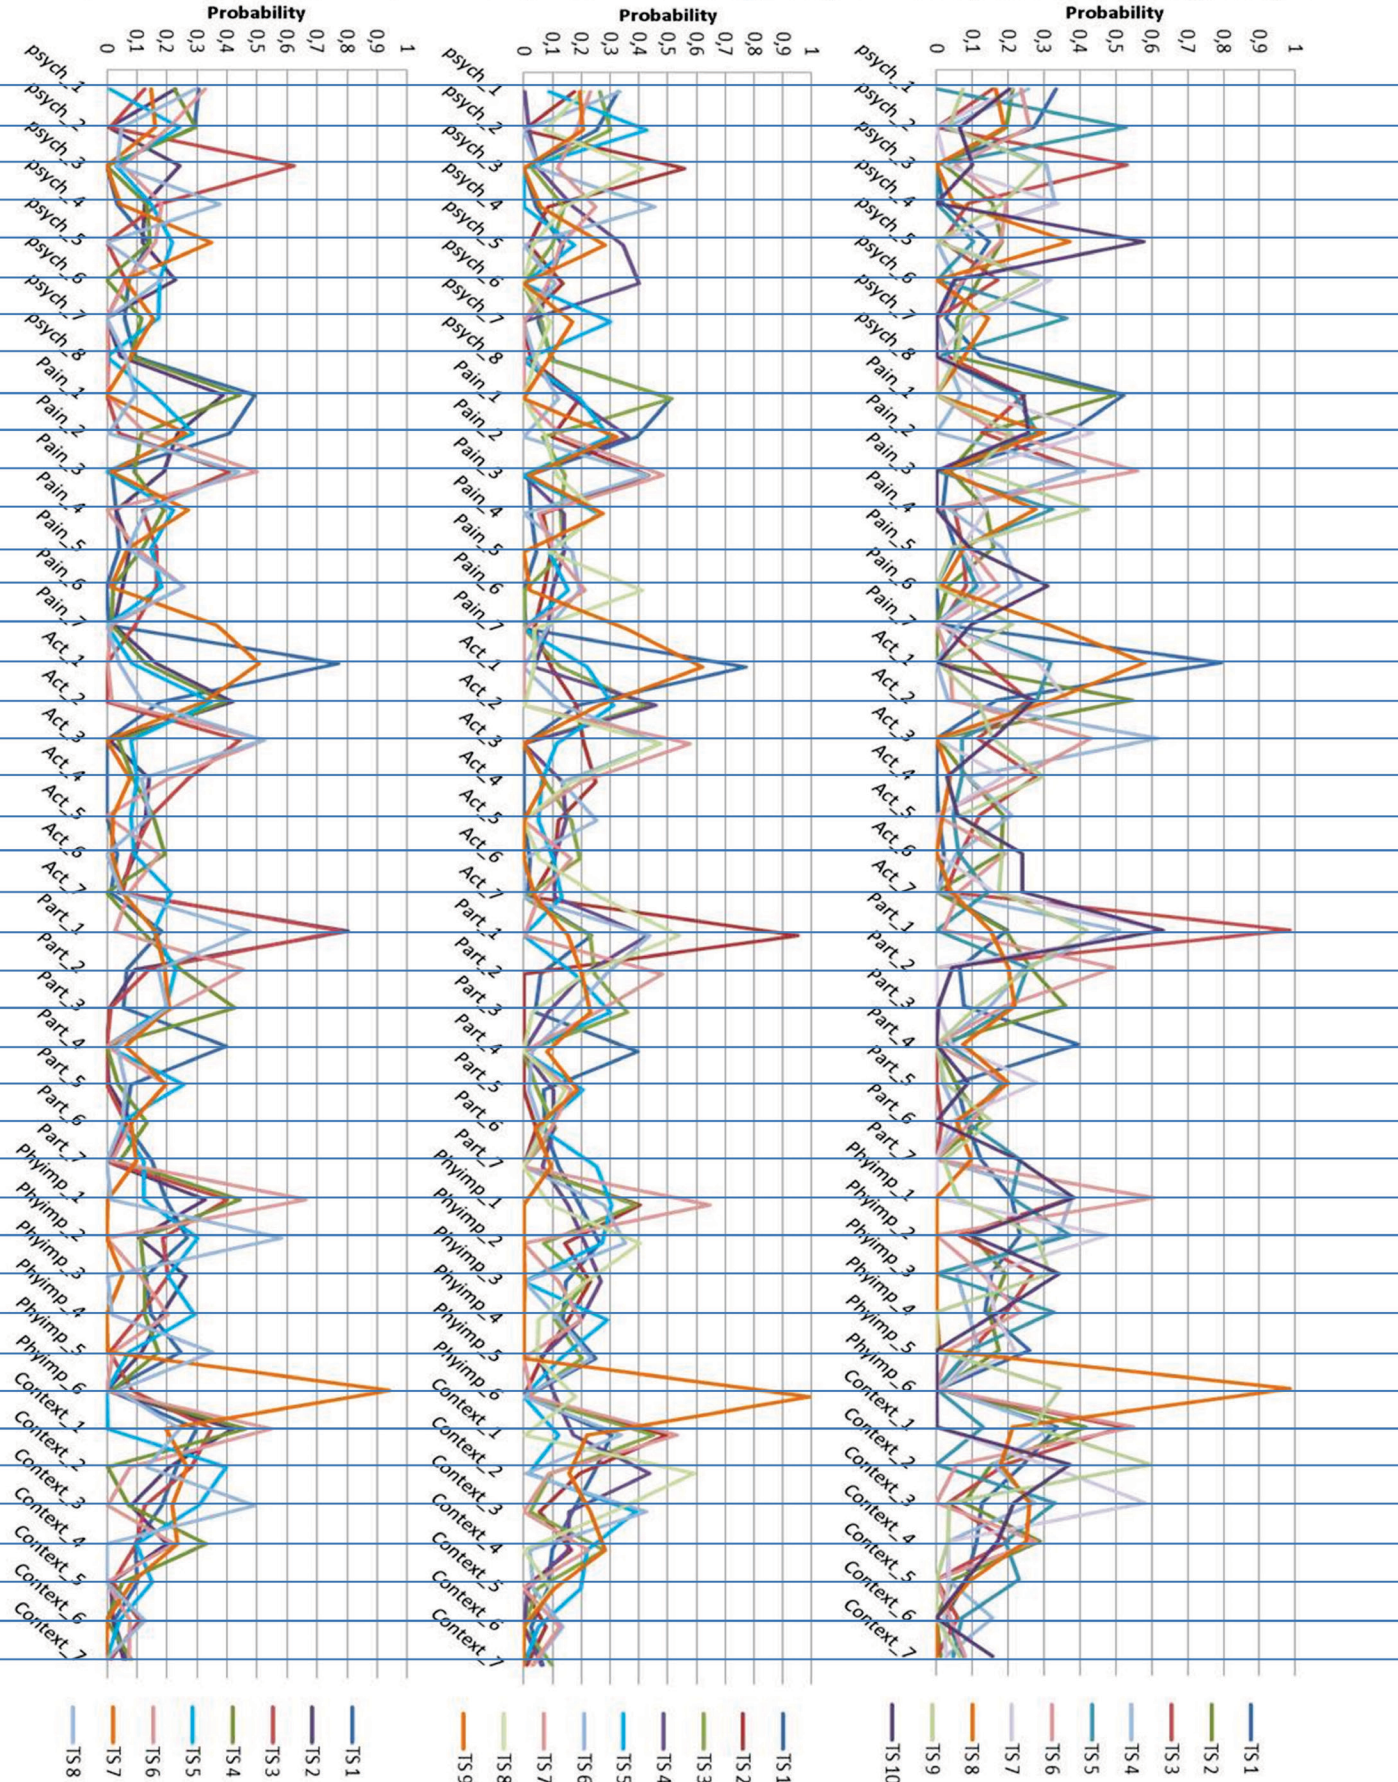

NOTE: Aggrav. = aggravated; AROM = active range of motion; BMI = body mass index; Ext = extension, Flex = flexion, LBP = low back pain; LP = leg pain; ND-LBP = non-dominating LBP; PW = physical workload; SI joint = sacroiliac joint, SPL = social participation limitations; TP = trigger points



**Table 3. Descriptive presentation of the domain-specific patient categories identified in the activity domain by the first stage of the two-stage LCA**

| Category<br>Variable                                         | Act 1                                                              | Act 2                                                              | Act 3                                                             | Act 4                                                      | Act 5                                                              | Act 6                                                      | Act 7                                                      | Scale                                       |
|--------------------------------------------------------------|--------------------------------------------------------------------|--------------------------------------------------------------------|-------------------------------------------------------------------|------------------------------------------------------------|--------------------------------------------------------------------|------------------------------------------------------------|------------------------------------------------------------|---------------------------------------------|
| Best activity is <i>not</i> to walk*                         | Half do not enjoy walking (47%)                                    | Few do not enjoy walking (25%)                                     | Few do not enjoy walking (29%)                                    | Few do not enjoy walking (33%)                             | Few do not enjoy walking (27%)                                     | Few do not enjoy walking (26%)                             | <b>Most do not enjoy walking (83%)</b>                     | <b>Dichotomous</b><br>0=no<br>1=yes         |
| Only stand for short periods of time (RMDQ-8)*               | Half only stand for short periods (59%)                            | Very few only stand for short periods (18%)                        | <b>Very few only stand for short periods (7%)</b>                 | <b>Very few only stand for short periods (3%)</b>          | <b>Very few only stand for short periods (5%)</b>                  | Very few only stand for short periods (16%)                | <b>Many only stand for short periods (61%)</b>             | <b>Dichotomous</b><br>0=no<br>1=yes         |
| Only walk short distances (RMDQ-14)*                         | <b>Most only walk short distances (98%)</b>                        | Few only walk short distances (21%)                                | <b>Very few only walk short distances (1%)</b>                    | <b>Very few only walk short distances (1%)</b>             | <b>Very few only walk short distances (1%)</b>                     | Most only walk short distances (16%)                       | <b>All only walk short distances (100%)</b>                | <b>Dichotomous</b><br>0=no<br>1=yes         |
| Only walked short distances (SBT-3)*                         | <b>Many have only walked short distances (69%)</b>                 | Few have only walked short distances (27%)                         | <b>Very few have only walked short distances (2%)</b>             | <b>Very few have only walked short distances (7%)</b>      | <b>Very few have only walked short distances (3%)</b>              | Very few have only walked short distances (19%)            | <b>Most have only walked short distances (86%)</b>         | <b>Dichotomous</b><br>0=disagree<br>1=agree |
| Use handrail to get upstairs (RMDQ-5)                        | <b>Most use handrail to get upstairs (88%)</b>                     | <b>Half use handrail to get upstairs (51%)</b>                     | <b>Very few use handrail to get upstairs (8%)</b>                 | Very few use handrail to get upstairs (11%)                | Few use handrail to get upstairs (35%)                             | Few use handrail to get upstairs (33%)                     | <b>Half use handrail to get upstairs (47%)</b>             | <b>Dichotomous</b><br>0=no<br>1=yes         |
| Hold on to something to get out of an easy chair (RMDQ-6)**  | <b>Most hold on to something to get out of an easy chair (94%)</b> | <b>Many hold on to something to get out of an easy chair (79%)</b> | <b>None hold on to something to get out of an easy chair (0%)</b> | Few hold on to something to get out of an easy chair (20%) | <b>Many hold on to something to get out of an easy chair (68%)</b> | Few hold on to something to get out of an easy chair (33%) | Few hold on to something to get out of an easy chair (31%) | <b>Dichotomous</b><br>0=no<br>1=yes         |
| Difficult to get out of a chair (RMDQ-10)**                  | <b>Most with difficulties getting out of a chair (96%)</b>         | <b>Most with difficulties getting out of a chair (95%)</b>         | <b>Very few with difficulties getting out of a chair (1%)</b>     | Few with difficulties getting out of a chair (25%)         | <b>Many with difficulties getting out of a chair (72%)</b>         | Few with difficulties getting out of a chair (33%)         | Few with difficulties getting out of a chair (22%)         | <b>Dichotomous</b><br>0=no<br>1=yes         |
| Difficult to turn over in bed (RMDQ-12)***                   | <b>Most with difficulties turning in bed (90%)</b>                 | <b>Most with difficulties turning in bed (84%)</b>                 | <b>Few with difficulties turning in bed (21%)</b>                 | Half with difficulties turning in bed (40%)                | Half with difficulties turning in bed (53%)                        | Half with difficulties turning in bed (40%)                | Half with difficulties turning in bed (53%)                | <b>Dichotomous</b><br>0=no<br>1=yes         |
| Try not to bend or kneel down (RMDQ-9)***                    | <b>Most try not to bend or kneel down (92%)</b>                    | <b>Most try not to bend or kneel down (80%)</b>                    | <b>Few try not to bend or kneel down (19%)</b>                    | Half try not to bend or kneel down (55%)                   | Half try not to bend or kneel down (58%)                           | Half try not to bend or kneel down (59%)                   | Half try not to bend or kneel down (51%)                   | <b>Dichotomous</b><br>0=no<br>1=yes         |
| Dressed more slowly last two weeks (SBT-4) <sup>†</sup>      | <b>Most have dressed more slowly (81%)</b>                         | <b>Most have dressed more slowly (96%)</b>                         | <b>Very few have dressed more slowly (10%)</b>                    | <b>All have dressed more slowly (100%)</b>                 | Very few have dressed more slowly (19%)                            | Few have dressed more slowly (25%)                         | Half have dressed more slowly (43%)                        | <b>Dichotomous</b><br>0=disagree<br>1=agree |
| Get dressed more slowly (RMDQ-7) <sup>‡</sup>                | <b>Most get dressed more slowly (98%)</b>                          | <b>Most get dressed more slowly (99%)</b>                          | <b>Very few get dressed more slowly (1%)</b>                      | <b>Most get dressed more slowly (98%)</b>                  | Few get dressed more slowly (34%)                                  | Very few get dressed more slowly (16%)                     | Few get dressed more slowly (33%)                          | <b>Dichotomous</b><br>0=no<br>1=yes         |
| Trouble putting on socks (RMDQ-13) <sup>‡</sup>              | <b>Most have trouble putting on socks (95%)</b>                    | <b>Most have trouble putting on socks (96%)</b>                    | <b>Very few have trouble putting on socks (3%)</b>                | <b>Most have trouble putting on socks (85%)</b>            | Half have trouble putting on socks (50%)                           | Few have trouble putting on socks (27%)                    | Few have trouble putting on socks (35%)                    | <b>Dichotomous</b><br>0=no<br>1=yes         |
| Walk more slowly (RMDQ-3) <sup>§§</sup>                      | <b>All walk more slowly (100%)</b>                                 | <b>Most walk more slowly (82%)</b>                                 | <b>Very few walk more slowly (16%)</b>                            | Few walk more slowly (33%)                                 | Half walk more slowly (44%)                                        | Half walk more slowly (49%)                                | <b>Most walk more slowly (94%)</b>                         | <b>Dichotomous</b><br>0=no<br>1=yes         |
| Go upstairs more slowly (RMDQ-18) <sup>§§</sup>              | <b>All go upstairs more slowly (100%)</b>                          | <b>Many go upstairs more slowly (78%)</b>                          | <b>Very few go upstairs more slowly (14%)</b>                     | Few go upstairs more slowly (26%)                          | Half go upstairs more slowly (44%)                                 | Half go upstairs more slowly (48%)                         | <b>Many go upstairs more slowly (73%)</b>                  | <b>Dichotomous</b><br>0=no<br>1=yes         |
| Avoid heavy jobs around the house (RMDQ-16) <sup>§§§</sup>   | <b>Most avoid heavy jobs (99%)</b>                                 | <b>Most avoid heavy jobs (86%)</b>                                 | <b>Few avoid heavy jobs (27%)</b>                                 | Half avoid heavy jobs (64%)                                | Half avoid heavy jobs (47%)                                        | <b>Most avoid heavy jobs (98%)</b>                         | <b>Most avoid heavy jobs (92%)</b>                         | <b>Dichotomous</b><br>0=no<br>1=yes         |
| Do less daily work around the house (RMDQ-22) <sup>§§§</sup> | <b>Most do less of the daily work (96%)</b>                        | <b>Most do less of the daily work (80%)</b>                        | <b>Very few do less of the daily work (10%)</b>                   | Few do less of the daily work (37%)                        | <b>Very few do less of the daily work (9%)</b>                     | <b>Most do less of the daily work (99%)</b>                | Many do less of the daily work (65%)                       | <b>Dichotomous</b><br>0=no<br>1=yes         |
| Not doing usual jobs around the house                        | <b>Most are not doing any usual jobs</b>                           | <b>Half are not doing any usual jobs</b>                           | <b>Very few are not doing any usual jobs</b>                      | Few are not doing any usual jobs                           | <b>Very few are not doing any usual jobs</b>                       | <b>Many are not doing any usual jobs</b>                   | Half are not doing any usual jobs                          | <b>Dichotomous</b><br>0=no                  |



| (RMDQ-4) <sup>RRH</sup>                                                             | (85%)                                                                                                                                                                                                                                                                                                                                                                                                                                                                                              | (60%)                                                                                                                                                                                                                                                                                                                                                 | (9%)                                                                                                                                                                                                                                                                                                                                                                                                                                                                      | (31%)                                                                                                                                                                                                                                                                | (17%)                                                                                                                                                                                                                                                                                                                                                        | (73%)                                                                                                                                  | (45%)                                                                                                                                                                                                                                                                                                                                          | 1=yes                                                                                                                                                                             |
|-------------------------------------------------------------------------------------|----------------------------------------------------------------------------------------------------------------------------------------------------------------------------------------------------------------------------------------------------------------------------------------------------------------------------------------------------------------------------------------------------------------------------------------------------------------------------------------------------|-------------------------------------------------------------------------------------------------------------------------------------------------------------------------------------------------------------------------------------------------------------------------------------------------------------------------------------------------------|---------------------------------------------------------------------------------------------------------------------------------------------------------------------------------------------------------------------------------------------------------------------------------------------------------------------------------------------------------------------------------------------------------------------------------------------------------------------------|----------------------------------------------------------------------------------------------------------------------------------------------------------------------------------------------------------------------------------------------------------------------|--------------------------------------------------------------------------------------------------------------------------------------------------------------------------------------------------------------------------------------------------------------------------------------------------------------------------------------------------------------|----------------------------------------------------------------------------------------------------------------------------------------|------------------------------------------------------------------------------------------------------------------------------------------------------------------------------------------------------------------------------------------------------------------------------------------------------------------------------------------------|-----------------------------------------------------------------------------------------------------------------------------------------------------------------------------------|
| <b>Cannot do physical activities which (might) make worse (FABQ-5) <sup>†</sup></b> | Many cannot do physical activities which (might) make my pain worse<br><br>Disagree=18%<br>Unsure=22%<br><b>Agree=60%</b>                                                                                                                                                                                                                                                                                                                                                                          | Half cannot do physical activities which (might) make my pain worse<br><br>Disagree=33%<br>Unsure=21%<br>Agree=46%                                                                                                                                                                                                                                    | Very few cannot do physical activities which (might) make my pain worse<br><br><b>Disagree=58%</b><br>Unsure=28%<br>Agree=14%                                                                                                                                                                                                                                                                                                                                             | Very few cannot do physical activities which (might) make my pain worse<br><br><b>Disagree=63%</b><br>Unsure=22%<br>Agree=15%                                                                                                                                        | Few cannot do physical activities which (might) make my pain worse<br><br><b>Disagree=57%</b><br>Unsure=18%<br>Agree=25%                                                                                                                                                                                                                                     | Half cannot do physical activities which (might) make my pain worse<br><br>Disagree=31%<br>Unsure=28%<br>Agree=41%                     | Few cannot do physical activities which (might) make my pain worse<br><br>Disagree=42%<br>Unsure=21%<br>Agree=38%                                                                                                                                                                                                                              | <b>Ordinal</b><br>0=completely disagree<br>3=unsure<br>6=completely agree<br><i>For description analysis, trichotomised:</i><br>0=disagree (0-2)<br>1=unsure (3)<br>2=agree (4-6) |
| <b>Cannot work with present pain (FABQ-13) <sup>†</sup></b>                         | <b>Half cannot work with present pain</b><br><br><b>Disagree=33%</b><br><b>Unsure=9%</b><br><b>Agree=58%</b>                                                                                                                                                                                                                                                                                                                                                                                       | Few cannot work with present pain<br><br>Disagree=68%<br>Unsure=7%<br>Agree=25%                                                                                                                                                                                                                                                                       | Very few cannot work with present pain<br><br><b>Disagree=91%</b><br>Unsure=5%<br>Agree=4%                                                                                                                                                                                                                                                                                                                                                                                | Very few cannot work with present pain<br><br><b>Disagree=91%</b><br>Unsure=4%<br>Agree=5%                                                                                                                                                                           | Very few cannot work with present pain<br><br><b>Disagree=81%</b><br>Unsure=7%<br>Agree=12%                                                                                                                                                                                                                                                                  | Few cannot work with present pain<br><br>Disagree=63%<br>Unsure=9%<br>Agree=28%                                                        | Few cannot work with present pain<br><br>Disagree=70%<br>Unsure=5%<br>Agree=24%                                                                                                                                                                                                                                                                | <b>Ordinal</b><br>0=disagree<br>1=unsure<br>2=agree                                                                                                                               |
| <b>Best posture to sit</b>                                                          | Few enjoy sitting (24%)                                                                                                                                                                                                                                                                                                                                                                                                                                                                            | Few enjoy sitting (21%)                                                                                                                                                                                                                                                                                                                               | Few enjoy sitting (23%)                                                                                                                                                                                                                                                                                                                                                                                                                                                   | <b>Very few enjoy sitting (12%)</b>                                                                                                                                                                                                                                  | Very few enjoy sitting (18%)                                                                                                                                                                                                                                                                                                                                 | Few enjoy sitting (33%)                                                                                                                | Few enjoy sitting (29%)                                                                                                                                                                                                                                                                                                                        | <b>Dichotomous</b><br>0=no<br>1=yes                                                                                                                                               |
| <b>Stay in bed most of the time (RMDQ-19)</b>                                       | <b>Very few stay in bed (19%)</b>                                                                                                                                                                                                                                                                                                                                                                                                                                                                  | Very few stay in bed (2%)                                                                                                                                                                                                                                                                                                                             | Very few stay in bed (0%)                                                                                                                                                                                                                                                                                                                                                                                                                                                 | Very few stay in bed (0%)                                                                                                                                                                                                                                            | Very few stay in bed (1%)                                                                                                                                                                                                                                                                                                                                    | Very few stay in bed (1%)                                                                                                              | Very few stay in bed (4%)                                                                                                                                                                                                                                                                                                                      | <b>Dichotomous</b><br>0=no<br>1=yes                                                                                                                                               |
| <b>Change position frequently (RMDQ-2)</b>                                          | Most change position frequently (92%)                                                                                                                                                                                                                                                                                                                                                                                                                                                              | Most change position frequently (92%)                                                                                                                                                                                                                                                                                                                 | <b>Many change position frequently (71%)</b>                                                                                                                                                                                                                                                                                                                                                                                                                              | Most change position frequently (83%)                                                                                                                                                                                                                                | Most change position frequently (90%)                                                                                                                                                                                                                                                                                                                        | Most change position frequently (84%)                                                                                                  | Most change position frequently (92%)                                                                                                                                                                                                                                                                                                          | <b>Dichotomous</b><br>0=no<br>1=yes                                                                                                                                               |
| <b>Labelling and clinical description</b>                                           | <b>Very high degree of disability (transfer/climbing, bending/turning, walking, dressing, household, work)</b><br><br><b>More</b><br>• with walking limitations ( <i>do not enjoy walking, only stand for a short period of time, have only walked and walks only short distances</i> )<br>• use handrail to get upstairs<br>• with difficulties getting out of a chair<br>• with difficulties turning over in bed<br>• try not to bend or kneel down<br>• with dressing problems<br>• walk slowly | <b>Very high degree of disability, but no walking distance limitation</b><br><br><b>More</b><br>• use handrail to get upstairs<br>• with difficulties getting out of a chair<br>• with difficulties turning over in bed<br>• try not to bend or kneel down<br>• with dressing problems<br>• walk slowly<br>• with difficulties doing household duties | <b>Very low degree of disability</b><br><br><b>Less</b><br>• with walking limitation<br>• Change position frequently<br>• use handrail to get upstairs<br>• with difficulties getting out of a chair<br>• with difficulties turning over in bed<br>• try not to bend or kneel down<br>• with dressing problems<br>• walk slowly<br>• with difficulties doing household duties<br>• cannot do physical activities which make pain worse<br>• cannot work with present pain | <b>Low degree of disability, but dressing problems</b><br><br><b>More</b><br>• with dressing problems<br><br><b>Less</b><br>• with walking limitation<br>• cannot do physical activities which make pain worse<br>• cannot work with present pain<br>• enjoy sitting | <b>Moderate degree of disability, no walking distance limitations (transfer and climbing problems, no trouble with normal household duties)</b><br><br><b>More</b><br>• with difficulties getting out of a chair<br><br><b>Less</b><br>• with walking limitation<br>• cannot do physical activities which make pain worse<br>• cannot work with present pain | <b>Low degree of disability, but difficulties in household duties</b><br><br><b>More</b><br>• with difficulties doing household duties | <b>Moderate degree of disability, high degree of walking limitations (speed and distance)</b><br><br><b>More</b><br>• with walking limitation ( <i>do not enjoy walking, only stand for a short period of time, have only walked and walks only short distances</i> )<br>• use handrail to get upstairs<br>• walk slowly<br>• avoid heavy jobs |                                                                                                                                                                                   |

|                                                |                                                                                                                                                                                                                             |                     |                      |                     |                      |                     |                     |  |
|------------------------------------------------|-----------------------------------------------------------------------------------------------------------------------------------------------------------------------------------------------------------------------------|---------------------|----------------------|---------------------|----------------------|---------------------|---------------------|--|
|                                                | <ul style="list-style-type: none"> <li>• with difficulties doing household duties</li> <li>• cannot do physical activities which make pain worse</li> <li>• cannot work with present pain</li> <li>• stay in bed</li> </ul> |                     |                      |                     |                      |                     |                     |  |
| <b>Category size, N</b>                        | 254 (27%)                                                                                                                                                                                                                   | 223 (24%)           | 137 (15%)            | 105 (11%)           | 79 (9%)              | 81 (9%)             | 49 (5%)             |  |
| <b>Posterior probability, median</b>           | 0.98<br>(IQR=88-100)                                                                                                                                                                                                        | 0.95<br>(IQR=83-99) | 0.99<br>(IQR=92-100) | 0.95<br>(IQR=80-99) | 0.96<br>(IQR=78-100) | 0.93<br>(IQR=87-98) | 0.96<br>(IQR=85-99) |  |
| <b>Posterior probability less than 0.70, N</b> | 27<br>(11%)                                                                                                                                                                                                                 | 30<br>(13%)         | 13<br>(9%)           | 18<br>(17%)         | 15<br>(19%)          | 12<br>(15%)         | 5<br>(10%)          |  |

**Bold** text indicates characteristic features which mainly identify the respective domain-specific patient categories

RMDQ = Roland-Morris Disability Questionnaire; FABQ = Fear-Avoidance Beliefs Questionnaire; SBT = STarT Back Tool; IQR = interquartile range

Symbols and light lines: Variables which have similar scoring pattern across domain-specific patient categories representing an overall feature:

\*Walking distance limitations

\*\*Transfer and climbing problems

\*\*\*Bending/turning challenges

† Dressing problems

‡ Walking speed limitations

‡‡ Difficulties in household duties

† Cannot work with present pain



Figure 2. Profile plot of the domain-specific patient categories identified in the activity domain by the first stage of the two-stage LCA

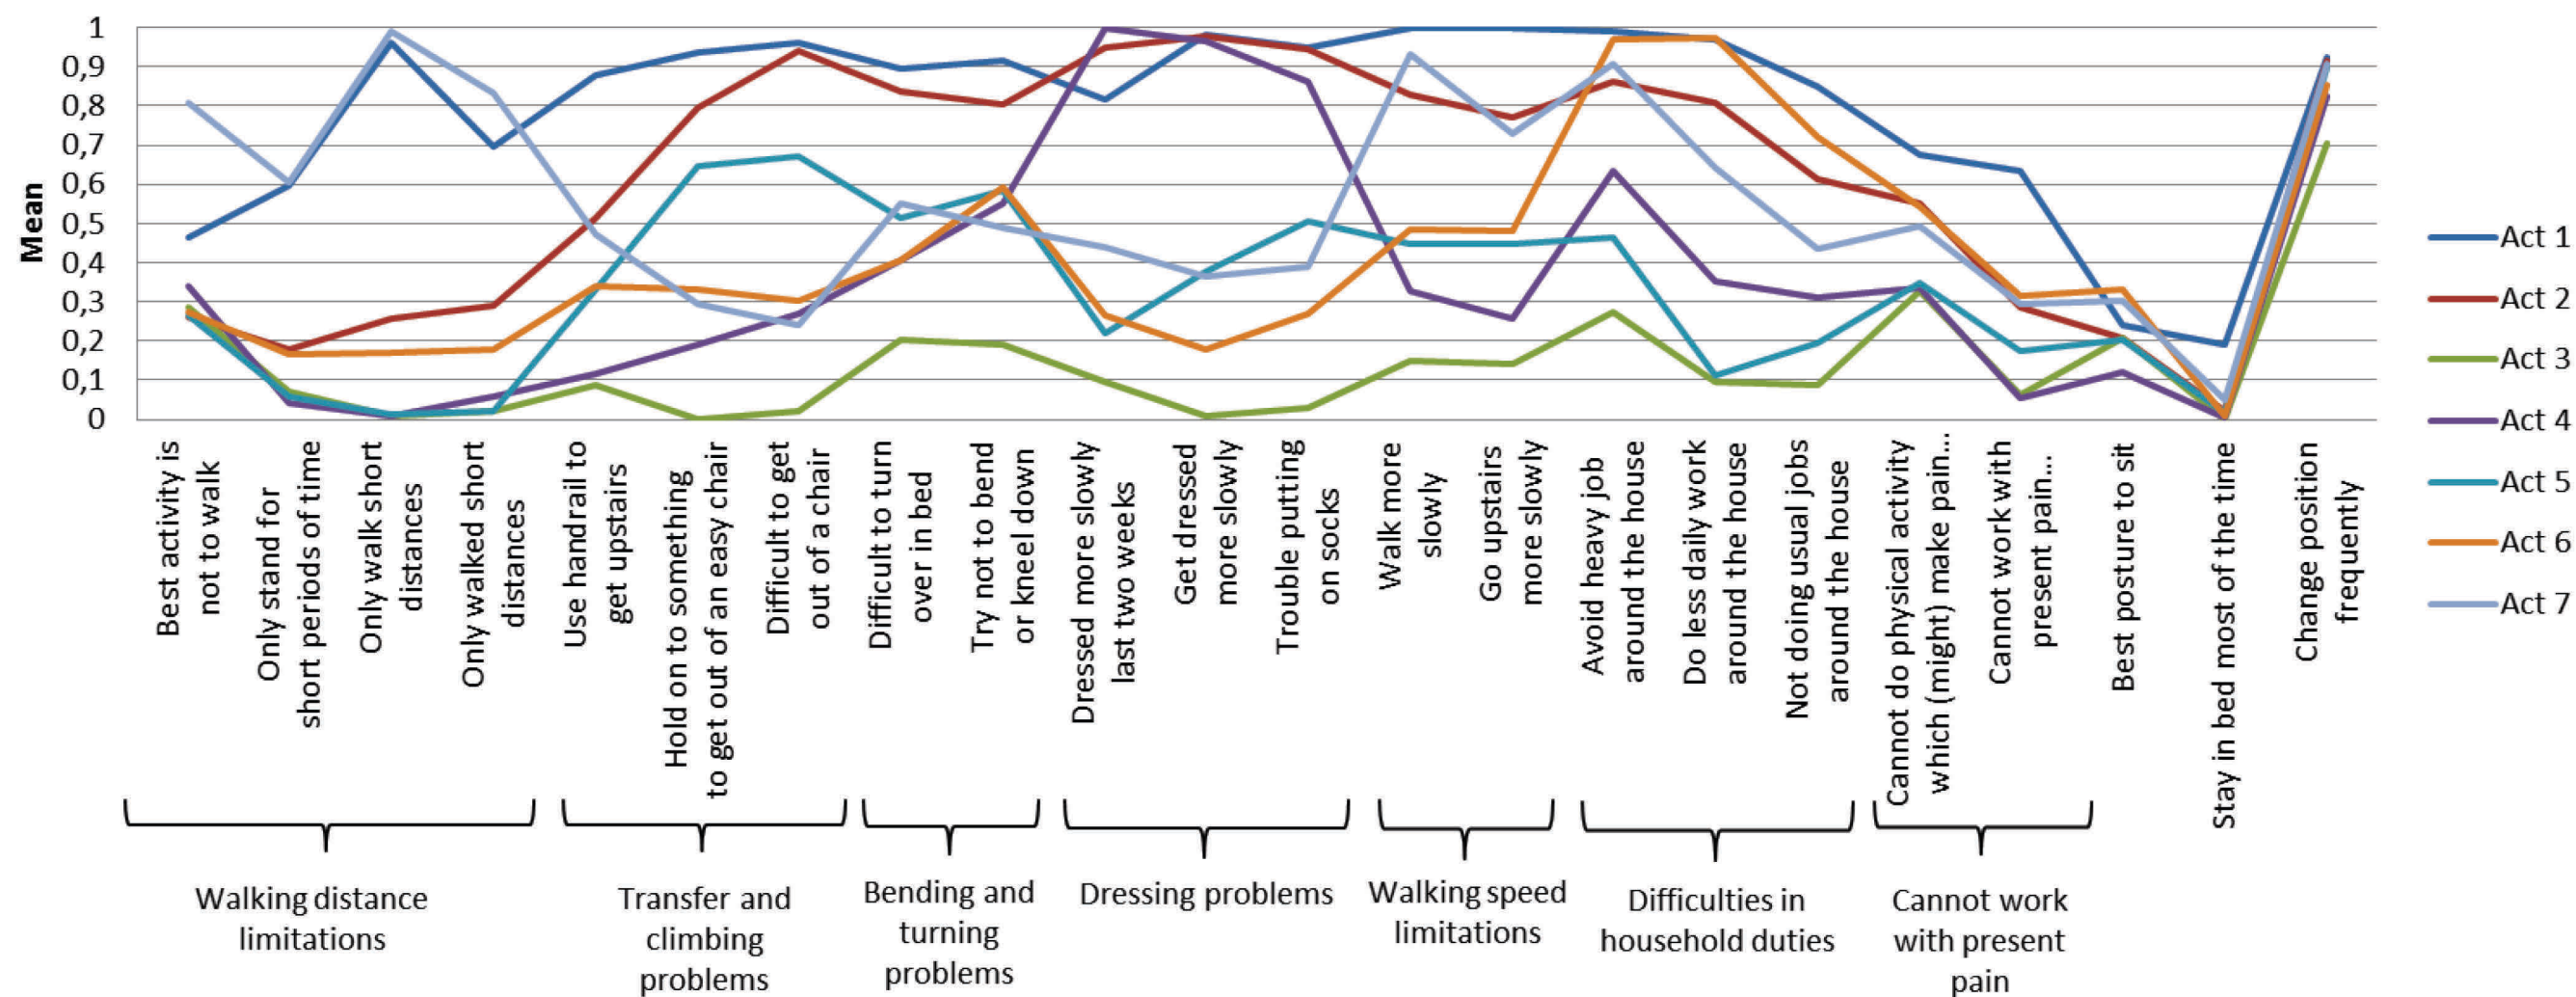

**Brief conceptual description of domain-specific patient categories identified in the activity domain (first stage of two-stage LCA):**

Act 1: Very high degree of disability (transfer/climbing, bending/turning, walking, dressing, household, work)

Act 2: Very high degree of disability, but no walking distance limitation

Act 3: Very low degree of disability

Act 4: Low degree of disability, but dressing problems

Act 5: Moderate degree of disability, no walking distance limitations

Act 6: Low degree of disability, but difficulties in household duties

Act 7: Moderate degree of disability, high degree of walking limitations (speed and distance)

**Table 4. Descriptive presentation of the domain-specific patient categories identified in the contextual factors domain by the first stage of the two-stage LCA**

| Category<br>Feature                                       | Context 1                                                                                                 | Context 2                                                                                            | Context 3                                                                                                                                      | Context 4                                                                                                                                     | Context 5                                                                      | Context 6                                                                                                | Context 7                                                                                                                                       | Scale                                                                                                                                                                                                |
|-----------------------------------------------------------|-----------------------------------------------------------------------------------------------------------|------------------------------------------------------------------------------------------------------|------------------------------------------------------------------------------------------------------------------------------------------------|-----------------------------------------------------------------------------------------------------------------------------------------------|--------------------------------------------------------------------------------|----------------------------------------------------------------------------------------------------------|-------------------------------------------------------------------------------------------------------------------------------------------------|------------------------------------------------------------------------------------------------------------------------------------------------------------------------------------------------------|
| <b>Age in years, median</b>                               | 42<br>(IQR=35-50)                                                                                         | 44<br>(IQR=36-53)                                                                                    | 46<br>(IQR=37-54)                                                                                                                              | 46<br>(IQR=37-55)                                                                                                                             | 32<br>(IQR=29-37)                                                              | 24<br>(IQR=22-26)                                                                                        | 64<br>(IQR=63-65)                                                                                                                               | <b>Continuous</b><br>18-66 years of age                                                                                                                                                              |
| <b>Sex</b>                                                | Males<br>(100%)                                                                                           | Very few males<br>(1%)                                                                               | No males<br>(0%)                                                                                                                               | Males<br>(100%)                                                                                                                               | Few males<br>(31%)                                                             | Half males<br>(50%)                                                                                      | Half males<br>(54%)                                                                                                                             | <b>Dichotomous</b><br>0=female<br>1=male                                                                                                                                                             |
| <b>Height, median</b>                                     | 182 cm<br>(IQR=178-187)                                                                                   | 169 cm (IQR=165-173)                                                                                 | 168 cm (IQR=165-172)                                                                                                                           | 181 cm (IQR=178-186)                                                                                                                          | 174 cm (IQR=170-180)                                                           | 179 cm (IQR=173-184)                                                                                     | 170 cm (IQR=167-178)                                                                                                                            | <b>Continuous</b><br>156-201 cm                                                                                                                                                                      |
| <b>BMI, median</b>                                        | 26<br>(IQR=24-28)                                                                                         | 24<br>(IQR=22-26)                                                                                    | 25<br>(IQR=22-28)                                                                                                                              | 27<br>(IQR=24-30)                                                                                                                             | 32<br>(IQR=28-37)                                                              | 23<br>(IQR=21-24)                                                                                        | 28<br>(IQR=24-33)                                                                                                                               | <b>Continuous</b><br>Range: 18-59                                                                                                                                                                    |
| <b>Work situation</b>                                     | Self-employed<br>(15%)<br>Full-time (80%)                                                                 | Self-employed (9%)<br>Full-time (59%)<br>Part-time (27%)                                             | Full-time (47%)<br>Part-time (30%)<br>Unemployed (6%)                                                                                          | Self-employed (20%)<br>Full-time (67%)<br>Unemployed (8%)                                                                                     | Full-time (56%)<br>Part-time (11%)<br>Student (24%)<br>Unemployed (9%)         | Full-time (5%)<br>Part-time (15%)<br>Student (78%)                                                       | Part-time (10%)<br>Early retirement/retired<br>(69%)<br>Health-related retirement<br>(21%)                                                      | <b>Multistate nominal</b><br>1=self-employed<br>2=full-time<br>3=part-time<br>4=student<br>5=unemployed<br>6=early retirement/retired<br>7=health-related retirement<br>8=other                      |
| <b>Comorbidity</b>                                        | Very <b>seldom</b><br>other chronic<br>disease (0%)<br><i>Other (1%,<br/>current/previous<br/>cancer)</i> | Very <b>seldom</b> other chronic<br>disease (0%)<br><i>Other (4%,<br/>'current/previous cancer')</i> | <b>All</b> with other chronic<br>disease (100%):<br>Heart (15%)<br>Asthma (20%)<br>Psychological (14%)<br>Musculoskeletal (34%)<br>Other (38%) | <b>All</b> with other chronic<br>disease (100%):<br>Heart (26%)<br>Asthma (20%)<br>Psychological (5%)<br>Musculoskeletal (32%)<br>Other (28%) | Very <b>seldom</b> other<br>chronic disease (4%)<br>Other (2%)                 | Very <b>seldom</b> other<br>chronic disease (18%):<br>Asthma (10%)<br>Musculoskeletal (8%)<br>Other (3%) | Very <b>often</b> other chronic<br>disease (85%):<br>Heart (44%)<br>Asthma (12%)<br>Psychological (10%)<br>Musculoskeletal (20%)<br>Other (32%) | <b>Dichotomous (6 items)</b><br>0=no<br>1=yes<br>No other chronic disease<br>Heart disease<br>Asthma<br>Psychological disease<br>Musculoskeletal disease<br>Other chronic disease                    |
| <b>Health insurance<br/>(private or work<br/>related)</b> | Half have health<br>insurance<br>(54%)                                                                    | Half have health insurance<br>(42%)                                                                  | Few have health<br>insurance<br>(38%)                                                                                                          | Half have health<br>insurance<br>(54%)                                                                                                        | Few have health<br>insurance<br>(44%)                                          | Very few have health<br>insurance<br>(8%)                                                                | Very few have health<br>insurance<br>(3%)                                                                                                       | <b>Dichotomous</b><br>0=no<br>1=yes<br><i>(reversed in the profile plot)</i>                                                                                                                         |
| <b>Highest educational<br/>level</b>                      | 1=6%<br><b>2=36%</b><br>3=14%<br><b>4=26%</b><br>5=19%                                                    | 1=4%<br>2=13%<br>3=19%<br><b>4=48%</b><br>5=16%                                                      | 1=7%<br>2=17%<br><b>3=20%</b><br><b>4=46%</b><br>5=10%                                                                                         | 1=7%<br><b>2=36%</b><br>3=10%<br><b>4=32%</b><br>5=15%                                                                                        | <b>1=24%</b><br><b>2=24%</b><br><b>3=22%</b><br><b>4=22%</b><br>5=7%           | <b>1=43%</b><br>2=5%<br>3=15%<br>4=18%<br><b>5=20%</b>                                                   | 1=16%<br><b>2=34%</b><br>3=11%<br><b>4=32%</b><br>5=8%                                                                                          | <b>Ordinal</b><br>1=no qualification<br>2=vocational training<br>3=higher education <3 years<br>4=higher education 3-4 years<br>5=higher education >4 years<br><i>(reversed in the profile plot)</i> |
| <b>Self-rated general<br/>health</b>                      | 75<br>(IQR=60-85)                                                                                         | 80<br>(IQR=60-86)                                                                                    | 70<br>(IQR=50-80)                                                                                                                              | 70<br>(IQR=53-80)                                                                                                                             | 40<br>(IQR=29-60)                                                              | 80<br>(IQR=70-85)                                                                                        | 61<br>(IQR=50-79)                                                                                                                               | <b>Continuous</b><br>Range: 0-100<br>0= lowest<br>100=highest<br><i>(reversed in the profile plot)</i>                                                                                               |
| <b>Smoking status</b>                                     | <b>Very few<br/>smokers</b><br>Smoker (19%)<br>Ex-smoker (22%)<br>Non-smoker<br>(59%)                     | <b>Very few smokers</b><br>Smoker (18%)<br>Ex-smoker (22%)<br>Non-smoker (61%)                       | <b>Few smokers</b><br>Smoker (22%)<br>Ex-smoker (23%)<br>Non-smoker (55%)                                                                      | <b>Few smokers</b><br>Smoker (21%)<br>Ex-smoker (28%)<br>Non-smoker (51%)                                                                     | <b>Very few smokers</b><br>Smoker (19%)<br>Ex-smoker (23%)<br>Non-smoker (58%) | <b>Very few smokers</b><br>Smoker (13%)<br>Ex-smoker (11%)<br>Non-smoker (76%)                           | <b>Very few smokers</b><br>Smoker (15%)<br>Ex-smoker (31%)<br>Non-smoker (54%)                                                                  | <b>Ordinal</b><br>1=smoker<br>2=ex-smoker<br>3=non-smoker<br><i>(reversed in the profile plot)</i>                                                                                                   |



|                                                |                                                                      |                                                                      |                                                                      |                                                                      |                                                                                      |                                                                                    |                                                                                       |                                                     |
|------------------------------------------------|----------------------------------------------------------------------|----------------------------------------------------------------------|----------------------------------------------------------------------|----------------------------------------------------------------------|--------------------------------------------------------------------------------------|------------------------------------------------------------------------------------|---------------------------------------------------------------------------------------|-----------------------------------------------------|
| <b>Claim for compensation</b>                  | Very few have a claim<br>Disagree (94%)<br>Unsure (4%)<br>Agree (3%) | Very few have a claim<br>Disagree (92%)<br>Unsure (3%)<br>Agree (5%) | Very few have a claim<br>Disagree (92%)<br>Unsure (4%)<br>Agree (4%) | Very few have a claim<br>Disagree (94%)<br>Unsure (1%)<br>Agree (5%) | None have a claim<br>Disagree (100%)<br>Unsure (0%)<br>Agree (0%)                    | Very few have a claim<br>Disagree (98%)<br>Unsure (0%)<br>Agree (3%)               | Very few have a claim<br>Disagree (91%)<br>Unsure (3%)<br>Agree (6%)                  | <b>Ordinal</b><br>0=disagree<br>1=unsure<br>2=agree |
| <b>Labelling and clinical description</b>      | Healthy males working full-time or self-employed                     | Healthy females working full-time or part-time                       | Females with comorbidity, working full-time or part-time             | Males with comorbidity, working full-time or self-employed           | Healthy patients in their 30s, higher BMI, working full-time, students or unemployed | Healthy students (approx. 25 years of age), lower BMI, fewer with health insurance | Retired patients (or working part-time) with comorbidity, fewer with health insurance |                                                     |
| <b>Category size, N</b>                        | 302 (33%)                                                            | 191 (21%)                                                            | 152 (16%)                                                            | 148 (16%)                                                            | 54 (6%)                                                                              | 40 (4%)                                                                            | 41 (4%)                                                                               |                                                     |
| <b>Posterior probability, median</b>           | 0.99<br>(IQR=0.97-1.00)                                              | 0.99<br>(IQR=97-100)                                                 | 1.00<br>(IQR=1.00-1.00)                                              | 1.00<br>(IQR=1.00-1.00)                                              | 0.99<br>(IQR=87-100)                                                                 | 0.99<br>(IQR=95-1.00)                                                              | 1.00<br>(IQR=0.99-1.00)                                                               |                                                     |
| <b>Posterior probability less than 0.70, N</b> | 8<br>(3%)                                                            | 8<br>(4%)                                                            | 1<br>(1%)                                                            | 3<br>(2%)                                                            | 6<br>(11%)                                                                           | 3<br>(8%)                                                                          | 0<br>(0%)                                                                             |                                                     |

**Bold** text indicates characteristic features which mainly identify the respective domain-specific patient categories

IQR = inter quartile range

Work situation: Only mentioned if percentage >5%

Figure 3. Profile plot of the domain-specific patient categories identified in the contextual factors domain by the first stage of the two-stage LCA

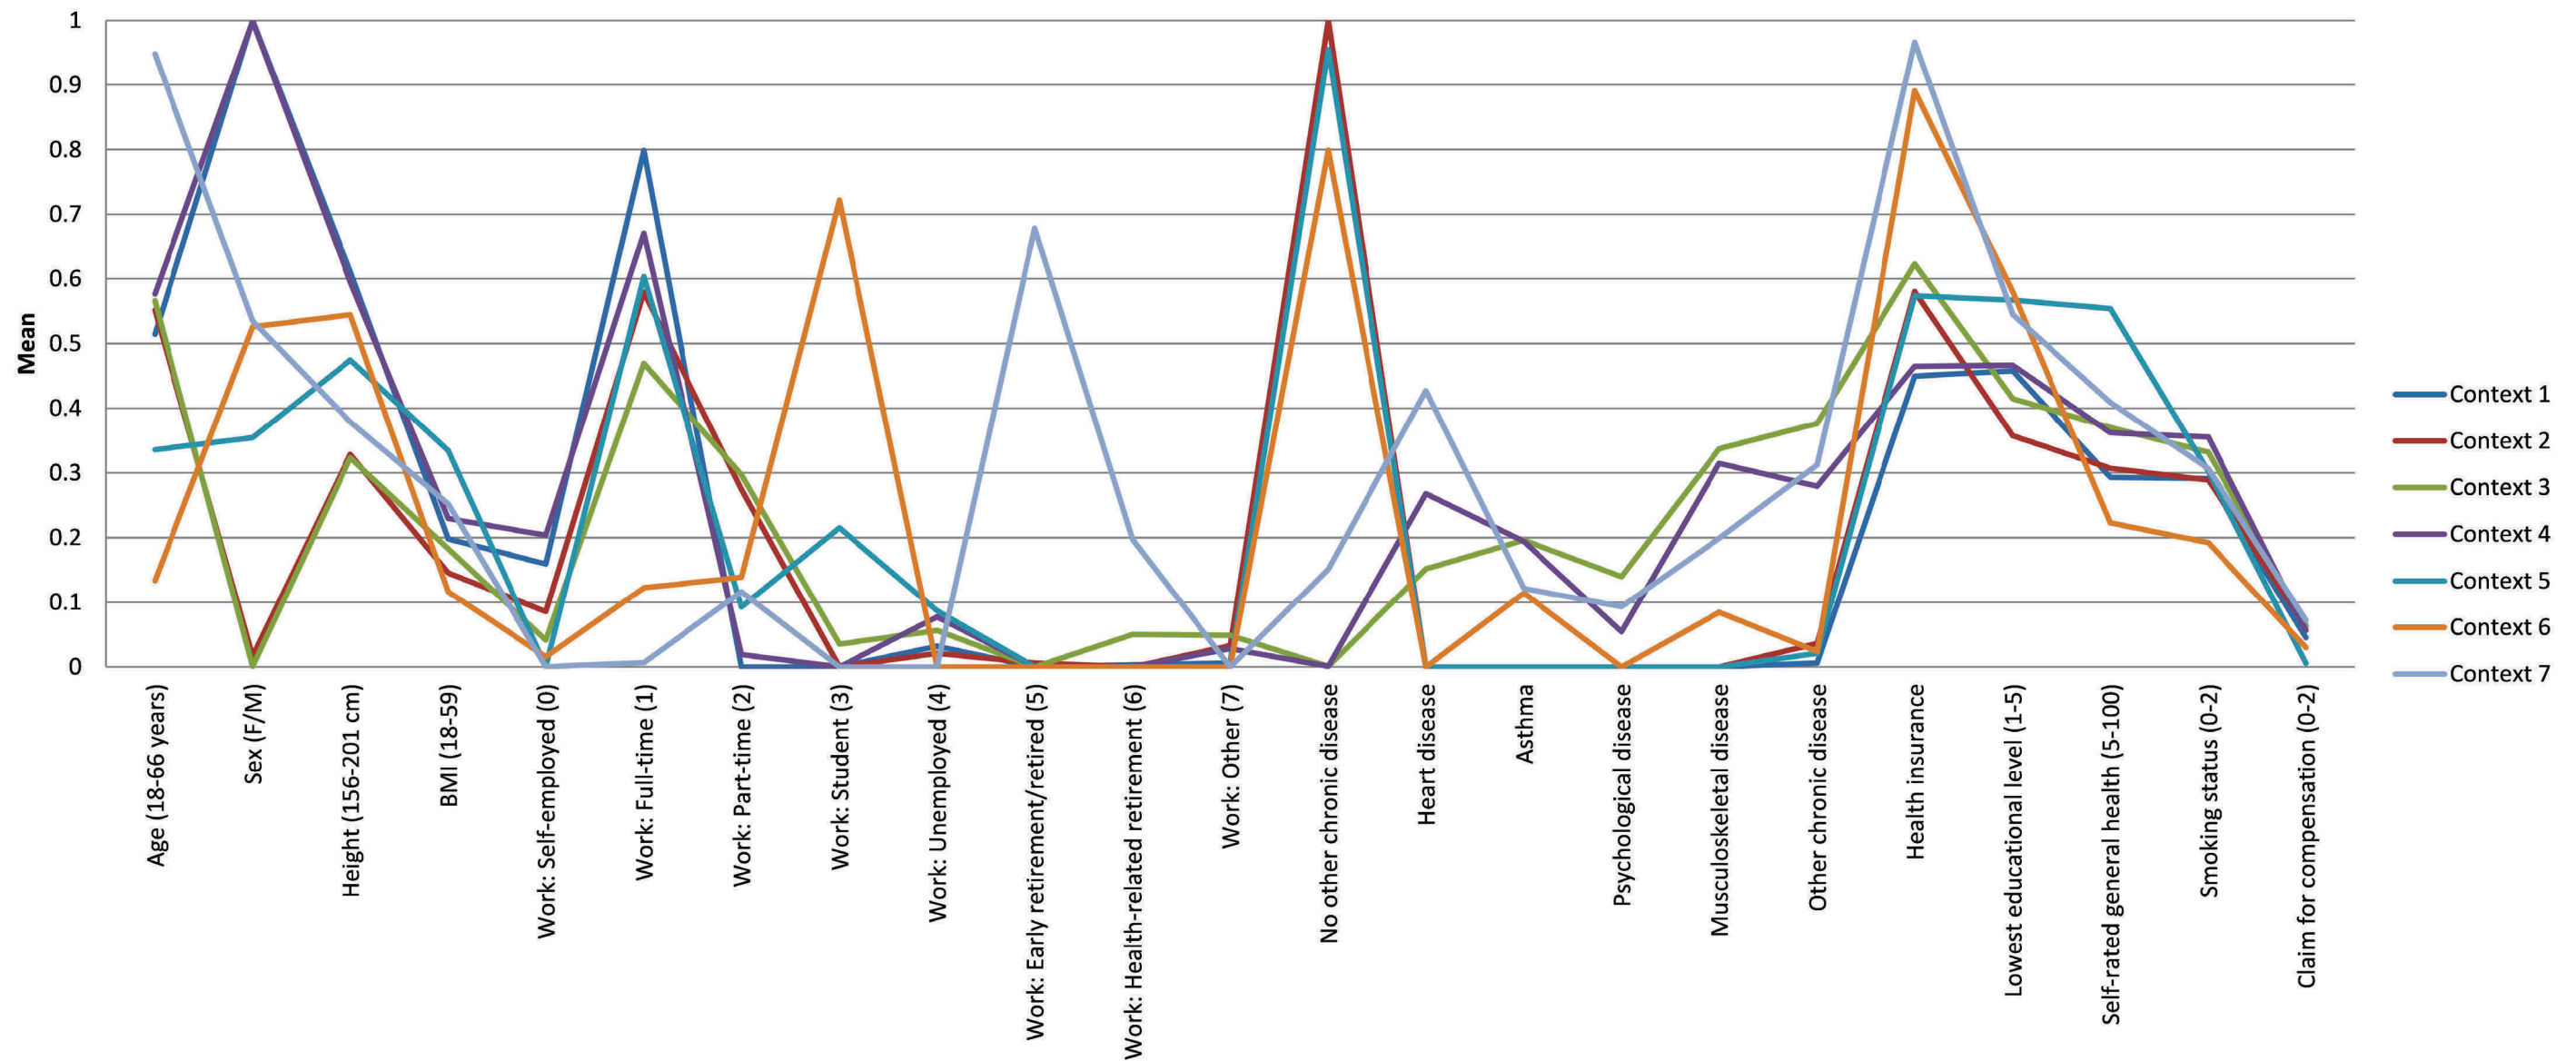

**Brief conceptual description of domain-specific patient categories identified in the contextual factors domain (First stage of two-stage LCA):**

- Context 1: Healthy males working full-time or self-employed
- Context 2: Healthy females working full-time or part-time
- Context 3: Females with comorbidity, working full-time or part-time
- Context 4: Males with comorbidity, working full-time or self-employed
- Context 5: Healthy patients in their 30s, higher BMI, working full-time, students or unemployed
- Context 6: Healthy students (approx. 25 years of age), lower BMI, fewer with health insurance
- Context 7: Retired patients (or working part-time) with comorbidity, fewer with health insurance



**Table 5. Descriptive presentation of the domain-specific patient categories identified in the pain domain by the first stage of the two-stage LCA**

| Category Variable                                                       | Pain 1                                                                                                                             | Pain 2                                                                                                                                            | Pain 3                                                                                                                           | Pain 4                                                                                                                                       | Pain 5                                                                                                                                           | Pain 6                                                                                                                            | Pain 7                                                                                                                                       | Scale                                                                                                                                                |
|-------------------------------------------------------------------------|------------------------------------------------------------------------------------------------------------------------------------|---------------------------------------------------------------------------------------------------------------------------------------------------|----------------------------------------------------------------------------------------------------------------------------------|----------------------------------------------------------------------------------------------------------------------------------------------|--------------------------------------------------------------------------------------------------------------------------------------------------|-----------------------------------------------------------------------------------------------------------------------------------|----------------------------------------------------------------------------------------------------------------------------------------------|------------------------------------------------------------------------------------------------------------------------------------------------------|
| <b>Previous LBP episodes</b>                                            | Half have had more than three episodes<br><br>None=15%<br>1-3=38%<br>>3=47%                                                        | Half have had more than three episodes<br><br>None=19%<br>1-3=37%<br>>3=44%                                                                       | Half have had more than three episodes<br><br>None=22%<br>1-3=35%<br>>3=42%                                                      | <b>Many have had more than three episodes</b><br><br>None=3%<br><b>1-3=21%</b><br><b>&gt;3=76%</b>                                           | Half have had more than three episodes<br><br>None=14%<br>1-3=40%<br>>3=46%                                                                      | Half have had more than three episodes<br><br>None=25%<br>1-3=23%<br>>3=52%                                                       | Half have had more than three episodes<br><br>None=8%<br>1-3=49%<br>>3=44%                                                                   | <b>Ordinal</b><br>0=no previous episodes<br>1=1-3 previous episodes<br>2=more than 3 previous episodes                                               |
| <b>Duration of LBP*</b>                                                 | <b>0-2 weeks duration of LBP</b><br><br>0-2 weeks=89%<br>2-4 weeks=8%<br>1-3 months=3%<br>>3 months=<1%                            | <b>0-2 weeks duration of LBP</b><br><br>0-2 weeks=79%<br>2-4 weeks=15%<br>1-3 months=4%<br>>3 months=2%                                           | 0-4 weeks duration of LBP<br><br>0-2 weeks=65%<br>2-4 weeks=22%<br>1-3 months=9%<br>>3 months=4%                                 | <b>More than 1 month duration of pain</b><br><br>0-2 weeks=13%<br>2-4 weeks=9%<br>1-3 months=31%<br>>3 months=46%                            | 0-4 weeks duration of LBP<br><br>0-2 weeks=59%<br>2-4 weeks=26%<br>1-3 months=6%<br>>3 months=9%                                                 | <b>More than 1 month duration of LBP</b><br><br>0-2 weeks=1%<br>2-4 weeks=1%<br>1-3 months=33%<br>>3 months=65%                   | 0-4 weeks duration of LBP<br><br>0-2 weeks=68%<br>2-4 weeks=15%<br>1-3 months=10%<br>>3 months=8%                                            | <b>Ordinal</b><br>1=0-2 weeks<br>2=2-4 weeks<br>3=1-3 months<br>4=>3 months                                                                          |
| <b>More than 30 days of LBP last year*</b>                              | Very few with more than 30 days of back pain last year (7%)                                                                        | Very few with more than 30 days of back pain last year (6%)                                                                                       | Very few with more than 30 days of back pain last year (5%)                                                                      | <b>Most with more than 30 days of back pain last year (98%)</b>                                                                              | Very few with more than 30 days of back pain last year (15%)                                                                                     | <b>All with more than 30 days of back pain last year (100%)</b>                                                                   | Very few with more than 30 days of back pain last year (5%)                                                                                  | <b>Dichotomous</b><br>0=≤ 30 days<br>1=>30 days                                                                                                      |
| <b>LBP intensity**</b>                                                  | <b>High intensity LBP (IQR=7-9)</b>                                                                                                | <b>High intensity LBP (IQR=7-8)</b>                                                                                                               | Moderate intensity LBP (IQR=3-6)                                                                                                 | <b>High intensity LBP (IQR=6-8)</b>                                                                                                          | Moderate intensity LBP (IQR=4-6)                                                                                                                 | Moderate intensity LBP (IQR=4-7)                                                                                                  | Moderate intensity LBP (IQR=3-7)                                                                                                             | <b>Continuous</b><br>0=no pain<br>10=worst imaginable pain                                                                                           |
| <b>Back/leg painful almost all the time (RMDQ-11)**</b>                 | Many with pain almost all the time (76%)                                                                                           | Many with pain almost all the time (77%)                                                                                                          | <b>Few with pain almost all the time (30%)</b>                                                                                   | <b>Most with pain almost all the time (84%)</b>                                                                                              | Many with pain almost all the time (62%)                                                                                                         | Many with pain almost all the time (61%)                                                                                          | Many with pain almost all the time (73%)                                                                                                     | <b>Dichotomous</b><br>0=no<br>1=yes                                                                                                                  |
| <b>Very-extremely bothersome back pain last 2 weeks (SBT-9)**</b>       | <b>Most with high degree of bothersome pain (96%)</b>                                                                              | <b>Most with high degree of bothersome pain (98%)</b>                                                                                             | <b>Very few with high degree of bothersome pain (7%)</b>                                                                         | <b>Most with high degree of bothersome pain (89%)</b>                                                                                        | Few with high degree of bothersome pain (24%)                                                                                                    | Half with high degree of bothersome pain (52%)                                                                                    | Many with high degree of bothersome pain (63%)                                                                                               | <b>Dichotomous</b><br>0=no-moderately bothersome pain<br>1=very-extremely bothersome pain                                                            |
| <b>LBP not dominating</b>                                               | No one LBP not dominating (0%)                                                                                                     | Very few LBP not dominating (4%)                                                                                                                  | Very few LBP not dominating (1%)                                                                                                 | Few LBP not dominating (25%)                                                                                                                 | No one LBP not dominating (0%)                                                                                                                   | No one LBP not dominating (0%)                                                                                                    | <b>All LBP not dominating (100%)</b>                                                                                                         | <b>Dichotomous</b><br>0=no<br>1=yes                                                                                                                  |
| <b>Leg pain intensity***</b>                                            | Most with no leg pain (81%)<br>Very few with low intensity leg pain (19%)<br>None with moderate-high intensity leg pain (0%)       | <b>Very few with no leg pain (1%)</b><br><b>Half with low intensity leg pain (53%)</b><br><b>Half with moderate-high intensity leg pain (46%)</b> | Most with no leg pain (88%)<br>Very few with low intensity leg pain (12%)<br>None with moderate-high intensity leg pain (0%)     | <b>None with no leg pain (0%)</b><br><b>Few with low intensity leg pain (22%)</b><br><b>Many with moderate-high intensity leg pain (78%)</b> | <b>Very few with no leg pain (2%)</b><br><b>Many with low intensity leg pain (71%)</b><br><b>Few with moderate-high intensity leg pain (27%)</b> | Half with no leg pain (55%)<br>Half with low intensity leg pain (45%)<br>None with moderate-high intensity leg pain (0%)          | <b>None with no leg pain (0%)</b><br><b>Few with low intensity leg pain (25%)</b><br><b>Many with moderate-high intensity leg pain (75%)</b> | <b>Ordinal</b><br>0=no pain<br>1=mild pain<br>2=moderate-worst imaginable pain                                                                       |
| <b>Pain has spread down leg(s) at some time last 2 weeks (SBT-1)***</b> | <b>Very few with spread of pain to leg(s) (3%)</b>                                                                                 | Most with spread of pain to leg(s) (82%)                                                                                                          | <b>None with spread of pain to leg(s) (0%)</b>                                                                                   | Most with spread of pain to leg(s) (92%)                                                                                                     | Most with spread of pain to leg(s) (89%)                                                                                                         | <b>Very few with spread of pain to leg(s) (10%)</b>                                                                               | All with spread of pain to leg(s) (100%)                                                                                                     | <b>Dichotomous</b><br>0=no<br>1=yes                                                                                                                  |
| <b>Pain distribution***</b>                                             | Most with LBP only<br><br>Only LBP (99%)<br>LBP and pain in one leg (<1%)<br>LBP and pain in both legs (<1%)<br>Only leg pain (0%) | Many with LBP only or LBP and pain in one leg<br><br>Only LBP (51%)<br>LBP and pain in one leg (37%)<br>LBP and pain in both legs (11%)           | Most with LBP only<br><br>Only LBP (97%)<br>LBP and pain in one leg (3%)<br>LBP and pain in both legs (1%)<br>Only leg pain (0%) | Very few with LBP only, most with leg pain in one leg<br><br>Only LBP (18%)<br>LBP and pain in one leg (64%)<br>LBP and pain in both legs    | Many with LBP only or LBP and pain in one leg<br><br>Only LBP (44%)<br>LBP and pain in one leg (53%)<br>LBP and pain in both legs (1%)           | Most with LBP only<br><br>Only LBP (89%)<br>LBP and pain in one leg (11%)<br>LBP and pain in both legs (0%)<br>Only leg pain (0%) | <b>None with LBP only, most with LBP and pain in one leg or only leg pain</b><br><br>Only LBP (0%)<br>LBP and pain in one leg (69%)          | <b>Multistate nominal</b><br>0=only low back pain<br>1=low back pain and pain in one leg<br>2=low back pain and pain in both legs<br>3=only leg pain |

|                                                               |                                                                                                                                                                                                                  |                                                                                                                                                                                                                                                                               |                                                                                                                                                                        |                                                                                                                                                                                                                                                                                                                                                                       |                                                                                                                                                                                                                    |                                                                                                                                                                                                                                              |                                                                                                                                                                                                                                                                                          |                                                                                                                                                                                   |
|---------------------------------------------------------------|------------------------------------------------------------------------------------------------------------------------------------------------------------------------------------------------------------------|-------------------------------------------------------------------------------------------------------------------------------------------------------------------------------------------------------------------------------------------------------------------------------|------------------------------------------------------------------------------------------------------------------------------------------------------------------------|-----------------------------------------------------------------------------------------------------------------------------------------------------------------------------------------------------------------------------------------------------------------------------------------------------------------------------------------------------------------------|--------------------------------------------------------------------------------------------------------------------------------------------------------------------------------------------------------------------|----------------------------------------------------------------------------------------------------------------------------------------------------------------------------------------------------------------------------------------------|------------------------------------------------------------------------------------------------------------------------------------------------------------------------------------------------------------------------------------------------------------------------------------------|-----------------------------------------------------------------------------------------------------------------------------------------------------------------------------------|
|                                                               |                                                                                                                                                                                                                  | Only leg pain (1%)                                                                                                                                                                                                                                                            |                                                                                                                                                                        | (14%)<br>Only leg pain (4%)                                                                                                                                                                                                                                                                                                                                           | Only leg pain (1%)                                                                                                                                                                                                 |                                                                                                                                                                                                                                              | LBP and pain in both legs (0%)<br>Only leg pain (31%)                                                                                                                                                                                                                                    |                                                                                                                                                                                   |
| <b>Pain in shoulder/neck last 2 weeks (SBT-2)</b>             | Half with shoulder/neck pain (42%)                                                                                                                                                                               | Half with shoulder/neck pain (46%)                                                                                                                                                                                                                                            | Half with shoulder/neck pain (42%)                                                                                                                                     | <b>Many with shoulder/neck pain (65%)</b>                                                                                                                                                                                                                                                                                                                             | <b>Many with shoulder/neck pain (62%)</b>                                                                                                                                                                          | Half with shoulder/neck pain (52%)                                                                                                                                                                                                           | <b>Few with shoulder/neck pain (33%)</b>                                                                                                                                                                                                                                                 | <b>Dichotomous</b><br>0=no<br>1=yes                                                                                                                                               |
| <b>No paraspinal pain onset</b>                               | Few with no paraspinal onset (31%)                                                                                                                                                                               | Few with no paraspinal onset (38%)                                                                                                                                                                                                                                            | Half with no paraspinal onset (41%)                                                                                                                                    | Half with no paraspinal onset (55%)                                                                                                                                                                                                                                                                                                                                   | Few with no paraspinal onset (34%)                                                                                                                                                                                 | Few with no paraspinal onset (36%)                                                                                                                                                                                                           | Half with no paraspinal onset (52%)                                                                                                                                                                                                                                                      | <b>Dichotomous</b><br>0=no<br>1=yes                                                                                                                                               |
| <b>Pain caused by physical activity (FABQ-1) <sup>†</sup></b> | Half had pain caused by physical activity<br><br>Disagree=27%<br>Unsure=28%<br>Agree=46%                                                                                                                         | Half had pain caused by physical activity<br><br>Disagree=26%<br>Unsure=27%<br>Agree=47%                                                                                                                                                                                      | Half had pain caused by physical activity<br><br>Disagree=32%<br>Unsure=25%<br>Agree=43%                                                                               | Half had pain caused by physical activity<br><br>Disagree=23%<br>Unsure=33%<br>Agree=44%                                                                                                                                                                                                                                                                              | Half had pain caused by physical activity<br><br>Disagree=31%<br>Unsure=22%<br>Agree=47%                                                                                                                           | Few had pain caused by physical activity<br><br>Disagree=33%<br>Unsure=31%<br>Agree=36%                                                                                                                                                      | Few had pain caused by physical activity<br><br>Disagree=32%<br>Unsure=34%<br>Agree=34%                                                                                                                                                                                                  | <b>Ordinal</b><br>0=completely disagree<br>3=unsure<br>6=completely agree<br><i>For description analysis, trichotomised:</i><br>0=disagree (0-2)<br>1=unsure (3)<br>2=agree (4-6) |
| <b>Physical activity makes worse (FABQ-2) <sup>†</sup></b>    | Half get worse by physical activity<br><br>Disagree=24%<br>Unsure=20%<br>Agree=56%                                                                                                                               | Half get worse by physical activity<br><br>Disagree=25%<br>Unsure=21%<br>Agree=54%                                                                                                                                                                                            | <b>Few get worse by physical activity</b><br><br><b>Disagree=47%</b><br><b>Unsure=16%</b><br><b>Agree=37%</b>                                                          | Half get worse by physical activity<br><br>Disagree=23%<br>Unsure=18%<br>Agree=59%                                                                                                                                                                                                                                                                                    | Half get worse by physical activity<br><br>Disagree=43%<br>Unsure=13%<br>Agree=44%                                                                                                                                 | Half get worse by physical activity<br><br>Disagree=39%<br>Unsure=13%<br>Agree=48%                                                                                                                                                           | Half get worse by physical activity<br><br>Disagree=37%<br>Unsure=22%<br>Agree=41%                                                                                                                                                                                                       | <b>Ordinal</b><br>0=completely disagree<br>3=unsure<br>6=completely agree<br><i>For description analysis, trichotomised:</i><br>0=disagree (0-2)<br>1=unsure (3)<br>2=agree (4-6) |
| <b>Labelling and clinical description</b>                     | <b>Recent LBP with high degree of back pain severity</b><br><br><b>More</b><br>• With high intensity LBP and high degree of bothersome pain<br><br><b>Less</b><br>• With long duration of LBP<br>• With leg pain | <b>Recent LBP with high degree of back pain severity and moderate degree of leg pain severity</b><br><br><b>More</b><br>• With high intensity LBP and high degree of bothersome pain<br>• With leg pain, low-high intensity<br><br><b>Less</b><br>• With long duration of LBP | <b>Recent LBP with low degree of back pain severity</b><br><br><b>Less</b><br>• With pain almost all the time<br>• With leg pain<br>• Get worse with physical activity | <b>Persistent LBP, high degree of back and leg pain severity (and musculoskeletal comorbidity)</b><br><br><b>More</b><br>• Previous episodes<br>• With long duration of LBP, >30 days last year<br>• With high intensity LBP and high degree of bothersome pain<br>• With pain almost all the time<br>• Moderate-high intensity leg pain<br>• With neck/shoulder pain | <b>Recent LBP with moderate degree of back pain severity, moderate degree of leg pain severity (and often neck/shoulder pain)</b><br><br><b>More</b><br>• With low intensity leg pain<br>• With neck/shoulder pain | <b>Persistent LBP, moderate degree of back pain severity and low degree of leg pain severity</b><br><br><b>More</b><br>• With long duration of LBP, >30 days last year<br><br><b>Less</b><br>• With leg pain (if present, was low intensity) | <b>Recent LBP, moderate degree of back pain severity, moderate to high degree of leg pain severity, non-dominating LBP</b><br><br><b>More</b><br>• With LBP not dominating<br>• Moderate-high intensity leg pain<br>• With only leg pain<br><br><b>Less</b><br>• With neck/shoulder pain |                                                                                                                                                                                   |
| <b>Category size, N</b>                                       | 252 (27%)                                                                                                                                                                                                        | 203 (22%)                                                                                                                                                                                                                                                                     | 160 (17%)                                                                                                                                                              | 98 (11%)                                                                                                                                                                                                                                                                                                                                                              | 89 (10%)                                                                                                                                                                                                           | 84 (9%)                                                                                                                                                                                                                                      | 42 (5%)                                                                                                                                                                                                                                                                                  |                                                                                                                                                                                   |
| <b>Posterior probability, median</b>                          | 0.97 (IQR=80-99)                                                                                                                                                                                                 | 0.96 (IQR=84-98)                                                                                                                                                                                                                                                              | 0.97 (IQR=82-100)                                                                                                                                                      | 0.98 (IQR=88-99)                                                                                                                                                                                                                                                                                                                                                      | 0.93 (IQR=75-99)                                                                                                                                                                                                   | 0.96 (IQR=85-99)                                                                                                                                                                                                                             | 0.99 (IQR=84-100)                                                                                                                                                                                                                                                                        |                                                                                                                                                                                   |
| <b>Posterior probability less than 0.70, N</b>                | 38 (15%)                                                                                                                                                                                                         | 29 (14%)                                                                                                                                                                                                                                                                      | 20 (13%)                                                                                                                                                               | 11 (11%)                                                                                                                                                                                                                                                                                                                                                              | 18 (20%)                                                                                                                                                                                                           | 8 (10%)                                                                                                                                                                                                                                      | 5 (12%)                                                                                                                                                                                                                                                                                  |                                                                                                                                                                                   |

---

**Bold** text indicates characteristic features which mainly identify the respective domain-specific patient categories

LBP = low back pain; IQR = inter quartile range; RMDQ = Roland-Morris Disability Questionnaire; FABQ = Fear-Avoidance Beliefs Questionnaire; SBT = STarT Back Tool

Symbols and light lines: Variables which have similar scoring pattern across categories representing an overall feature:

\*LBP duration

\*\*Back pain severity

\*\*\*Leg pain severity

‡Pain due to physical activity (not a diverse scoring and therefore not fulfilling the criteria for being a feature)



Figure 4. Profile plot of the domain-specific patient categories identified in the pain domain by the first stage of the two-stage LCA

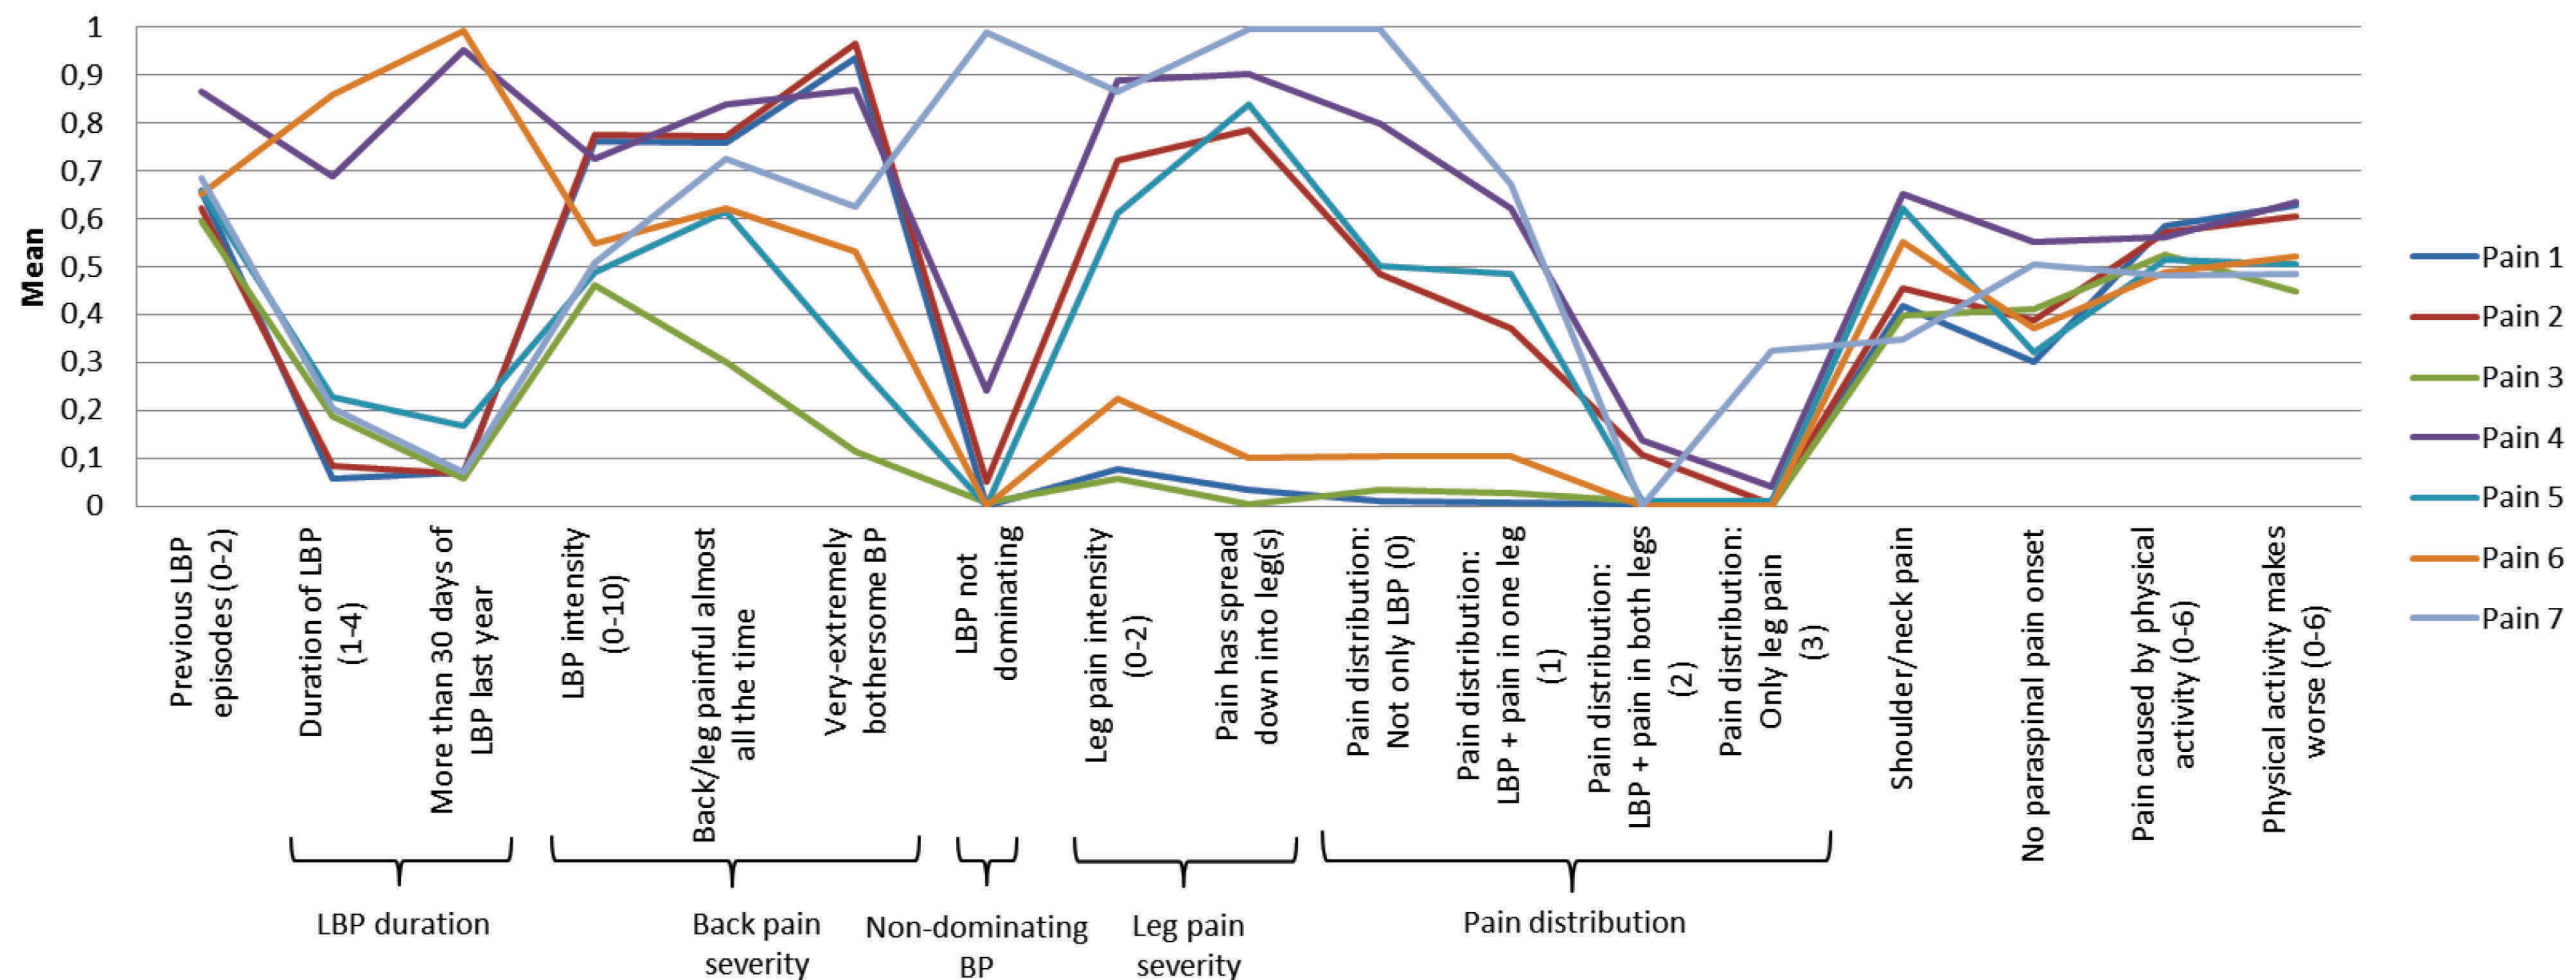

**Brief conceptual description of domain-specific patient categories identified in the pain domain (first stage of two-stage LCA):**

Pain 1: Recent LBP with high degree of back pain severity

Pain 2: Recent LBP with high degree of back pain severity and moderate degree of leg pain severity

Pain 3: Recent LBP with low degree of back pain severity

Pain 4: Persistent LBP, high degree of back and leg pain severity

Pain 5: Recent LBP with moderate degree of back pain severity, moderate degree of leg pain severity

Pain 6: Persistent LBP, moderate degree of back pain severity and low degree of leg pain severity

Pain 7: Recent LBP, moderate degree of back pain severity, moderate-high degree of leg pain severity, non-dominating BP

LBP = low back pain

**Table 6. Descriptive presentation of the domain-specific patient categories identified in the participation domain by the first stage of the two-stage LCA**

| Category<br>Variable                                 | Part 1                                                                                                                                                                                              | Part 2                                                                                                                                                                                        | Part 3                                                                                                                                                                                         | Part 4                                                                                                                                                                              | Part 5                                                                                                                                                                  | Part 6                                                                                                                                                                                                           | Part 7                                                                                                                                                                                    | Scale                                                                                                  |
|------------------------------------------------------|-----------------------------------------------------------------------------------------------------------------------------------------------------------------------------------------------------|-----------------------------------------------------------------------------------------------------------------------------------------------------------------------------------------------|------------------------------------------------------------------------------------------------------------------------------------------------------------------------------------------------|-------------------------------------------------------------------------------------------------------------------------------------------------------------------------------------|-------------------------------------------------------------------------------------------------------------------------------------------------------------------------|------------------------------------------------------------------------------------------------------------------------------------------------------------------------------------------------------------------|-------------------------------------------------------------------------------------------------------------------------------------------------------------------------------------------|--------------------------------------------------------------------------------------------------------|
| <b>Days with sick leave last month*</b>              | <b>Most with no sick leave (92%)</b><br>Very few with 2-5 days of sick leave (8%)                                                                                                                   | <b>Most with no sick leave (94%)</b><br>Very few with 2-5 days of sick leave (6%)                                                                                                             | Most with no sick leave (84%)<br>Very few with 2-5 days of sick leave (16%)                                                                                                                    | Few with no sick leave (33%)<br><b>Many with 2-5 days of sick leave (64%)</b><br>Very few with 6-31 days of sick leave (4%)                                                         | Many with no sick leave (68%)<br>Few with 2-5 days of sick leave (30%)<br>Very few with 6-31 days of sick leave (1%)                                                    | Many with no sick leave (77%)<br>Few with 2-5 days of sick leave (20%)<br>Very few with 6-31 days of sick leave (3%)                                                                                             | Few with no sick leave (22%)<br><b>Half with 2-5 days of sick leave (52%)</b><br><b>Few with 6-31 days of sick leave (26%)</b>                                                            | <b>Ordinal</b><br>0=0 days<br>1=1-5 days (workweek)<br>2=6-31 days                                     |
| <b>Decreased sexual activity (RMDQ-20)*</b>          | Few with decreased sexual activity (28%)                                                                                                                                                            | Few with decreased sexual activity (20%)                                                                                                                                                      | Few with decreased sexual activity (25%)                                                                                                                                                       | <b>Many with decreased sexual activity (79%)</b>                                                                                                                                    | Half with decreased sexual activity (43%)                                                                                                                               | Few with decreased sexual activity (26%)                                                                                                                                                                         | <b>Many with decreased sexual activity (74%)</b>                                                                                                                                          | <b>Dichotomous</b><br>0=no<br>1=yes                                                                    |
| <b>Stay home most of the time (RMDQ-1)*</b>          | Very few stay home most of the time (9%)                                                                                                                                                            | None stay home most of the time (0%)                                                                                                                                                          | Very few stay home most of the time (2%)                                                                                                                                                       | <b>Most stay home most of the time (89%)</b>                                                                                                                                        | Few stay home most of the time (29%)                                                                                                                                    | Very few stay home most of the time (10%)                                                                                                                                                                        | <b>Most stay home most of the time (86%)</b>                                                                                                                                              | <b>Dichotomous</b><br>0=no<br>1=yes                                                                    |
| <b>Work is too heavy (FABQ-9)</b>                    | <b>None believe work is too heavy</b><br><br>Disagree=100%<br><b>Agree=0%</b>                                                                                                                       | Few believe work is too heavy<br><br>Disagree=74%<br>Unsure=19%<br>Agree=7%                                                                                                                   | <b>Half believe work is too heavy</b><br><br>Disagree=19%<br>Unsure=23%<br><b>Agree=58%</b>                                                                                                    | Few believe work is too heavy<br><br>Disagree=71%<br>Unsure=9%<br>Agree=19%                                                                                                         | <b>None believe work is too heavy</b><br><br>Disagree=99%<br>Unsure=1%<br><b>Agree=0%</b>                                                                               | <b>None believe work is too heavy</b><br><br>Disagree=100%<br><b>Agree=0%</b>                                                                                                                                    | <b>Half believe work is too heavy</b><br><br>Disagree=29%<br>Unsure=13%<br><b>Agree=58%</b>                                                                                               | <b>Ordinal</b><br>0=disagree<br>1=unsure<br>2=agree                                                    |
| <b>Work makes/would make pain worse (FABQ-10)</b>    | <b>None believe work makes pain worse</b><br><br>Disagree=100%<br><b>Agree=0%</b>                                                                                                                   | Few believe work makes pain worse<br><br>Disagree=22%<br><b>Unsure=54%</b><br>Agree=24%                                                                                                       | <b>Most believe work makes pain worse</b><br><br>Disagree=2%<br>Unsure=12%<br><b>Agree=86%</b>                                                                                                 | Few believe work makes pain worse<br><br>Disagree=41%<br>Unsure=36%<br>Agree=24%                                                                                                    | Half believe work makes pain worse<br><br>Disagree=32%<br>Unsure=26%<br>Agree=42%                                                                                       | <b>None believe work makes pain worse</b><br><br>Disagree=94%<br>Unsure=6%<br>Agree=0%                                                                                                                           | <b>Most believe work makes pain worse</b><br><br>Disagree=0%<br><b>Unsure=11%</b><br><b>Agree=89%</b>                                                                                     | <b>Ordinal</b><br>0=disagree<br>1=unsure<br>2=agree                                                    |
| <b>Work-aggravated pain (FABQ-7)</b>                 | <b>None believe work aggravated pain</b><br><br>Disagree=93%<br>Unsure=7%<br><b>Agree=0%</b>                                                                                                        | Few believe work aggravated pain<br><br>Disagree=35%<br><b>Unsure=51%</b><br>Agree=14%                                                                                                        | <b>Most believe work aggravated pain</b><br><br>Disagree=0%<br>Unsure=17%<br><b>Agree=83%</b>                                                                                                  | Very few believe work aggravated pain<br><br>Disagree=65%<br>Unsure=29%<br>Agree=6%                                                                                                 | <b>Most believe work aggravated pain</b><br><br>Disagree=0%<br>Unsure=8%<br><b>Agree=92%</b>                                                                            | Few believe work aggravated pain<br><br>Disagree=44%<br>Unsure=31%<br>Agree=24%                                                                                                                                  | <b>Most believe work aggravated pain</b><br><br>Disagree=0%<br>Unsure=13%<br><b>Agree=88%</b>                                                                                             | <b>Ordinal</b><br>0=disagree<br>1=unsure<br>2=agree                                                    |
| <b>Pain caused by work/accident at work (FABQ-6)</b> | <b>None believe pain caused by work/accident at work</b><br><br>Disagree=100%<br><b>Agree=0%</b>                                                                                                    | Very few believe pain caused by work/accident at work<br><br>Disagree=69%<br><b>Unsure=28%</b><br>Agree=3%                                                                                    | Many believe pain caused by work/accident at work<br><br>Disagree=20%<br>Unsure=18%<br>Agree=61%                                                                                               | Very few believe pain caused by work/accident at work<br><br>Disagree=74%<br>Unsure=20%<br>Agree=6%                                                                                 | Few believe pain caused by work/accident at work<br><br>Disagree=40%<br>Unsure=29%<br>Agree=31%                                                                         | <b>Most believe pain caused by work/accident at work</b><br><br>Disagree=0%<br>Unsure=10%<br><b>Agree=90%</b>                                                                                                    | <b>Many believe pain caused by work/accident at work</b><br><br>Disagree=13%<br>Unsure=14%<br><b>Agree=73%</b>                                                                            | <b>Ordinal</b><br>0=disagree<br>1=unsure<br>2=agree                                                    |
| <b>Physical workload</b>                             | Sitting and walking at work<br><br><b>Few only sit at work (30%)</b><br><b>Half sit and walk at work (50%)</b><br>Very few have light physical load (15%)<br>Very few have heavy physical load (4%) | Sitting and walking / low physical load<br><br>Few only sit at work (20%)<br>Half sit and walk at work (41%)<br>Few have light physical load (24%)<br>Very few have heavy physical load (16%) | Low-high physical load<br><br>Very few only sit at work (5%)<br>Very few sit and walk at work (11%)<br><b>Few have light physical load (23%)</b><br><b>Many have heavy physical load (61%)</b> | Low physical load (unspecific)<br><br>Very few only sit at work (17%)<br>Few sit and walk at work (27%)<br>Few have light physical load (30%)<br>Few have heavy physical load (26%) | Sit at work<br><br><b>Many only sit at work (77%)</b><br>Few sit and walk at work (21%)<br>Very few have light physical load (1%)<br>None have heavy physical load (0%) | Sitting and walking / low physical load<br><br>Very few only sit at work (3%)<br><b>Few sit and walk at work (32%)</b><br><b>Few have light physical load (36%)</b><br><b>Few have heavy physical load (29%)</b> | Low-high physical load<br><br>None only sit at work (0%)<br>Very few sit and walk at work (9%)<br><b>Few have light physical load (29%)</b><br><b>Many have heavy physical load (62%)</b> | <b>Ordinal</b><br>1=sitting<br>2=sitting and walking<br>3=light physical load<br>4=heavy physical load |

|                                           |                                                                                                                                                                                                                                                                                                                                                                                                                  |                                                                                                                                                                                                                           |                                                                                                                                                                                                                                                                                                                                                                                                                                                    |                                                                                                                                                                                                                                                                                                                                                                   |                                                                                                                                                                                                                                                                                                                                                                                                                 |                                                                                                                                                                                                                                                                                                                                                                             |                                                                                                                                                                                                                                                                                                                                                                                                                                                                                                                                                                                                                                 |                     |
|-------------------------------------------|------------------------------------------------------------------------------------------------------------------------------------------------------------------------------------------------------------------------------------------------------------------------------------------------------------------------------------------------------------------------------------------------------------------|---------------------------------------------------------------------------------------------------------------------------------------------------------------------------------------------------------------------------|----------------------------------------------------------------------------------------------------------------------------------------------------------------------------------------------------------------------------------------------------------------------------------------------------------------------------------------------------------------------------------------------------------------------------------------------------|-------------------------------------------------------------------------------------------------------------------------------------------------------------------------------------------------------------------------------------------------------------------------------------------------------------------------------------------------------------------|-----------------------------------------------------------------------------------------------------------------------------------------------------------------------------------------------------------------------------------------------------------------------------------------------------------------------------------------------------------------------------------------------------------------|-----------------------------------------------------------------------------------------------------------------------------------------------------------------------------------------------------------------------------------------------------------------------------------------------------------------------------------------------------------------------------|---------------------------------------------------------------------------------------------------------------------------------------------------------------------------------------------------------------------------------------------------------------------------------------------------------------------------------------------------------------------------------------------------------------------------------------------------------------------------------------------------------------------------------------------------------------------------------------------------------------------------------|---------------------|
| <b>Labelling and clinical description</b> | <p><b>'Copers'</b><br/>Very few work and social participation limitations, low degree of physical workload</p> <p><b>Less</b></p> <ul style="list-style-type: none"> <li>• With sick leave</li> <li>• Believe work is too heavy</li> <li>• Believe work makes pain worse</li> <li>• Believe work aggravated pain</li> <li>• Believe pain caused by work</li> <li>• With light-heavy physical workload</li> </ul> | <p>Very few social participation limitations, unsure if work aggravated/makes pain worse whichever degree of physical workload</p> <p><b>Less</b></p> <ul style="list-style-type: none"> <li>• With sick leave</li> </ul> | <p><b>'Too heavy work makes pain worse'</b></p> <p>Very few social participation limitations, work is too heavy, work aggravated/makes pain worse, pain caused by or at work, high degree of physical workload</p> <p><b>More</b></p> <ul style="list-style-type: none"> <li>• Believe work is too heavy</li> <li>• Believe work makes pain worse</li> <li>• Believe work aggravated pain</li> <li>• With light-heavy physical workload</li> </ul> | <p><b>'Social participation limitations'</b></p> <p>High degree of social participation limitations, but low degree of work limitations whichever degree of physical workload</p> <p><b>More</b></p> <ul style="list-style-type: none"> <li>• With sick leave 2-5 days</li> <li>• With decreased sexual activity</li> <li>• Stay home most of the time</li> </ul> | <p><b>'Sitting at work makes pain worse'</b></p> <p>Moderate degree of social participation limitations, work aggravated/makes pain worse, very low degree of physical workload</p> <p><b>More</b></p> <ul style="list-style-type: none"> <li>• Sit at work</li> <li>• Believe work aggravated pain</li> </ul> <p><b>Less</b></p> <ul style="list-style-type: none"> <li>• Believe work is too heavy</li> </ul> | <p><b>'Pain caused by work'</b></p> <p>Low degree of social participation limitations, pain caused by work, none with very low degree of physical workload</p> <p><b>Less</b></p> <ul style="list-style-type: none"> <li>• Believe work is too heavy</li> <li>• Believe work makes pain worse</li> <li>• Believe pain caused by work</li> <li>• Only sit at work</li> </ul> | <p><b>'Severe participation limitations'</b></p> <p>High degree of social participation limitations, work is too heavy, work aggravated/makes pain worse, pain caused by or at work, high degree of physical workload</p> <p><b>More</b></p> <ul style="list-style-type: none"> <li>• With sick leave 2-5 days or 6-31 days</li> <li>• With decreased sexual activity</li> <li>• Stay home most of the time</li> <li>• Believe work is too heavy</li> <li>• Believe work makes pain worse</li> <li>• Believe work aggravated pain</li> <li>• Believe pain caused by work</li> <li>• With low-high physical work load</li> </ul> |                     |
|                                           | <b>Category size, N</b>                                                                                                                                                                                                                                                                                                                                                                                          | 348 (38%)                                                                                                                                                                                                                 | 154 (17%)                                                                                                                                                                                                                                                                                                                                                                                                                                          | 128 (14%)                                                                                                                                                                                                                                                                                                                                                         | 93 (10%)                                                                                                                                                                                                                                                                                                                                                                                                        | 77 (8%)                                                                                                                                                                                                                                                                                                                                                                     | 70 (8%)                                                                                                                                                                                                                                                                                                                                                                                                                                                                                                                                                                                                                         | 58 (6%)             |
|                                           | <b>Posterior probability, median</b>                                                                                                                                                                                                                                                                                                                                                                             | 0.94<br>(IQR=83-95)                                                                                                                                                                                                       | 0.67<br>(IQR=54-85)                                                                                                                                                                                                                                                                                                                                                                                                                                | 0.87<br>(IQR=70-96)                                                                                                                                                                                                                                                                                                                                               | 0.83<br>(IQR=68-95)                                                                                                                                                                                                                                                                                                                                                                                             | 0.79<br>(IQR=62-88)                                                                                                                                                                                                                                                                                                                                                         | 0.84<br>(IQR=72-91)                                                                                                                                                                                                                                                                                                                                                                                                                                                                                                                                                                                                             | 0.91<br>(IQR=68-99) |
|                                           | <b>Posterior probability less than 0.70, N</b>                                                                                                                                                                                                                                                                                                                                                                   | 58<br>(17%)                                                                                                                                                                                                               | 85<br>(55%)                                                                                                                                                                                                                                                                                                                                                                                                                                        | 32<br>(25%)                                                                                                                                                                                                                                                                                                                                                       | 27<br>(29%)                                                                                                                                                                                                                                                                                                                                                                                                     | 25<br>(32%)                                                                                                                                                                                                                                                                                                                                                                 | 17<br>(24%)                                                                                                                                                                                                                                                                                                                                                                                                                                                                                                                                                                                                                     | 15<br>(26%)         |

IQR = interquartile range; FABQ-work = Fear-Avoidance Beliefs Questionnaire, work subscale

Symbols and light lines: Variables which have similar scoring pattern across categories representing an overall feature:

\*Social participation limitations



Figure 5. Profile plot of the domain-specific patient categories identified in the participation domain by the first stage of the two-stage LCA

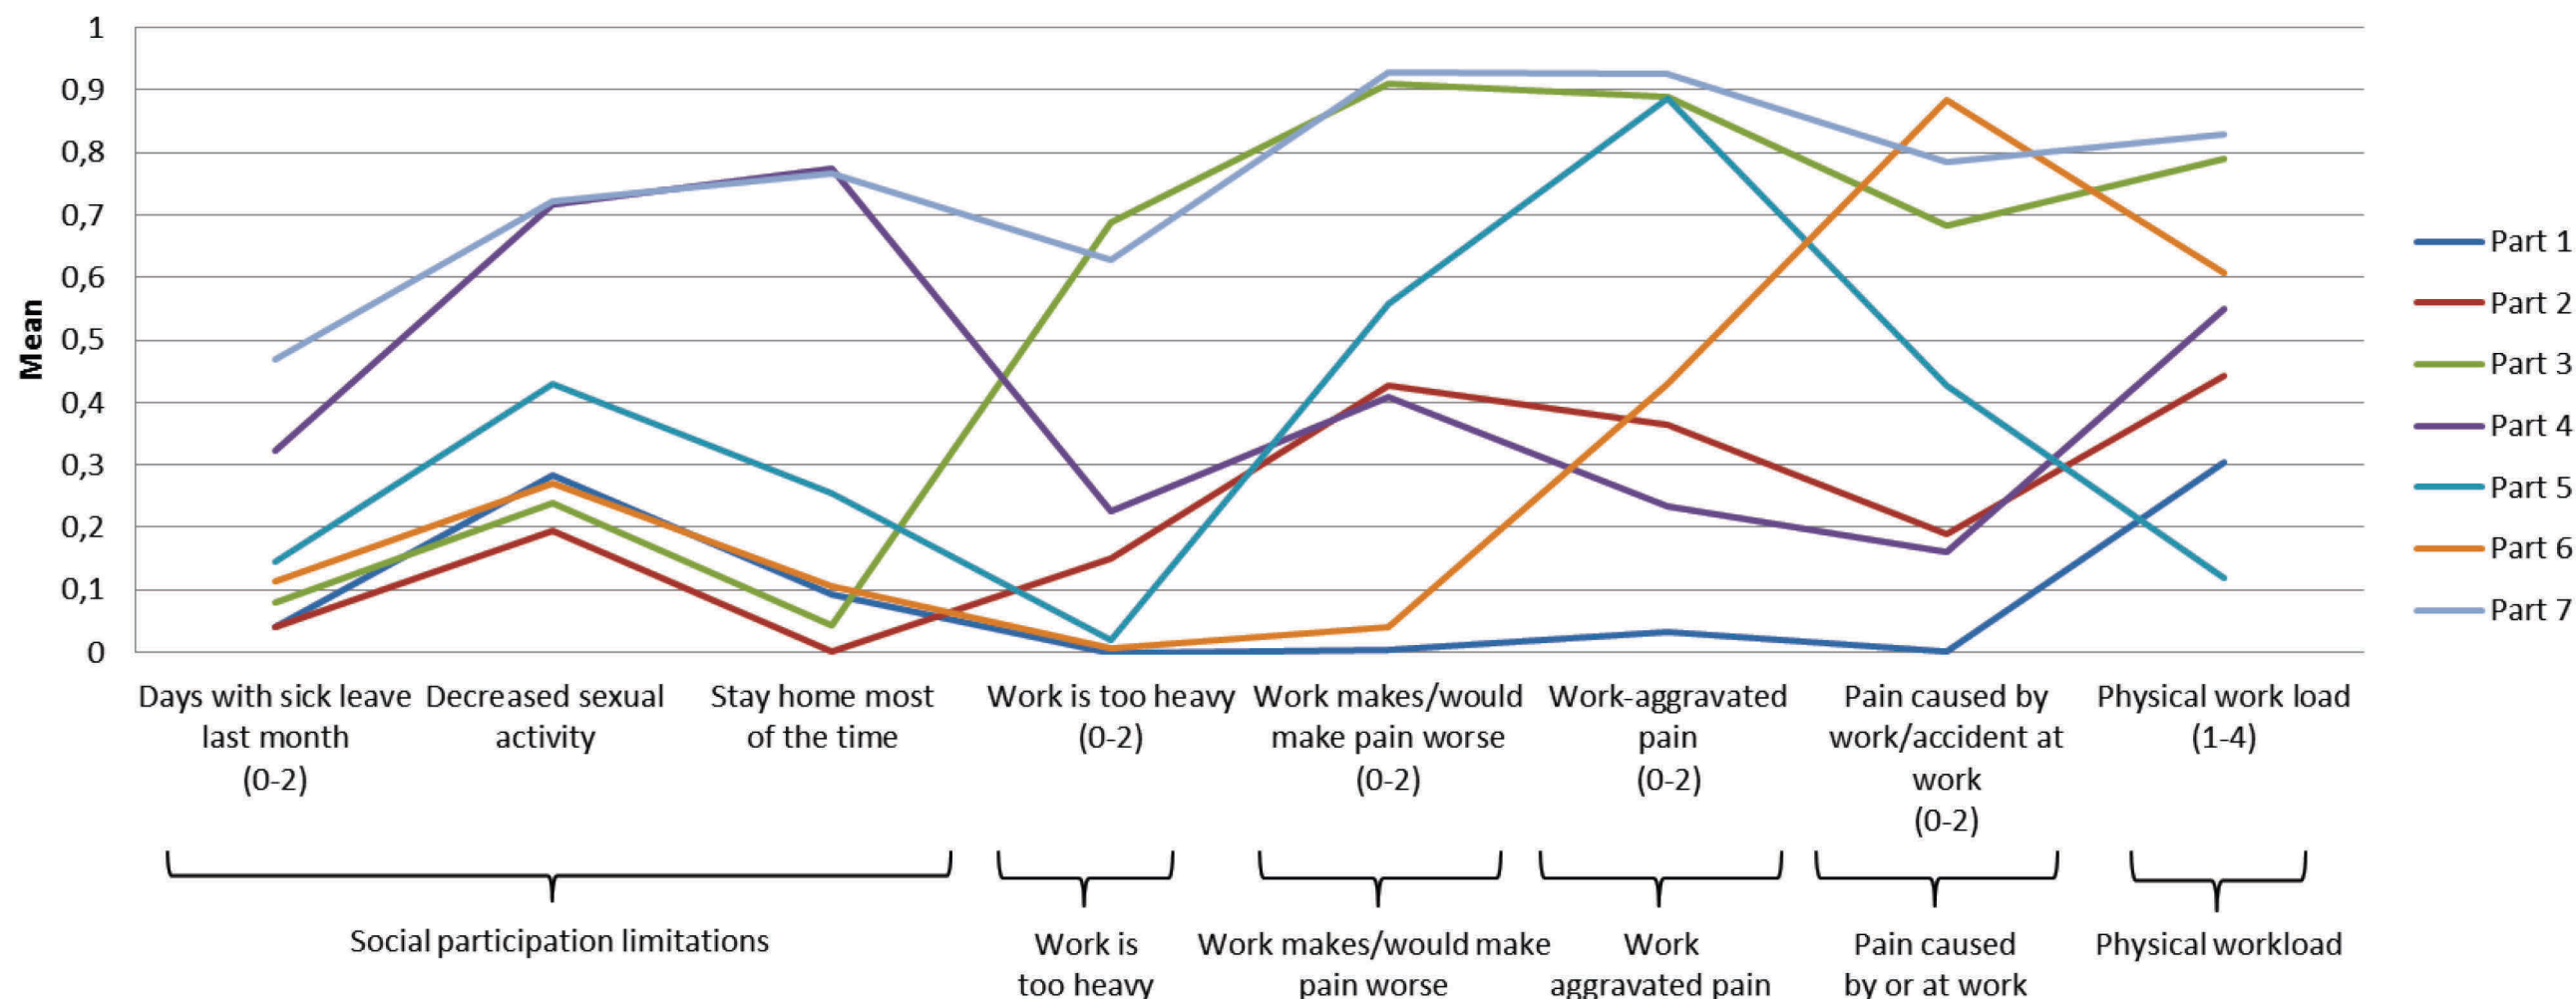

**Brief conceptual description of domain-specific patient categories identified in the participation domain (first stage of two-stage LCA):**

Part 1: Very low work and social participation limitations, low degree of physical workload

Part 2: Very low social participation limitations, unsure if work makes/would make worse or aggravated pain, whichever degree of physical workload

Part 3: Very low social participation limitations, work is too heavy, work aggravated/makes pain worse, pain caused by or at work, high degree of physical workload

Part 4: High degree of social participation limitations, but low degree of work limitations whichever degree of physical workload

Part 5: Moderate degree of social participation limitation, work aggravated/makes pain worse, very low degree of physical workload

Part 6: Low degree of social participation limitations, pain caused by work, none with very low degree of physical workload

Part 7: High degree of social participation limitations, work is too heavy work, work aggravated/makes pain worse, pain caused by or at work, high degree of physical workload

**Table 7. Descriptive presentation of the domain-specific patient categories identified in the physical impairment domain by the first stage of the two-stage LCA**

| Category<br>Feature                          | Phy. imp. 1                                                                                                                                          | Phy. imp. 2                                                                                                                                                  | Phy. imp. 3                                                                                                                                        | Phy. imp. 4                                                                                                                                        | Phy. imp. 5                                                                                                                                                         | Phy. imp. 6                                                                                                                                                                      | Scale                                                                                                                                                                                                                       |
|----------------------------------------------|------------------------------------------------------------------------------------------------------------------------------------------------------|--------------------------------------------------------------------------------------------------------------------------------------------------------------|----------------------------------------------------------------------------------------------------------------------------------------------------|----------------------------------------------------------------------------------------------------------------------------------------------------|---------------------------------------------------------------------------------------------------------------------------------------------------------------------|----------------------------------------------------------------------------------------------------------------------------------------------------------------------------------|-----------------------------------------------------------------------------------------------------------------------------------------------------------------------------------------------------------------------------|
| <b>Pain on flexion (ROM)</b>                 | <b>Half with no pain (48%)</b><br><b>Half with back pain (50%)</b><br>Very few with leg pain w/wo back pain (2%)                                     | <b>Half with no pain (40%)</b><br><b>Half with back pain (58%)</b><br>Very few with leg pain w/wo back pain (1%)                                             | Few with no pain (30%)<br><b>Many with back pain (65%)</b><br>Very few with leg pain w/wo back pain (5%)                                           | Few with no pain (25%)<br><b>Many with back pain (70%)</b><br>Very few with leg pain w/wo back pain (5%)                                           | Very few with no pain (8%)<br><b>Most with back pain (92%)</b><br>None with leg pain w/wo back pain (0%)                                                            | Very few with no pain (14%)<br>Few with back pain (21%)<br><b>Many with leg pain w/wo back pain (65%)</b>                                                                        | <b>Multistate nominal</b><br>0=no pain<br>1=back pain<br>2=leg pain w/wo back pain                                                                                                                                          |
| <b>Pain on extension (ROM)</b>               | <b>Half with no pain (46%)</b><br><b>Half with back pain (54%)</b><br>None with leg pain w/wo back pain (0%)                                         | Few with no pain (28%)<br><b>Many with back pain (70%)</b><br>Very few with leg pain w/wo back pain (2%)                                                     | <b>Half with no pain (42%)</b><br><b>Half with back pain (58%)</b><br>None with leg pain w/wo back pain (0%)                                       | <b>Half with no pain (42%)</b><br><b>Half with back pain (58%)</b><br>None with leg pain w/wo back pain (0%)                                       | Very few with no pain (2%)<br><b>Most with back pain (96%)</b><br>Very few with leg pain w/wo back pain (2%)                                                        | Few with no pain (33%)<br>Few with back pain (27%)<br><b>Half with leg pain w/wo back pain (40%)</b>                                                                             | <b>Multistate nominal</b><br>0=no pain<br>1=back pain<br>2=leg pain w/wo back pain                                                                                                                                          |
| <b>Pain on right side glide (ROM)</b>        | <b>Many with no pain (70%)</b><br>Few with back pain (30%)<br>None with leg pain w/wo back pain (0%)                                                 | <b>Half with no pain (50%)</b><br><b>Half with back pain (48%)</b><br>Very few with leg pain w/wo back pain (1%)                                             | <b>Many with no pain (60%)</b><br><b>Few with back pain (39%)</b><br>Very few with leg pain w/wo back pain (1%)                                    | <b>Half with no pain (55%)</b><br><b>Half with back pain (45%)</b><br>None with leg pain w/wo back pain (0%)                                       | Very few with no pain (10%)<br><b>Most with back pain (90%)</b><br>None with leg pain w/wo back pain (0%)                                                           | <b>Half with no pain (52%)</b><br>Very few with back pain (17%)<br><b>Few with leg pain w/wo back pain (32%)</b>                                                                 | <b>Multistate nominal</b><br>0=no pain<br>1=back pain<br>2=leg pain w/wo back pain                                                                                                                                          |
| <b>Pain on left side glide (ROM)</b>         | <b>Many with no pain (73%)</b><br>Few with back pain (27%)<br>None with leg pain w/wo back pain (0%)                                                 | <b>Half with no pain (43%)</b><br><b>Half with back pain (57%)</b><br>None with leg pain w/wo back pain (0%)                                                 | <b>Many with no pain (70%)</b><br>Few with back pain (30%)<br>None with leg pain w/wo back pain (0%)                                               | <b>Many with no pain (60%)</b><br><b>Few with back pain (39%)</b><br>Very few with leg pain w/wo back pain (1%)                                    | Very few with no pain (10%)<br><b>Most with back pain (88%)</b><br>Very few with leg pain w/wo back pain (2%)                                                       | Few with no pain (36%)<br>Few with back pain (22%)<br><b>Half with leg pain w/wo back pain (42%)</b>                                                                             | <b>Multistate nominal</b><br>0=no pain<br>1=back pain<br>2=leg pain w/wo back pain                                                                                                                                          |
| <b>Pain on right rotation (ROM)</b>          | <b>Most with no pain (90%)</b><br>Very few with back pain (9%)<br>Very few with leg pain w/wo back pain (1%)                                         | <b>Many with no pain (73%)</b><br>Few with back pain (27%)<br>None with leg pain w/wo back pain (0%)                                                         | <b>Most with no pain (80%)</b><br>Few with back pain (20%)<br>None with leg pain w/wo back pain (0%)                                               | <b>Most with no pain (94%)</b><br>Very few with back pain (6%)<br>None with leg pain w/wo back pain (0%)                                           | Very few with no pain (1%)<br><b>Most with back pain (99%)</b><br>None with leg pain w/wo back pain (0%)                                                            | <b>Many with no pain (69%)</b><br>Very few with back pain (15%)<br>Very few with leg pain w/wo back pain (15%)                                                                   | <b>Multistate nominal</b><br>0=no pain<br>1=back pain<br>2=leg pain w/wo back pain                                                                                                                                          |
| <b>Pain on left rotation (ROM )</b>          | <b>Most with no pain (93%)</b><br>Very few with back pain (7%)<br>None with leg pain w/wo back pain (0%)                                             | <b>Many with no pain (74%)</b><br>Few with back pain (26%)<br>None with leg pain w/wo back pain (0%)                                                         | <b>Most with no pain (80%)</b><br>Few with back pain (20%)<br>None with leg pain w/wo back pain (0%)                                               | <b>Most with no pain (81%)</b><br>Very few with back pain (19%)<br>None with leg pain w/wo back pain (0%)                                          | Very few with no pain (3%)<br><b>Most with back pain (97%)</b><br>None with leg pain w/wo back pain (0%)                                                            | <b>Many with no pain (60%)</b><br>Very few with back pain (17%)<br><b>Few with leg pain w/wo back pain (22%)</b>                                                                 | <b>Multistate nominal</b><br>0=no pain<br>1=back pain<br>2=leg pain w/wo back pain                                                                                                                                          |
| <b>Diagnosis based on 'McKenzie testing'</b> | None with reducible disc (0%)<br>None with partly reducible disc (0%)<br>Very few with non-reducible disc (10%)<br><b>Few with dysfunction (25%)</b> | <b>Few with reducible disc (26%)</b><br>Very few with partly reducible disc (15%)<br>Very few with non-reducible disc (4%)<br>Very few with dysfunction (4%) | <b>All with reducible disc (100%)</b><br>None with partly reducible disc (0%)<br>None with non-reducible disc (0%)<br>None with dysfunction (0%)   | None with reducible disc (0%)<br><b>All with partly reducible disc (100%)</b><br>None with non-reducible disc (0%)<br>None with dysfunction (0%)   | Very few with reducible disc (9%)<br><b>Few with partly reducible disc (29%)</b><br>Very few with non-reducible disc (2%)<br><b>Very few with dysfunction (16%)</b> | <b>Very few with reducible disc (16%)</b><br><b>Few with partly reducible disc (30%)</b><br><b>Few with non-reducible disc (25%)</b><br>None with dysfunction (0%)               | <b>Dichotomous (4 items)</b><br>0=no<br>1=yes<br>Reducible disc<br>Partly reducible disc<br>Non-reducible disc<br>Dysfunction                                                                                               |
| <b>Positive neurological examination</b>     | Very few with indication of herniated disc (1% right, 1% left)<br>Very few with affected muscular strength (1%), sensibility (2%) or reflexes (2%)   | Very few with indication of herniated disc (4% right, 2% left)<br>Very few with affected muscular strength (1%), sensibility (7%) or reflexes (7%)           | Very few with indication of herniated disc (7% right, 7% left)<br>Very few with affected muscular strength (2%), sensibility (6%) or reflexes (5%) | Very few with indication of herniated disc (0% right, 2% left)<br>Very few with affected muscular strength (2%), sensibility (1%) or reflexes (5%) | Very few with indication of herniated disc (7% right, 5% left)<br>Very few with affected muscular strength (4%), sensibility (3%) or reflexes (6%)                  | <b>Few (36% right) half (42% left) with indication of herniated disc</b><br><b>Few with affected muscular strength (26%) and sensibility (27%), and half with reflexes (42%)</b> | <b>Dichotomous (5 items)</b><br>0=no<br>1=yes<br>Indication of herniated disc, right side<br>Indication of herniated disc, left side<br>Affected muscular strength<br>Affected sensibility<br>Affected deep tendon reflexes |
| <b>Positive sacroiliac joint tests</b>       | Very few with positive tests: Separation (2%)<br>Thigh thrust (10%)<br>Gaenslen's (7%)                                                               | <b>Many with positive tests: Separation (42%)</b><br><b>Thigh thrust (77%)</b><br><b>Gaenslen's (70%)</b>                                                    | Very few with positive tests: Separation (0%)<br>Thigh thrust (5%)<br>Gaenslen's (9%)                                                              | Very few with positive tests: Separation (5%)<br>Thigh thrust (10%)<br>Gaenslen's (6%)                                                             | Few with positive tests: Separation (6%)<br>Thigh thrust (26%)<br>Gaenslen's (16%)                                                                                  | Few with positive tests: Separation (10%)<br>Thigh thrust (27%)<br>Gaenslen's (20%)                                                                                              | <b>Dichotomous (5 items)</b><br>0=negative<br>1=positive                                                                                                                                                                    |

|                                                |                                                                                                                                                                                                        |                                                                                                                                                                                                                                                                                             |                                                                                                                                                                 |                                                                                                                                                                                                                    |                                                                                                                                                           |                                                                                                                                                                                                                                                                                  |                                                                                                            |
|------------------------------------------------|--------------------------------------------------------------------------------------------------------------------------------------------------------------------------------------------------------|---------------------------------------------------------------------------------------------------------------------------------------------------------------------------------------------------------------------------------------------------------------------------------------------|-----------------------------------------------------------------------------------------------------------------------------------------------------------------|--------------------------------------------------------------------------------------------------------------------------------------------------------------------------------------------------------------------|-----------------------------------------------------------------------------------------------------------------------------------------------------------|----------------------------------------------------------------------------------------------------------------------------------------------------------------------------------------------------------------------------------------------------------------------------------|------------------------------------------------------------------------------------------------------------|
|                                                | Compression (2%)<br>Sacral thrust (20%)                                                                                                                                                                | <b>Compression (63%)<br/>Sacral thrust (83%)</b>                                                                                                                                                                                                                                            | Compression (4%)<br>Sacral thrust (14%)                                                                                                                         | Compression (3%)<br>Sacral thrust (17%)                                                                                                                                                                            | Compression (9%)<br>Sacral thrust (36%)                                                                                                                   | Compression (18%)<br>Sacral thrust (29%)                                                                                                                                                                                                                                         | Separation test<br>Thigh thrust<br>Gaenslen's test,<br>Compression test,<br>Sacral thrust                  |
| <b>Pain on combined extension/rotation</b>     | Half with pain on extension/rotation (44%)                                                                                                                                                             | Half with pain on extension/rotation (43%)                                                                                                                                                                                                                                                  | Half with pain on extension/rotation (57%)                                                                                                                      | <b>Many with pain on extension/rotation (63%)</b>                                                                                                                                                                  | Very few with pain on extension/rotation (13%)                                                                                                            | Half with pain on extension/rotation (58%)                                                                                                                                                                                                                                       | <b>Dichotomous</b><br>0=no<br>1=yes                                                                        |
| <b>Trigger points</b>                          | Few with replication of pain by trigger point (25%)                                                                                                                                                    | <b>Half with replication of pain by trigger point (52%)</b>                                                                                                                                                                                                                                 | Very few with replication of pain by trigger point (18%)                                                                                                        | Very few with replication of pain by trigger point (9%)                                                                                                                                                            | Very few with replication of pain by trigger point (11%)                                                                                                  | Few with replication of pain by trigger point (38%)                                                                                                                                                                                                                              | <b>Dichotomous</b><br>0=no<br>1=yes                                                                        |
| <b>Pain on muscle palpation</b>                | Half with replication of pain on muscle palpation (56%)                                                                                                                                                | <b>Most with replication of pain on muscle palpation (80%)</b>                                                                                                                                                                                                                              | Half with replication of pain on muscle palpation (55%)                                                                                                         | Few with replication of pain on muscle palpation (36%)                                                                                                                                                             | Half with replication of pain on muscle palpation (44%)                                                                                                   | <b>Many with replication of pain on muscle palpation (77%)</b>                                                                                                                                                                                                                   | <b>Dichotomous</b><br>0=no<br>1=yes                                                                        |
| <b>Painful muscle groups</b>                   | <b>Half with painful back muscles (46%)</b><br>Few with painful buttock and leg muscles (27%)<br>Few with both painful back and buttock/leg muscles (28%)                                              | Very few with painful back muscles (18%)<br><b>Half with painful buttock and leg muscles (55%)</b><br>Few with both painful back and buttock/leg muscles (27%)                                                                                                                              | Few with painful back muscles (37%)<br>Few with painful buttock and leg muscles (39%)<br>Few with both painful back and buttock/leg muscles (24%)               | Few with painful back muscles (37%)<br>Few with painful buttock and leg muscles (31%)<br>Few with both painful back and buttock/leg muscles (31%)                                                                  | <b>Half with painful back muscles (50%)</b><br>Few with painful buttock and leg muscles (27%)<br>Few with both painful back and buttock/leg muscles (23%) | Few with painful back muscles (25%)<br><b>Half with painful buttock and leg muscles (53%)</b><br>Few with both painful back and buttock/leg muscles (22%)                                                                                                                        | <b>Multistate nominal</b><br>0=back muscles<br>1=buttock and leg muscles<br>2=back and buttock/leg muscles |
| <b>Acute lateral shift</b>                     | Very few with acute lateral shift (4%)                                                                                                                                                                 | Very few with acute lateral shift (8%)                                                                                                                                                                                                                                                      | Very few with acute lateral shift (13%)                                                                                                                         | Very few with acute lateral shift (16%)                                                                                                                                                                            | Very few with acute lateral shift (16%)                                                                                                                   | Very few with acute lateral shift (12%)                                                                                                                                                                                                                                          | <b>Dichotomous</b><br>0=no<br>1=yes                                                                        |
| <b>Acute flexion deformity</b>                 | Very few with acute flexion deformity (5%)                                                                                                                                                             | Very few with acute flexion deformity (2%)                                                                                                                                                                                                                                                  | Very few with acute flexion deformity (3%)                                                                                                                      | Very few with acute flexion deformity (7%)                                                                                                                                                                         | Very few with acute flexion deformity (7%)                                                                                                                | Very few with acute flexion deformity (7%)                                                                                                                                                                                                                                       | <b>Dichotomous</b><br>0=no<br>1=yes                                                                        |
| <b>Labelling and clinical description</b>      | <b>Mainly back pain on flexion and extension, no leg pain</b><br><br><b>More</b><br>• with no pain in most directions<br>• with the diagnosis: dysfunction<br>• with painful back muscles on palpation | <b>Mainly back pain on flexion, extension and side glide, no leg pain, but SI joint pain, trigger points and painful buttock/leg muscles</b><br><br><b>More</b><br>• with the diagnosis: Reducible disc<br>• with positive SI joint tests<br>• with painful muscle palpation/trigger points | <b>Diagnosis: reducible disc; mainly back pain on flexion, extension and side glide, no leg pain</b><br><br><b>More</b><br>• with the diagnosis: Reducible disc | <b>Diagnosis: partly reducible disc, mainly back pain on flexion, extension and side glide, no leg pain</b><br><br><b>More</b><br>• with the diagnosis: Partly reducible disc<br>• with pain on extension/rotation | <b>Back pain on AROM in all directions, painful back muscles</b><br><br><b>More</b><br>• with painful back muscles                                        | <b>Mainly leg pain on flexion, extension and side glide, neurological signs, trigger points and painful buttock/leg muscles</b><br><br><b>More</b><br>• with leg pain on ROM<br>• with a 'disc-diagnosis'<br>• with neurological signs<br>• with painful buttock and leg muscles |                                                                                                            |
| <b>Category size, N</b>                        | 264 (28%)                                                                                                                                                                                              | 180 (19%)                                                                                                                                                                                                                                                                                   | 147 (16%)                                                                                                                                                       | 138 (15%)                                                                                                                                                                                                          | 126 (14%)                                                                                                                                                 | 73 (8%)                                                                                                                                                                                                                                                                          |                                                                                                            |
| <b>Posterior probability, median (IQR)</b>     | 0.97<br>(0.88-0.99)                                                                                                                                                                                    | 0.99<br>(0.89-1.00)                                                                                                                                                                                                                                                                         | 0.99<br>(0.91-1.00)                                                                                                                                             | 0.99<br>(0.95-1.00)                                                                                                                                                                                                | 0.88<br>(0.73-0.99)                                                                                                                                       | 1.00<br>(0.99-1.00)                                                                                                                                                                                                                                                              |                                                                                                            |
| <b>Posterior probability less than 0.70, N</b> | 28<br>(11%)                                                                                                                                                                                            | 22<br>(12%)                                                                                                                                                                                                                                                                                 | 14<br>(10%)                                                                                                                                                     | 5<br>(4%)                                                                                                                                                                                                          | 27<br>(2%)                                                                                                                                                | 6<br>(8%)                                                                                                                                                                                                                                                                        |                                                                                                            |

**Bold** text indicates characteristic features which mainly identify the respective domain-specific patient categories

Symbols and light lines: Variables which have similar scoring pattern across categories representing an overall feature:

Phy.imp. = physical impairment, IQR=inter quartile range, ROM = range of motion, w/wo = with or without



Figure 6. Profile plot of the domain-specific patient categories identified in the physical impairment domain by the first stage of the two-stage LCA

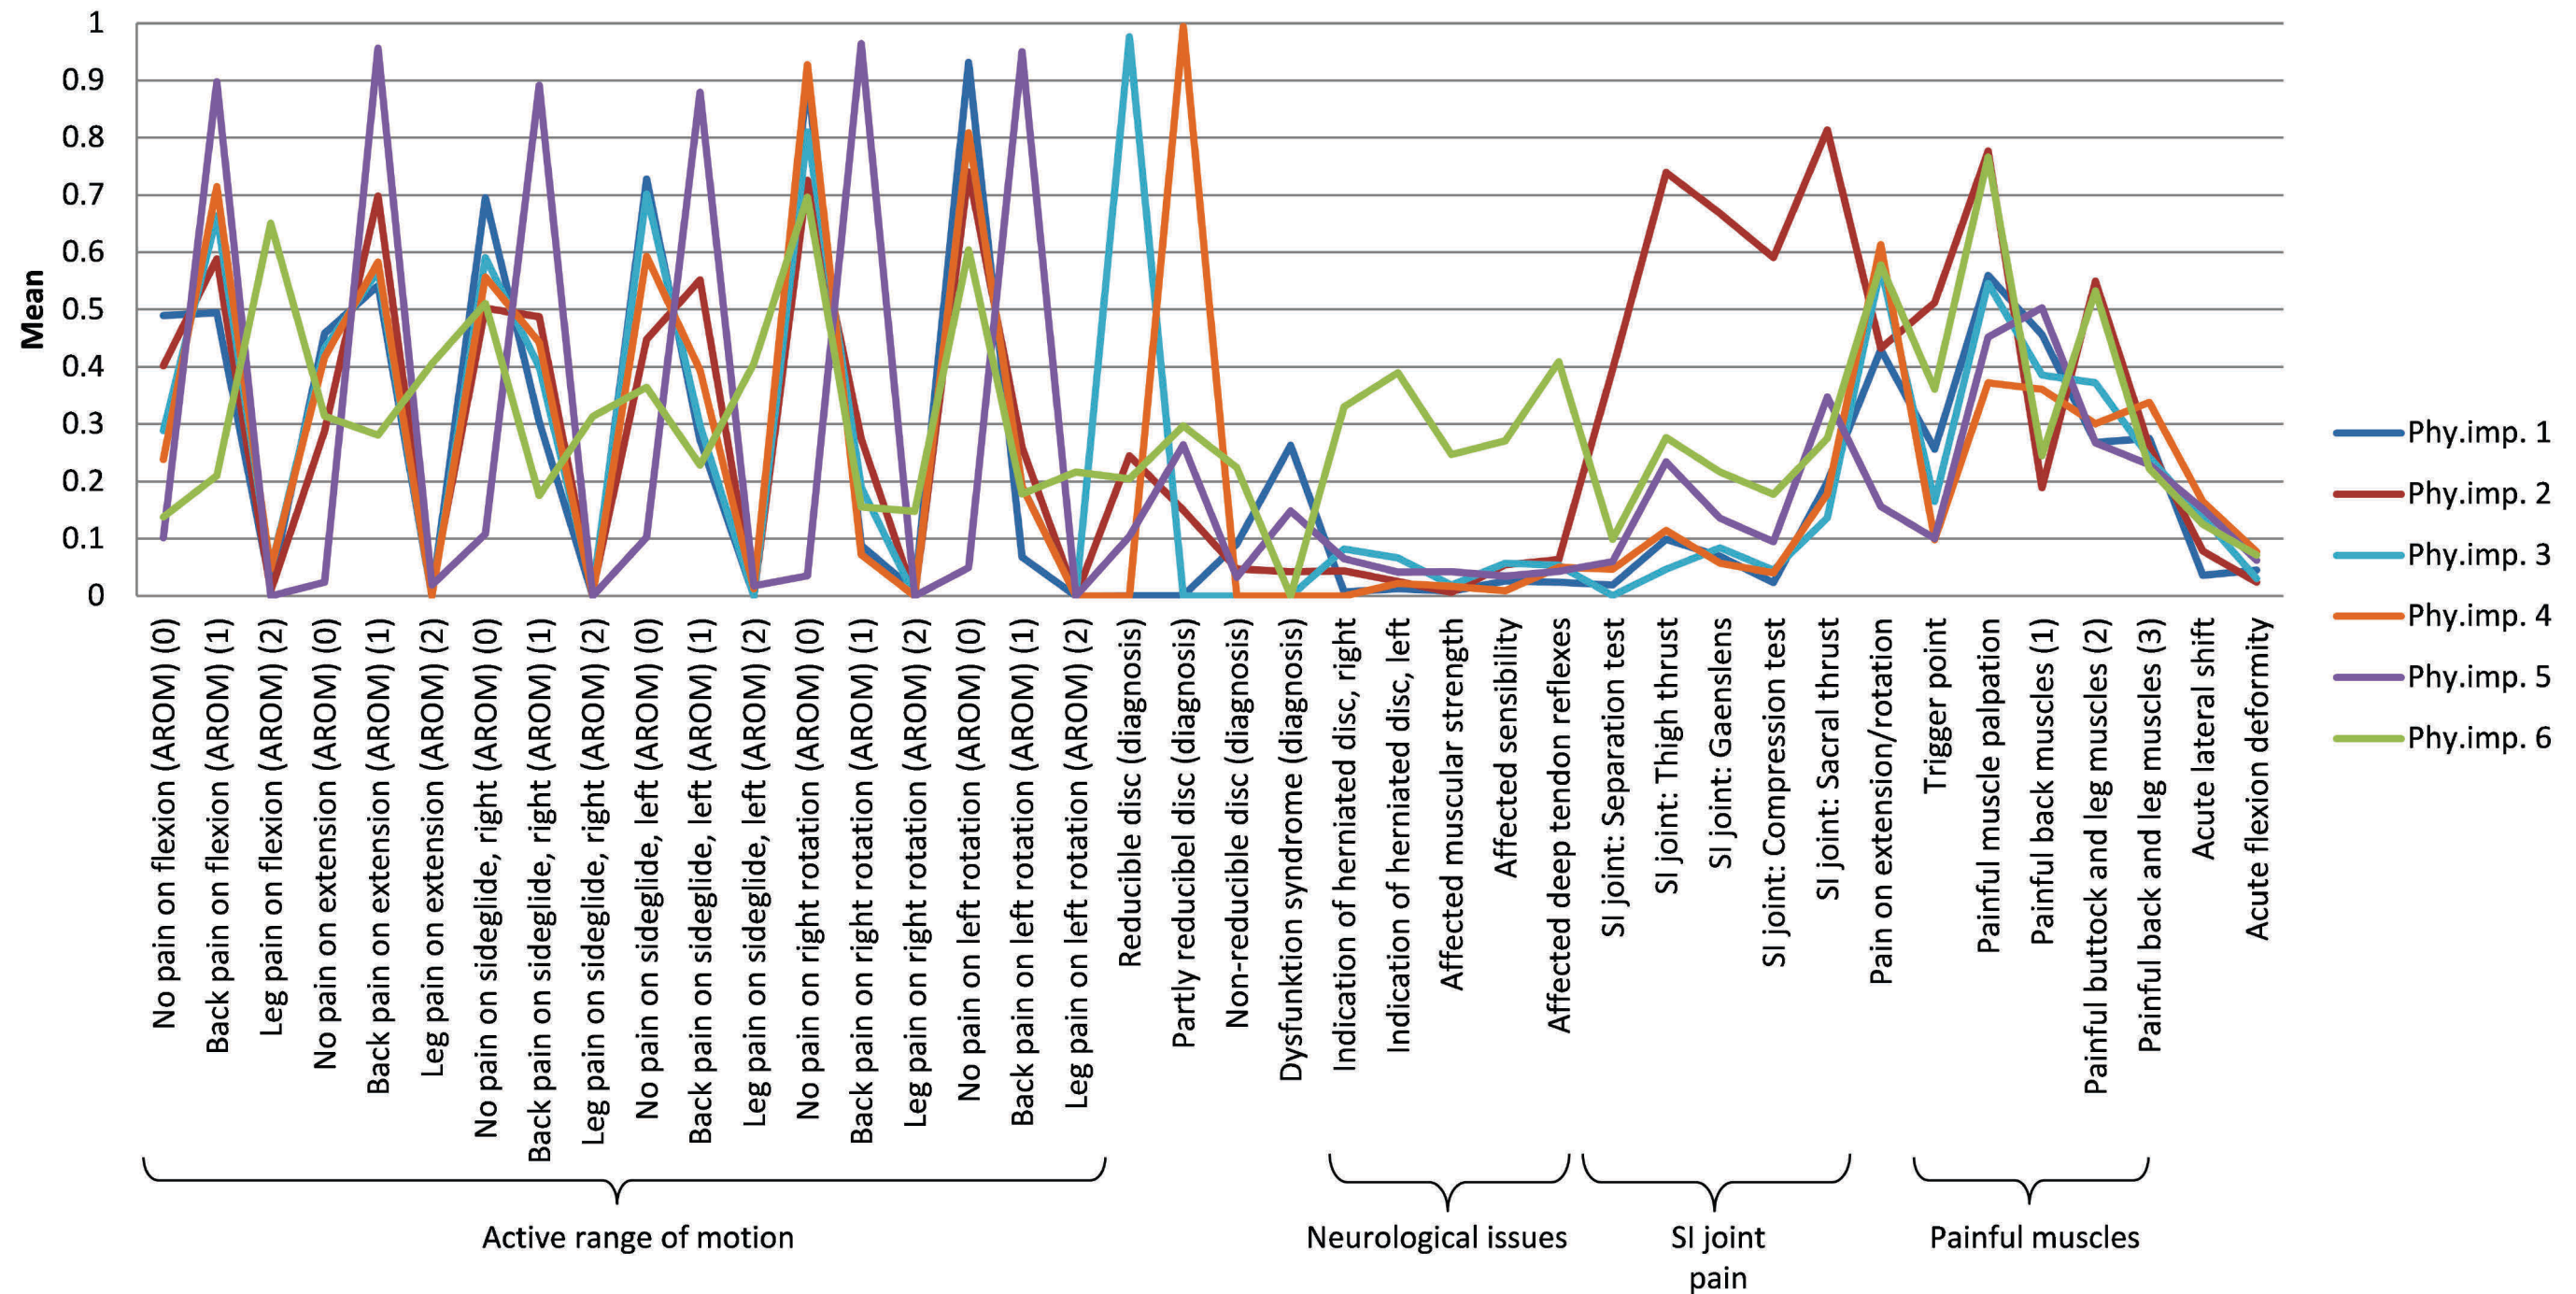

**Brief conceptual description of domain-specific patient categories identified in the physical impairment domain (first stage of two-stage LCA):**

Phy. imp. 1: Mainly back pain on flexion and extension, no leg pain

Phy. imp. 2: Mainly back pain on flexion, extension and side glide, no leg pain, *SI joint pain*, trigger points and painful buttock/leg muscles

Phy. imp. 3: Mainly back pain on flexion, extension and side glide, no leg pain, *diagnosis: reducible disc*

Phy. imp. 4: Mainly back pain on flexion, extension and side glide, no leg pain, *diagnosis: partly reducible disc*

Phy. imp. 5: Back pain on AROM in all directions, painful back muscles

Phy. imp. 6: Mainly leg pain on flexion, extension and side glide, neurological signs, trigger points and painful buttock/leg muscles



**Table 8: Descriptive presentation of the domain-specific patient categories identified in the psychology domain by the first stage of the two-stage LCA**

| Category<br>Variable                                            | Psych 1                                                                                   | Psych 2                                                                                           | Psych 3                                                                                             | Psych 4                                                                                               | Psych 5                                                                                   | Psych 6                                                                                             | Psych 7                                                                                   | Psych 8                                                                                           | Scale                                                                                 |
|-----------------------------------------------------------------|-------------------------------------------------------------------------------------------|---------------------------------------------------------------------------------------------------|-----------------------------------------------------------------------------------------------------|-------------------------------------------------------------------------------------------------------|-------------------------------------------------------------------------------------------|-----------------------------------------------------------------------------------------------------|-------------------------------------------------------------------------------------------|---------------------------------------------------------------------------------------------------|---------------------------------------------------------------------------------------|
| <b>Treatment not essential</b>                                  | <b>Very few believe treatment is not essential to reduce pain (IQR=0-0)</b>               | Half believe treatment is not essential to reduce pain (IQR=2-8)                                  | Half believe treatment is not essential to reduce pain (IQR=2-5)                                    | Half believe treatment is not essential to reduce pain (IQR=2-8)                                      | <b>Very few believe treatment is not essential to reduce pain (IQR=0-0)</b>               | Half believe treatment is not essential to reduce pain (IQR=2-7)                                    | Few believe treatment is not essential to reduce pain (IQR=1-6)                           | <b>Many believe treatment is not essential to reduce pain (IQR=3-10)</b>                          | <b>Continuous</b><br>0=completely disagree<br>10=completely agree                     |
| <b>Sleep less well (RMDQ-15)*</b>                               | Many sleep less well (61%)                                                                | Many sleep less well (72%)                                                                        | <b>Few sleep less well (28%)</b>                                                                    | <b>None sleep less well (0%)</b>                                                                      | Many sleep less well (78%)                                                                | <b>All sleep less well (100%)</b>                                                                   | Many sleep less well (69%)                                                                | Many sleep less well (74%)                                                                        | <b>Dichotomous</b><br>0=no<br>1=yes                                                   |
| <b>Had trouble sleeping at night (MDI-9)*</b>                   | Very few had trouble sleeping (IQR=0-1)                                                   | Few had trouble sleeping (IQR=1-3)                                                                | Very few had trouble sleeping (IQR=0-1)                                                             | Very few had trouble sleeping (IQR=0-0)                                                               | <b>Half had trouble sleeping (IQR=1-4)</b>                                                | <b>Half had trouble sleeping (IQR=1-3)</b>                                                          | <b>Many had trouble sleeping (IQR=2-4)</b>                                                | Few had trouble sleeping (IQR=0-2)                                                                | <b>Ordinal</b><br>0=at no time<br>5=all the time                                      |
| <b>Able to decrease pain**</b>                                  | Moderately able to decrease pain (IQR=2-7)                                                | Moderately able to decrease pain (IQR=3-6)                                                        | Highly able to decrease pain (IQR=1-4)                                                              | Highly able to decrease pain (IQR=2-5)                                                                | Moderately able to decrease pain (IQR=2-7)                                                | Highly able to decrease pain (IQR=2-5)                                                              | Moderately able to decrease pain (IQR=3-6)                                                | <b>Moderately able to decrease pain (IQR=3.5-7)</b>                                               | <b>Continuous</b><br>0=Completely<br>10=Not at all                                    |
| <b>Work might harm back (FABQ-11)**</b>                         | Few believe work will harm<br><br>Disagree=56%<br>Unsure=17%<br>Agree=28%                 | <b>Half believe work will harm</b><br><br>Disagree=24%<br>Unsure=21%<br>Agree=55%                 | <b>Very few believe work will harm</b><br><br>Disagree=87%<br>Unsure=8%<br>Agree=5%                 | Few believe work will harm<br><br>Disagree=54%<br>Unsure=19%<br>Agree=27%                             | Few believe work will harm<br><br>Disagree=35%<br>Unsure=28%<br>Agree=37%                 | <b>Very few believe work will harm</b><br><br>Disagree=72%<br>Unsure=9%<br>Agree=18%                | <b>Half believe work will harm</b><br><br>Disagree=24%<br>Unsure=28%<br>Agree=48%         | Few believe work will harm<br><br>Disagree=34%<br>Unsure=30%<br>Agree=36%                         | <b>Ordinal<sup>†</sup></b><br>0=completely disagree<br>3=unsure<br>6=completely agree |
| <b>Should not do normal work with present pain (FABQ-12)**</b>  | Few believe they should not do normal work<br><br>Disagree=52%<br>Unsure=21%<br>Agree=27% | <b>Half believe they should not do normal work</b><br><br>Disagree=29%<br>Unsure=18%<br>Agree=53% | <b>Very few believe they should not do normal work</b><br><br>Disagree=99%<br>Unsure=1%<br>Agree=0% | <b>Very few believe they should not do normal work</b><br><br>Disagree=73%<br>Unsure=17%<br>Agree=11% | Few believe they should not do normal work<br><br>Disagree=43%<br>Unsure=22%<br>Agree=35% | <b>Very few believe they should not do normal work</b><br><br>Disagree=90%<br>Unsure=7%<br>Agree=3% | Few believe they should not do normal work<br><br>Disagree=37%<br>Unsure=24%<br>Agree=39% | <b>Half believe they should not do normal work</b><br><br>Disagree=23%<br>Unsure=23%<br>Agree=55% | <b>Ordinal<sup>†</sup></b><br>0=completely disagree<br>3=unsure<br>6=completely agree |
| <b>Cannot work till pain is treated (FABQ-14)**</b>             | Few cannot work<br><br>Disagree=56%<br>Unsure=10%<br>Agree=34%                            | <b>Half cannot work</b><br><br>Disagree=36%<br>Unsure=20%<br>Agree=44%                            | <b>None cannot work</b><br><br>Disagree=100%<br>Unsure=0%<br>Agree=0%                               | <b>Very few cannot work</b><br><br>Disagree=83%<br>Unsure=8%<br>Agree=9%                              | Few cannot work<br><br>Disagree=60%<br>Unsure=8%<br>Agree=33%                             | <b>Very few cannot work</b><br><br>Disagree=92%<br>Unsure=3%<br>Agree=5%                            | <b>Half cannot work</b><br><br>Disagree=43%<br>Unsure=9%<br>Agree=48%                     | <b>Half cannot work</b><br><br>Disagree=36%<br>Unsure=7%<br>Agree=57%                             | <b>Ordinal<sup>†</sup></b><br>0=completely disagree<br>3=unsure<br>6=completely agree |
| <b>Feel socially isolated</b>                                   | <b>Very few feel socially isolated (7%)</b>                                               | Half feel socially isolated (53%)                                                                 | <b>Very few feel socially isolated (6%)</b>                                                         | Few feel socially isolated (37%)                                                                      | Few feel socially isolated (30%)                                                          | Few feel socially isolated (21%)                                                                    | <b>Many feel socially isolated (76%)</b>                                                  | <b>Very few feel socially isolated (2%)</b>                                                       | <b>Dichotomous</b><br>0=Not at all isolated<br>1=little to quite isolated             |
| <b>Not enjoyed things used to enjoy (SBT-8) <sup>‡</sup></b>    | Few have not enjoyed usual things (29%)                                                   | Many have not enjoyed usual things (61%)                                                          | <b>Very few have not enjoyed usual things (6%)</b>                                                  | Few have not enjoyed usual things (24%)                                                               | Many have not enjoyed usual things (62%)                                                  | Half have not enjoyed usual things (41%)                                                            | <b>Most have not enjoyed usual things (83%)</b>                                           | Half have not enjoyed usual things (44%)                                                          | Dichotomous<br>0=disagree<br>1=agree                                                  |
| <b>Negative recovery belief <sup>‡</sup></b>                    | <b>Very few with negative recovery belief (18%)</b>                                       | Few with negative recovery belief (38%)                                                           | <b>Very few with negative recovery belief (15%)</b>                                                 | Few with negative recovery belief (33%)                                                               | Few with negative recovery belief (33%)                                                   | Few with negative recovery belief (28%)                                                             | <b>Half with negative recovery belief (53%)</b>                                           | <b>Very few with negative recovery belief (15%)</b>                                               | <b>Dichotomous</b><br>0=Likely to recover<br>1=Unsure-Not at all likely               |
| <b>Worrying thoughts a lot of the time (SBT-6) <sup>‡</sup></b> | <b>Very few worried (9%)</b>                                                              | Half worried (42%)                                                                                | <b>Very few worried (2%)</b>                                                                        | <b>Very few worried (8%)</b>                                                                          | Half worried (47%)                                                                        | Few worried (24%)                                                                                   | <b>Most worried (85%)</b>                                                                 | <b>Very few worried (4%)</b>                                                                      | Dichotomous<br>0=disagree<br>1=agree                                                  |
| <b>Lost interest in daily activities (MDI-2) <sup>‡</sup></b>   | Very few have lost interest all the time, half some of the time<br><br>At no time=65%     | Few have lost interest all the time, half some of the time<br><br>At no time=17%                  | <b>None have lost interest all the time, very few some of the time</b>                              | Very few have lost interest all the time, half some of the time<br><br>At no time=35%                 | Half have lost interest all the time, half some of the time<br><br>At no time=9%          | Very few have lost interest all the time, half some of the time<br><br>At no time=50%               | <b>Most have lost interest all the time, very few some of the time</b>                    | <b>None have lost interest all the time, very few some of the time</b>                            | <b>Ordinal</b><br>0=at no time<br>1=some of the time<br>2=slightly-all the time       |

|                                                                    |                                                                                                                                                        |                                                                                                                                                         |                                                                                                                                                     |                                                                                                                                                       |                                                                                                                                              |                                                                                                                                                       |                                                                                                                                                          |                                                                                                                                                         |                                                                                 |
|--------------------------------------------------------------------|--------------------------------------------------------------------------------------------------------------------------------------------------------|---------------------------------------------------------------------------------------------------------------------------------------------------------|-----------------------------------------------------------------------------------------------------------------------------------------------------|-------------------------------------------------------------------------------------------------------------------------------------------------------|----------------------------------------------------------------------------------------------------------------------------------------------|-------------------------------------------------------------------------------------------------------------------------------------------------------|----------------------------------------------------------------------------------------------------------------------------------------------------------|---------------------------------------------------------------------------------------------------------------------------------------------------------|---------------------------------------------------------------------------------|
|                                                                    | Some of the time=31%<br>Slightly-all the time=4%                                                                                                       | Some of the time=55%<br>Slightly-all the time=28%                                                                                                       | At no time=92%<br>Some of the time=8%<br>Slightly-all the time=0%                                                                                   | Some of the time=54%<br>Slightly-all the time=11%                                                                                                     | Some of the time=44%<br>Slightly-all the time=47%                                                                                            | Some of the time=47%<br>Slightly-all the time=4%                                                                                                      | At no time=2%<br>Some of the time=9%<br>Slightly-all the time=89%                                                                                        | At no time=92%<br>Some of the time=8%<br>Slightly-all the time=0%                                                                                       |                                                                                 |
| <b>Felt very restless/subdued/slowed down (MDI-8)</b> <sup>†</sup> | Very few have felt restless all the time, half some of the time<br><br>At no time=47%<br>Some of the time=46%<br>Slightly-all the time=7%              | Half have felt restless all the time, half some of the time<br><br>At no time=4%<br>Some of the time=50%<br>Slightly-all the time=46%                   | <b>Very few have felt restless all the time, few some of the time</b><br><br>At no time=71%<br>Some of the time=28%<br>Slightly-all the time=1%     | Very few have felt restless all the time, many some of the time<br><br>At no time=25%<br>Some of the time=66%<br>Slightly-all the time=8%             | Half have felt restless all the time, few some of the time<br><br>At no time=2%<br>Some of the time=39%<br>Slightly-all the time=58%         | Very few have felt restless all the time, many some of the time<br><br>At no time=21%<br>Some of the time=62%<br>Slightly-all the time=17%            | <b>Most have felt restless all the time, very few some of the time</b><br><br>At no time=0%<br>Some of the time=5%<br>Slightly-all the time=95%          | <b>Very few have felt restless all the time, few some of the time</b><br><br>At no time=65%<br>Some of the time=33%<br>Slightly-all the time=2%         | <b>Ordinal</b><br>0=at no time<br>1=some of the time<br>2=slightly-all the time |
| <b>Had a bad conscience (MDI-5)</b> <sup>†</sup>                   | Very few had bad conscience all the time or some of the time<br><br>At no time=77%<br>Some of the time=19%<br>Slightly-all the time=4%                 | Few had bad conscience all the time or some of the time<br><br>At no time=35%<br>Some of the time=37%<br>Slightly-all the time=28%                      | <b>None had bad conscience all the time and very few some of the time</b><br><br>At no time=92%<br>Some of the time=8%<br>Slightly-all the time=0%  | Very few had bad conscience all the time and few some of the time<br><br>At no time=60%<br>Some of the time=37%<br>Slightly-all the time=3%           | Half had bad conscience all the time and few some of the time<br><br>At no time=25%<br>Some of the time=32%<br>Slightly-all the time=43%     | Very few had bad conscience all the time and half some of the time<br><br>At no time=57%<br>Some of the time=40%<br>Slightly-all the time=3%          | <b>Many had bad conscience all the time and very few some of the time</b><br><br>At no time=11%<br>Some of the time=16%<br>Slightly-all the time=73%     | <b>None had bad conscience all the time and very few some of the time</b><br><br>At no time=98%<br>Some of the time=2%<br>Slightly-all the time=0%      | <b>Ordinal</b><br>0=at no time<br>1=some of the time<br>2=slightly-all the time |
| <b>Felt low in spirits/sad (MDI-1)</b> <sup>†</sup>                | Very few had felt sad all the time and few some of the time<br><br>At no time=76%<br>Some of the time=24%<br>Slightly-all the time=1%                  | Very few had felt sad all the time, many some of the time<br><br>At no time=18%<br><b>Some of the time=73%</b><br>Slightly-all the time=9%              | <b>None had felt sad all the time and very few some of the time</b><br><br>At no time=90%<br>Some of the time=10%<br>Slightly-all the time=0%       | Very few had felt sad all the time and half some of the time<br><br>At no time=40%<br>Some of the time=60%<br>Slightly-all the time=1%                | Few had felt sad all the time and many some of the time<br><br>At no time=11%<br>Some of the time=61%<br>Slightly-all the time=27%           | Very few had felt sad all the time and half some of the time<br><br>At no time=49%<br>Some of the time=47%<br>Slightly-all the time=3%                | <b>Most had felt sad all the time and few some of the time</b><br><br>At no time=0%<br>Some of the time=16%<br>Slightly-all the time=84%                 | <b>None had felt sad all the time and very few some of the time</b><br><br>At no time=98%<br>Some of the time=2%<br>Slightly-all the time=0%            | <b>Ordinal</b><br>0=at no time<br>1=some of the time<br>2=slightly-all the time |
| <b>Felt lacking in energy and strength (MDI-3)</b> <sup>†</sup>    | Very few felt lacking in energy some of or all the time (IQR=0-1)                                                                                      | <b>Half felt lacking in energy some of or all the time</b> (IQR=1-3)                                                                                    | Very few felt lacking in energy some of or all the time (IQR=0-1)                                                                                   | Few felt lacking in energy some of or all the time (IQR=1-1)                                                                                          | <b>Half felt lacking in energy some of or all the time</b> (IQR=2-4)                                                                         | Few felt lacking in energy some of or all the time (IQR=1-1)                                                                                          | <b>Many felt lacking in energy some of or all the time</b> (IQR=3-4)                                                                                     | Very few felt lacking in energy some of or all the time (IQR=0-1)                                                                                       | <b>Ordinal</b><br>0=at no time<br>5=all the time                                |
| <b>Felt less self-confident (MDI-4)</b> <sup>†</sup>               | None had felt less self-confident all the time and very few some of the time<br><br>At no time=88%<br>Some of the time=12%<br>Slightly-all the time=0% | Very few had felt less self-confident all the time and half some of the time<br><br>At no time=36%<br>Some of the time=49%<br>Slightly-all the time=15% | <b>None had felt less self-confident all the time or some of the time</b><br><br>At no time=100%<br>Some of the time=0%<br>Slightly-all the time=0% | Very few had felt less self-confident all the time and few some of the time<br><br>At no time=73%<br>Some of the time=23%<br>Slightly-all the time=4% | Few had felt less self-confident all the time or some of the time<br><br>At no time=43%<br>Some of the time=33%<br>Slightly-all the time=24% | Very few had felt less self-confident all the time and few some of the time<br><br>At no time=76%<br>Some of the time=23%<br>Slightly-all the time=1% | <b>Many had felt less self-confident all the time and few some of the time</b><br><br>At no time=5%<br>Some of the time=24%<br>Slightly-all the time=71% | <b>None had felt less self-confident all the time or some of the time</b><br><br>At no time=100%<br>Some of the time=0%<br>Slightly-all the time=0%     | <b>Ordinal</b><br>0=at no time<br>1=some of the time<br>2=slightly-all the time |
| <b>Had difficulty in concentrating (MDI-7)</b> <sup>†</sup>        | Very few had difficulty in concentrating all the time or some of the time<br><br>At no time=81%<br>Some of the time=17%                                | Very few had difficulty in concentrating all the time and few some of the time<br><br>At no time=47%<br>Some of the time=38%                            | <b>None had difficulty in concentrating all the time and few some of the time</b><br><br>At no time=95%<br>Some of the time=5%<br>Slightly-all the  | Very few had difficulty in concentrating all the time or some of the time<br><br>At no time=77%<br>Some of the time=19%                               | Very few had difficulty in concentrating all the time and half some of the time<br><br>At no time=39%<br>Some of the time=42%                | Very few had difficulty in concentrating all the time and few some of the time<br><br>At no time=74%<br>Some of the time=23%                          | <b>Half had difficulty in concentrating all the time and few some of the time</b><br><br>At no time=4%<br>Some of the time=38%                           | <b>None had difficulty in concentrating all the time and very few some of the time</b><br><br>At no time=94%<br>Some of the time=6%<br>Slightly-all the | <b>Ordinal</b><br>0=at no time<br>1=some of the time<br>2=slightly-all the time |

|                                                                                          |                                                                                                                                                                  |                                                                                                                                                              |                                                                                                                                                                                  |                                                                                                                                                           |                                                                                                                                                       |                                                                                                                                                    |                                                                                                                                                                                                  |                                                                                                                                                           |                                                                                       |
|------------------------------------------------------------------------------------------|------------------------------------------------------------------------------------------------------------------------------------------------------------------|--------------------------------------------------------------------------------------------------------------------------------------------------------------|----------------------------------------------------------------------------------------------------------------------------------------------------------------------------------|-----------------------------------------------------------------------------------------------------------------------------------------------------------|-------------------------------------------------------------------------------------------------------------------------------------------------------|----------------------------------------------------------------------------------------------------------------------------------------------------|--------------------------------------------------------------------------------------------------------------------------------------------------------------------------------------------------|-----------------------------------------------------------------------------------------------------------------------------------------------------------|---------------------------------------------------------------------------------------|
|                                                                                          | Slightly-all the time=2%                                                                                                                                         | Slightly-all the time=15%                                                                                                                                    | time=0%                                                                                                                                                                          | Slightly-all the time=3%                                                                                                                                  | Slightly-all the time=20%                                                                                                                             | Slightly-all the time=3%                                                                                                                           | Slightly-all the time=58%                                                                                                                                                                        | time=0%                                                                                                                                                   |                                                                                       |
| <b>Have suffered from reduced/increased appetite (MDI-10)</b> <sup>xx</sup>              | Very few had reduced/increased appetite all the time or some of the time<br><br>At no time=78%<br>Some of the time=16%<br>Slightly-all the time=5%               | Very few had reduced/increased appetite all the time and few some of the time<br><br>At no time=48%<br>Some of the time=34%<br>Slightly-all the time=18%     | None had reduced/increased appetite all the time and few some of the time<br><br>At no time=98%<br>Some of the time=2%<br>Slightly-all the time=0%                               | Very few had reduced/increased appetite all the time or some of the time<br><br>At no time=82%<br>Some of the time=13%<br>Slightly-all the time=6%        | <b>Few had reduced/increased appetite all the time or some of the time</b><br><br>At no time=44%<br>Some of the time=31%<br>Slightly-all the time=25% | Very few had reduced/increased appetite all the time or some of the time<br><br>At no time=80%<br>Some of the time=15%<br>Slightly-all the time=5% | <b>Half had reduced/increased appetite all the time and few some of the time</b><br><br>At no time=18%<br>Some of the time=27%<br>Slightly-all the time=55%                                      | Very few had reduced/increased appetite all the time or some of the time<br><br>At no time=85%<br>Some of the time=13%<br>Slightly-all the time=2%        | <b>Ordinal</b><br>0=at no time<br>1=some of the time<br>2=slightly-all the time       |
| <b>More irritable with people than usual (RMDQ-17)</b> <sup>xxx</sup>                    | Few more irritable (23%)                                                                                                                                         | Half more irritable (54%)                                                                                                                                    | <b>Very few more irritable (7%)</b>                                                                                                                                              | Few more irritable (21%)                                                                                                                                  | Half more irritable (59%)                                                                                                                             | Few more irritable (37%)                                                                                                                           | <b>Most more irritable (91%)</b>                                                                                                                                                                 | Few more irritable (25%)                                                                                                                                  | <b>Dichotomous</b><br>0=no<br>1=yes                                                   |
| <b>Rubbing or holding areas that hurt/are uncomfortable (RMDQ-21)</b> <sup>xxx</sup>     | Few rub/hold areas that hurt (35%)                                                                                                                               | Half rub/hold areas that hurt (54%)                                                                                                                          | Few rub/hold areas that hurt (22%)                                                                                                                                               | Half rub/hold areas that hurt (50%)                                                                                                                       | Half rub/hold areas that hurt (59%)                                                                                                                   | Half rub/hold areas that hurt (43%)                                                                                                                | <b>Many rub/hold areas that hurt (75%)</b>                                                                                                                                                       | Few rub/hold areas that hurt (33%)                                                                                                                        | <b>Dichotomous</b><br>0=no<br>1=yes                                                   |
| <b>Not safe to be physically active (SBT-5)</b> <sup>xxx</sup>                           | Very few believe it is not safe to be physically active (14%)                                                                                                    | Few believe it is not safe to be physically active (28%)                                                                                                     | Very few believe it is not safe to be physically active (5%)                                                                                                                     | Very few believe it is not safe to be physically active (7%)                                                                                              | Few believe it is not safe to be physically active (24%)                                                                                              | Very few believe it is not safe to be physically active (18%)                                                                                      | Few believe it is not safe to be physically active (33%)                                                                                                                                         | Very few believe it is not safe to be physically active (17%)                                                                                             | Dichotomous<br>0=disagree<br>1=agree                                                  |
| <b>Terrible back pain, will never get better (SBT-7)</b> <sup>xxx</sup>                  | Very few with terrible back pain (1%)                                                                                                                            | Very few with terrible back pain (11%)                                                                                                                       | Very few with terrible back pain (1%)                                                                                                                                            | Very few with terrible back pain (5%)                                                                                                                     | Very few with terrible back pain (15%)                                                                                                                | Very few with terrible back pain (1%)                                                                                                              | <b>Few with terrible back pain (26%)</b>                                                                                                                                                         | Very few with terrible back pain (4%)                                                                                                                     | Dichotomous<br>0=disagree<br>1=agree                                                  |
| <b>Often express concern (RMDQ-23)</b> <sup>xxx</sup>                                    | Very few express concern (7%)                                                                                                                                    | Few express concern (26%)                                                                                                                                    | Very few express concern (2%)                                                                                                                                                    | Very few express concern (7%)                                                                                                                             | Few express concern (26%)                                                                                                                             | Very few express concern (9%)                                                                                                                      | Half express concern (42%)                                                                                                                                                                       | Very few express concern (10%)                                                                                                                            | <b>Dichotomous</b><br>0=no<br>1=yes                                                   |
| <b>Physical activity might harm back (FABQ-3)</b> <sup>xxxx</sup>                        | Few believe physical activity might harm back<br><br>Disagree=38%<br>Unsure=39%<br>Agree=22%                                                                     | Few believe physical activity might harm back<br><br>Disagree=31%<br>Unsure=39%<br>Agree=30%                                                                 | Very few believe physical activity might harm back<br><br>Disagree=59%<br>Unsure=25%<br>Agree=15%                                                                                | Few believe physical activity might harm back<br><br>Disagree=50%<br>Unsure=28%<br>Agree=21%                                                              | Few believe physical activity might harm back<br><br>Disagree=40%<br>Unsure=31%<br>Agree=29%                                                          | Very few believe physical activity might harm back<br><br>Disagree=56%<br>Unsure=30%<br>Agree=14%                                                  | Very few believe physical activity might harm back<br><br>Disagree=38%<br>Unsure=43%<br>Agree=19%                                                                                                | Few believe physical activity might harm back<br><br>Disagree=48%<br>Unsure=30%<br>Agree=22%                                                              | <b>Ordinal<sup>†</sup></b><br>0=completely disagree<br>3=unsure<br>6=completely agree |
| <b>Should not do physical activity which (might) make worse (FABQ-4)</b> <sup>xxxx</sup> | Half believe avoiding physical activity is better<br><br>Disagree=20%<br>Unsure=25%<br>Agree=55%                                                                 | Many believe avoiding physical activity is better<br><br>Disagree=14%<br>Unsure=25%<br>Agree=61%                                                             | Few believe avoiding physical activity is better<br><br>Disagree=37%<br>Unsure=24%<br>Agree=39%                                                                                  | Many believe avoiding physical activity is better<br><br>Disagree=21%<br>Unsure=15%<br>Agree=65%                                                          | Many believe avoiding physical activity is better<br><br>Disagree=19%<br>Unsure=18%<br>Agree=63%                                                      | Half believe avoiding physical activity is better<br><br>Disagree=22%<br>Unsure=25%<br>Agree=53%                                                   | Half believe avoiding physical activity is better<br><br>Disagree=18%<br>Unsure=29%<br>Agree=53%                                                                                                 | Half believe avoiding physical activity is better<br><br>Disagree=18%<br>Unsure=29%<br>Agree=53%                                                          | <b>Ordinal<sup>†</sup></b><br>0=completely disagree<br>3=unsure<br>6=completely agree |
| <b>Labelling and clinical description</b>                                                | <b>Treatment believers with low degree of depressive mood</b><br><br><b>Less</b><br>• believe that treatment is not essential<br>• with negative recovery belief | <b>Pain-related concerns, moderate degree of depressive mood</b><br><br><b>More</b><br>• have work concerns (more believe work will harm, they should not do | <b>The uncomplicated psychological profile</b><br><br><b>Less</b><br>• sleep less well<br>• have work concerns (less believe work will harm or they should not do normal work or | <b>Sleep well, low degree of depressive mood</b><br><br><b>Less</b><br>• (None) sleep less well<br>• believe they cannot work till pain treated or should | <b>Treatment believers with sleep issues and moderate degree of depressive mood</b><br><br><b>Less</b><br>• believe that treatment is not essential   | <b>Sleep issues, low degree of pain-related concern</b><br><br><b>More</b><br>• (All) sleep less well<br>• had trouble sleeping<br><br><b>Less</b> | <b>The complicated psychological profile</b><br><b>More</b><br>• have work concerns (more believe work will harm and that they cannot work till pain treated)<br>• with negative recovery belief | <b>Pain-related concerns, low degree of depression</b><br><br><b>More</b><br>• believe that treatment is not essential<br>• are not able to decrease pain |                                                                                       |

|                                                |                                                                                                    |                                                                                                                                                                                      |                                                                                                                                                                                                                                                                                                                                                                                                                                                                                                                                                                                                                                                                                                                                                    |                                                                                                       |                                                                                                                                                                                                 |                                                                                                                                                                                                                                                                                                                                                                                                                                                                                                                                                                                                                                                                                                                                                                                                                                                                                                                                                                   |                                                                                                                                                                                                                                                                                                                                                                                                                                                                                                                                                                                                                                                                                                                                        |                         |
|------------------------------------------------|----------------------------------------------------------------------------------------------------|--------------------------------------------------------------------------------------------------------------------------------------------------------------------------------------|----------------------------------------------------------------------------------------------------------------------------------------------------------------------------------------------------------------------------------------------------------------------------------------------------------------------------------------------------------------------------------------------------------------------------------------------------------------------------------------------------------------------------------------------------------------------------------------------------------------------------------------------------------------------------------------------------------------------------------------------------|-------------------------------------------------------------------------------------------------------|-------------------------------------------------------------------------------------------------------------------------------------------------------------------------------------------------|-------------------------------------------------------------------------------------------------------------------------------------------------------------------------------------------------------------------------------------------------------------------------------------------------------------------------------------------------------------------------------------------------------------------------------------------------------------------------------------------------------------------------------------------------------------------------------------------------------------------------------------------------------------------------------------------------------------------------------------------------------------------------------------------------------------------------------------------------------------------------------------------------------------------------------------------------------------------|----------------------------------------------------------------------------------------------------------------------------------------------------------------------------------------------------------------------------------------------------------------------------------------------------------------------------------------------------------------------------------------------------------------------------------------------------------------------------------------------------------------------------------------------------------------------------------------------------------------------------------------------------------------------------------------------------------------------------------------|-------------------------|
|                                                | <ul style="list-style-type: none"> <li>• feel socially isolated</li> <li>• feel worried</li> </ul> | normal work and cannot work till pain treated) <ul style="list-style-type: none"> <li>• have felt sad some of the time</li> <li>• felt lacking in energy some of the time</li> </ul> | cannot work till pain treated) <ul style="list-style-type: none"> <li>• with negative recovery belief</li> <li>• feel socially isolated</li> <li>• feel worried</li> <li>• have not enjoyed usual things</li> <li>• more irritable</li> <li>• depressive mood:</li> <li>• <i>have lost interest in daily activities</i></li> <li>• <i>have felt restless</i></li> <li>• <i>had bad conscience some or all the time</i></li> <li>• <i>have felt sad some or all the time</i></li> <li>• <i>(none) had felt less self-confident all the time or some of the time</i></li> <li>• <i>(none) had difficulty in concentrating all the time and few some of the time</i></li> <li>• <i>(none) had suffered from reduced/increased appetite</i></li> </ul> | not do normal work with present pain <ul style="list-style-type: none"> <li>• feel worried</li> </ul> | <b>More</b> <ul style="list-style-type: none"> <li>• felt lacking in energy some of the time</li> <li>• had suffered from reduced/increased appetite</li> <li>• had trouble sleeping</li> </ul> | <ul style="list-style-type: none"> <li>• have work concerns (less believe work will harm or they should not do normal work or cannot work till pain treated)</li> <li>• feel socially isolated</li> <li>• feel worried</li> <li>• rub/holds areas that hurt</li> <li>• have not enjoyed usual things</li> <li>• more irritable</li> <li>• depressive mood:</li> <li>• <i>have lost interest in daily activities</i></li> <li>• <i>have felt restless</i></li> <li>• <i>had bad conscience some or all the time</i></li> <li>• <i>have felt sad some or all the time</i></li> <li>• <i>felt lacking in energy most of the time</i></li> <li>• <i>had felt less self-confident all the time or some of the time</i></li> <li>• <i>had difficulty in concentrating all the time and few some of the time</i></li> <li>• <i>had trouble sleeping</i></li> <li>• <i>had suffered from reduced/increased appetite</i></li> <li>• <i>had trouble sleeping</i></li> </ul> | <ul style="list-style-type: none"> <li>• have work concerns (more believe they should not do normal work and cannot work till pain treated)</li> </ul> <b>Less</b> <ul style="list-style-type: none"> <li>• with negative recovery belief</li> <li>• feel socially isolated</li> <li>• feel worried</li> <li>• depressive mood:</li> <li>• <i>have lost interest in daily activities</i></li> <li>• <i>have felt restless</i></li> <li>• <i>had bad conscience some or all the time</i></li> <li>• <i>have felt sad some or all the time</i></li> <li>• <i>had felt less self-confident all the time or some of the time</i></li> <li>• <i>(none) had difficulty in concentrating all the time and few some of the time</i></li> </ul> |                         |
| <b>Category size, N</b>                        | 199 (21%)                                                                                          | 154 (17%)                                                                                                                                                                            | 132 (14%)                                                                                                                                                                                                                                                                                                                                                                                                                                                                                                                                                                                                                                                                                                                                          | 119 (13%)                                                                                             | 122 (13%)                                                                                                                                                                                       | 99 (11%)                                                                                                                                                                                                                                                                                                                                                                                                                                                                                                                                                                                                                                                                                                                                                                                                                                                                                                                                                          | 55 (6%)                                                                                                                                                                                                                                                                                                                                                                                                                                                                                                                                                                                                                                                                                                                                | 48 (5%)                 |
| <b>Posterior probability, median</b>           | 0.98<br>(IQR=0.88-1.00)                                                                            | 0.98<br>(IQR=0.90-1.00)                                                                                                                                                              | 0.96<br>(IQR=0.87-1.00)                                                                                                                                                                                                                                                                                                                                                                                                                                                                                                                                                                                                                                                                                                                            | 0.97<br>(IQR=0.89-0.99)                                                                               | 0.98<br>(IQR=0.90-0.99)                                                                                                                                                                         | 0.95<br>(IQR=0.86-0.99)                                                                                                                                                                                                                                                                                                                                                                                                                                                                                                                                                                                                                                                                                                                                                                                                                                                                                                                                           | 0.99<br>(IQR=0.96-1.00)                                                                                                                                                                                                                                                                                                                                                                                                                                                                                                                                                                                                                                                                                                                | 0.96<br>(IQR=0.75-1.00) |
| <b>Posterior probability less than 0.70, N</b> | 20<br>(10%)                                                                                        | 13<br>(8%)                                                                                                                                                                           | 17<br>(13%)                                                                                                                                                                                                                                                                                                                                                                                                                                                                                                                                                                                                                                                                                                                                        | 10<br>(8%)                                                                                            | 10<br>(8%)                                                                                                                                                                                      | 11<br>(11%)                                                                                                                                                                                                                                                                                                                                                                                                                                                                                                                                                                                                                                                                                                                                                                                                                                                                                                                                                       | 4<br>(7%)                                                                                                                                                                                                                                                                                                                                                                                                                                                                                                                                                                                                                                                                                                                              | 9<br>(19%)              |

**Bold** text indicates characteristic features which mainly identify the respective domain-specific patient categories

† Trichotomised for the descriptive analysis: 0=disagree (0-2), 1=unsure (3), 2=agree (4-6)

IQR = interquartile range; RMDQ = Roland-Morris Disability Questionnaire; FABQ, Fear-Avoidance Beliefs Questionnaire; SBT = STaT Back Tool; MDI = Major Depression Inventory

Symbols and light lines: Variables which have similar scoring pattern across categories representing an overall feature:

\*sleep issues

\*\* pain-related concerns

‡ depressive mood

‡‡ catastrophising

‡‡‡ fear avoidance of physical activity

**Figure 7. Profile plot of the domain-specific patient categories identified in the psychology domain by the first stage of the two-stage LCA**



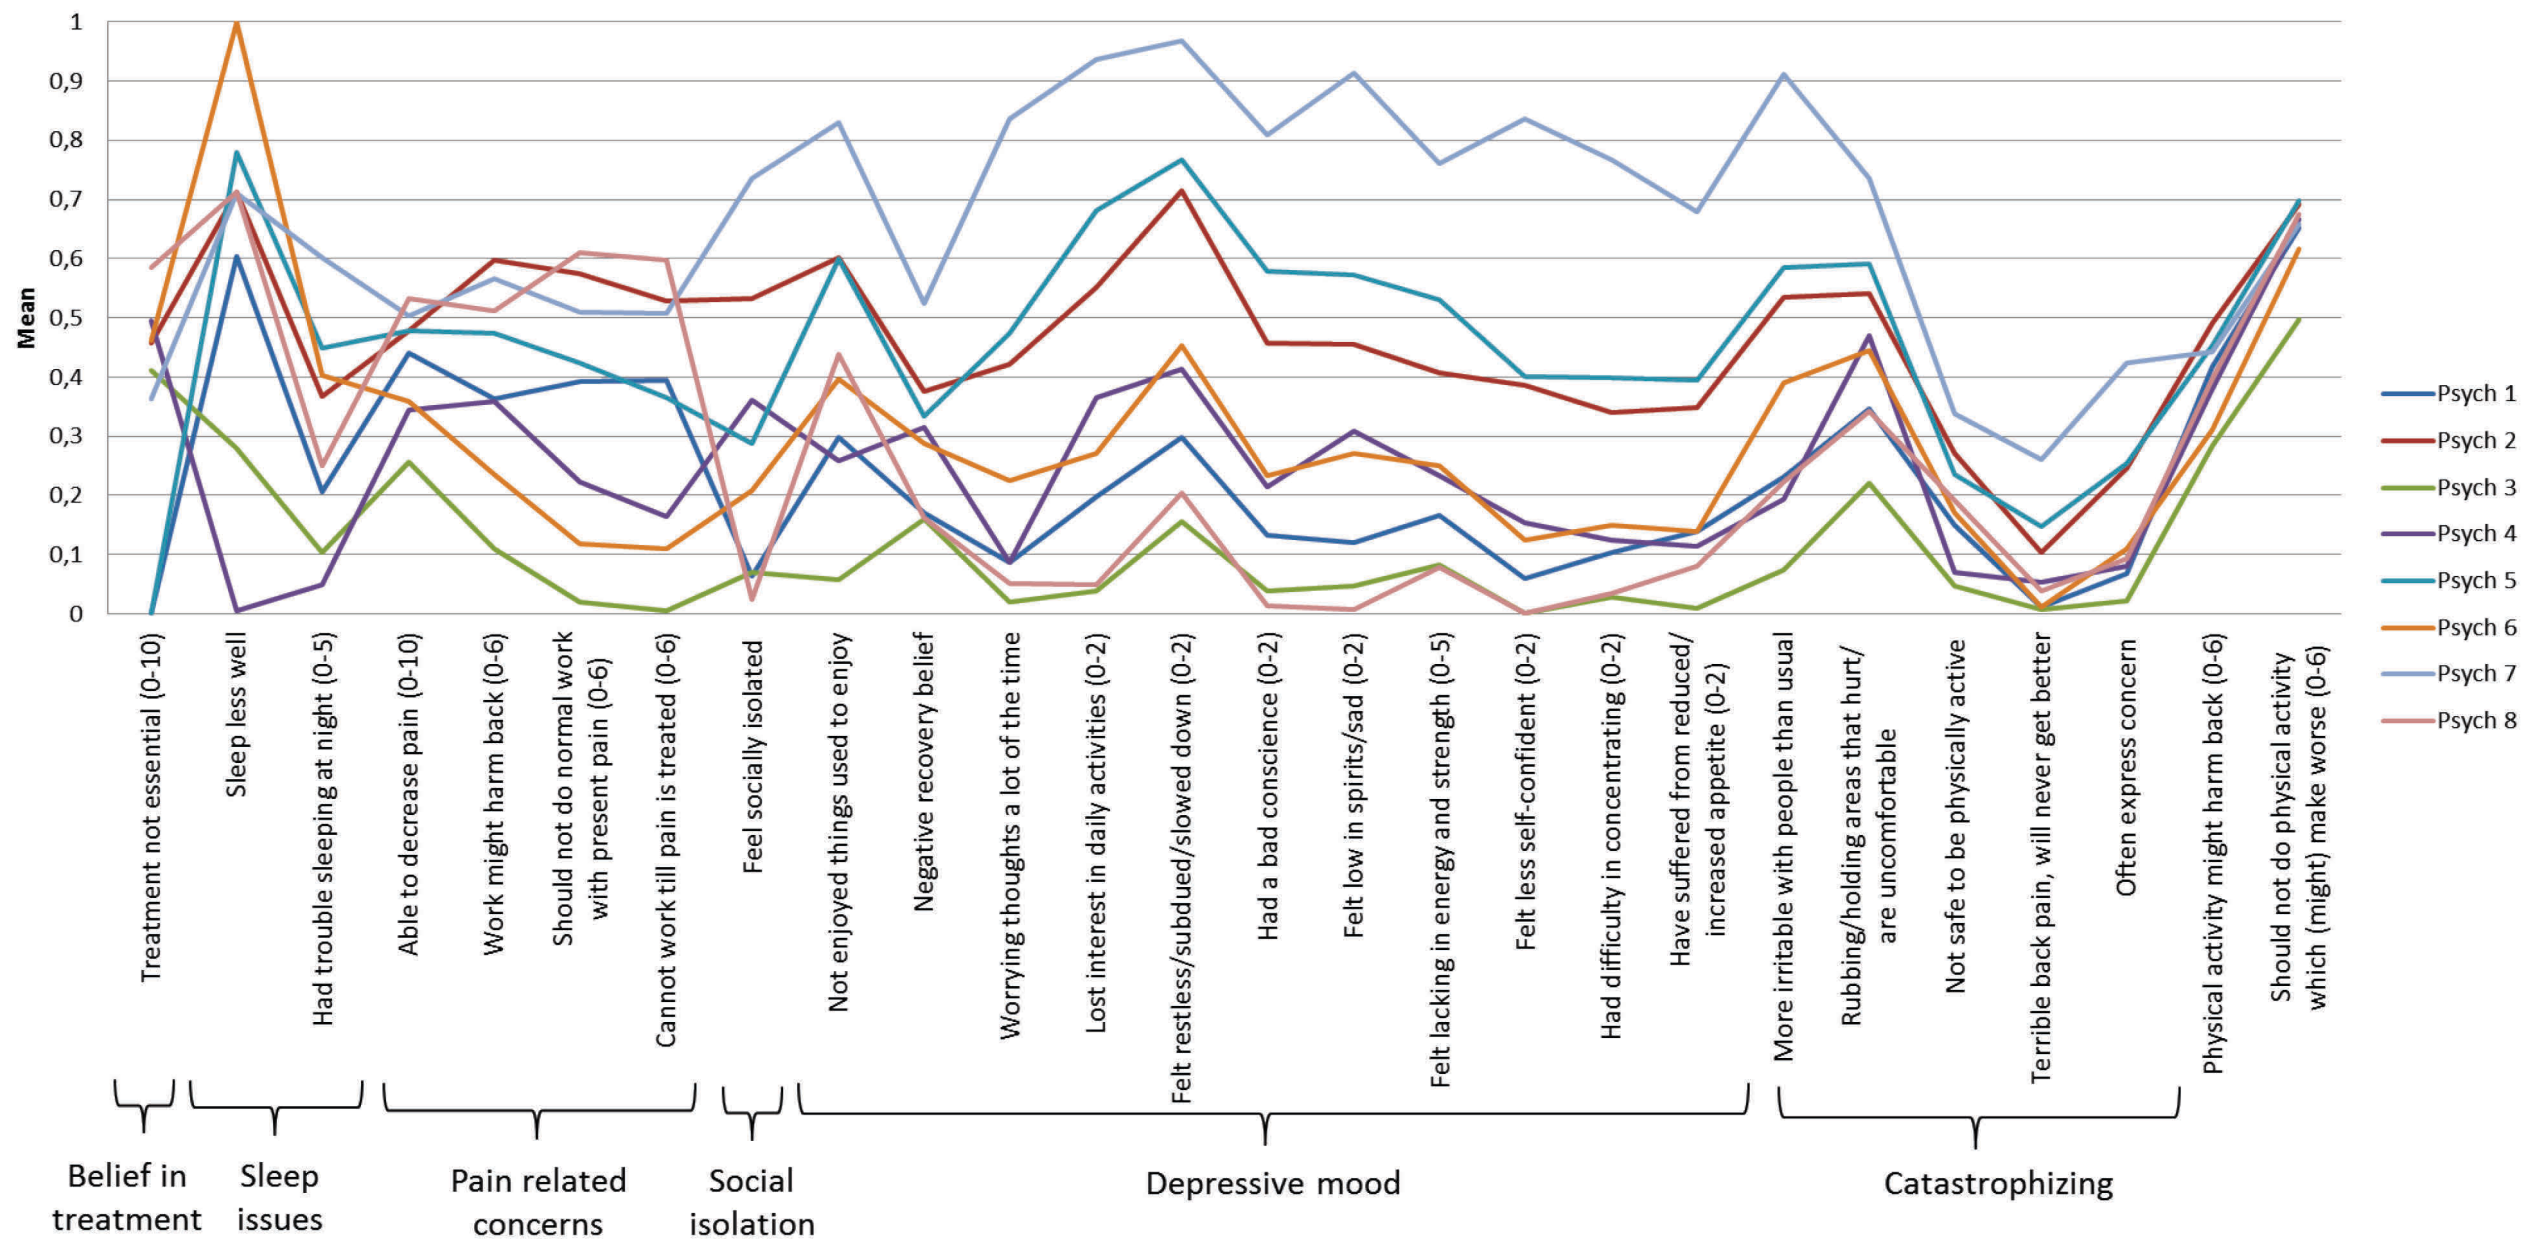

**Brief conceptual description of domain-specific patient categories identified in the psychology domain (first stage of two-stage LCA):**

- Psych 1: Treatment believers with low degree of depressive mood
- Psych 2: Pain-related concerns, moderate degree of depressive mood
- Psych 3: Uncomplicated psychological profile
- Psych 4: Sleep well, low degree of depressive mood
- Psych 5: Treatment believers with sleep issues and moderate degree of depressive mood
- Psych 6: Sleep issues, low degree of pain-related concerns
- Psych 7: The complicated psychological profile
- Psych 8: Pain-related concerns, low degree of depressive mood
