# Supplementary material for: Identifying subgroups of patients using latent class analysis: should we use a single-stage or a two-stage approach? A methodological study using a cohort of patients with low back pain
Source: Springer Nature journal article supplement (doi:10.1186/s12891-017-1411-x), 2017-02-01
Supplement: MOESM5 [file 12035474]

## Additional file 5

**Table 1. Statistical characteristics for identified patient subgroup models**

| Approach                        | Sub-groups | Size of smallest subgroup, N (%) | BIC <sub>LL</sub> | % change of BIC <sub>LL</sub> | Frequency of presented BIC | Log-likelihood  | Parameters  |
|---------------------------------|------------|----------------------------------|-------------------|-------------------------------|----------------------------|-----------------|-------------|
| Single-stage LCA                | 1          | 928 (100)                        | 177996.0          |                               | 10/10                      | -88294.2        | 206         |
|                                 | 2          | <i>276 (29.7)</i>                | <i>172314.1</i>   | <i>3.19</i>                   | <i>10/10</i>               | <i>-84992.0</i> | <i>341</i>  |
|                                 | 3          | 163 (17.6)                       | 170843.3          | 0.85                          | 10/10                      | -83795.4        | 476         |
|                                 | 4          | 150 (16.1)                       | 170390.4          | 0.27                          | 3/10                       | -83107.7        | 611         |
|                                 | <u>5</u>   | <u>152 (16.4)</u>                | <u>170116.5</u>   | <u>0.16</u>                   | <u>3/10</u>                | <u>-82509.5</u> | <u>746</u>  |
|                                 | 6          | 123 (13.3)                       | 170193.0          | -0.04                         | 3/10                       | -82086.5        | 881         |
|                                 | <b>7</b>   | <b>77 (8.3)</b>                  | <b>170287.8</b>   | <b>-0.06</b>                  | <b>1/10</b>                | <b>-81672.7</b> | <b>1016</b> |
|                                 | 8          | 73 (7.9)                         | 170539.9          | -0.15                         | 1/10                       | -81337.5        | 1151        |
|                                 | 9          | 55 (6.0)                         | 170919.8          | -0.22                         | 1/10                       | -81066.3        | 1286        |
| Two-stage LCA<br>(second stage) | 1          | 928 (100)                        | 20279,3           |                               | 10/10                      | -10016,7        | 36          |
|                                 | <u>2</u>   | <u>(47.8)</u>                    | <u>19892,4</u>    | <u>1,91</u>                   | <u>10/10</u>               | <u>-9696,8</u>  | <u>73</u>   |
|                                 | 3          | (17.0)                           | 19947,0           | -0,27                         | 8/10                       | -9597,7         | 110         |
|                                 | 4          | (12.7)                           | 20051,9           | -0,53                         | 9/10                       | -9523,7         | 147         |
|                                 | 5          | (11.0)                           | 20181,8           | -0,65                         | 3/10                       | -9462,2         | 184         |
|                                 | 6          | (6.5)                            | 20344,8           | -0,81                         | 2/10                       | -9417,3         | 221         |
|                                 | 7          | (6.4)                            | 20517,9           | -0,85                         | 1/10                       | -9377,5         | 258         |
|                                 | 8          | (6.3)                            | 20689,7           | -0,84                         | 1/10                       | -9337,0         | 295         |
|                                 | <b>9</b>   | <b>(5.0)</b>                     | <b>20875,4</b>    | <b>-0,90</b>                  | <b>1/10</b>                | <b>-9303,4</b>  | <b>332</b>  |
|                                 | 10         | (4.8)                            | 21055,5           | -0,86                         | 1/10                       | -9267,1         | 369         |
|                                 | 11         | (2.1)                            | 21240,8           | -0,88                         | 1/10                       | -9233,3         | 406         |

BIC = Bayesian Information Criterion. %-change of BIC: A positive change represents a reduction of BIC

*Italics*: Selected starting model improving BIC by at least 1%

**Bold**: Preferred subgroup model

Underline: Best model if based only on lowest BIC

Shown are results of model sizes up to preferred model plus two. Additional results are available on request from the first author
